# Supplementary material
Source: publisher figshare collection journal article supplement (https://acs.figshare.com/ndownloader/files/3864016)

**Supporting Information**

**for**

**Gold-Catalyzed Cycloisomerization of 1,6-Diyne Esters to 1*H*-Cyclopenta[*b*]naphthalenes, *cis*-Cyclopenten-2-yl  $\delta$ -Diketones and Bicyclo[3.2.0]hepta-1,5-dienes**

*Dan Li,<sup>†</sup> Weidong Rao,<sup>†</sup> Guan Liang Tay,<sup>†</sup> Benjamin James Ayers,<sup>†</sup> and Philip Wai Hong*

*Chan<sup>\*,†,‡</sup>*

<sup>‡</sup>School of Chemistry, Monash University, Clayton 3800, Victoria, Australia

<sup>†</sup>Division of Chemistry and Biological Chemistry, School of Physical and Mathematical Sciences, Nanyang Technological University, Singapore 637371, Singapore

[phil.chan@monash.edu](mailto:phil.chan@monash.edu) and [waihong@ntu.edu.sg](mailto:waihong@ntu.edu.sg)

## Table of Contents

|                                                                                                         |    |
|---------------------------------------------------------------------------------------------------------|----|
| 1. $^1\text{H}$ and $^{13}\text{C}\{^1\text{H}\}$ NMR spectra for compounds <b>1a–l</b> and <b>4a–t</b> | S3 |
|---------------------------------------------------------------------------------------------------------|----|

# 1. $^1\text{H}$ and $^{13}\text{C}\{^1\text{H}\}$ NMR spectra for compounds 1a–λ and 4a–t

Figure S1.  $^1\text{H}$  and  $^{13}\text{C}\{^1\text{H}\}$  NMR spectra of 1,3,7-triphenylhepta-1,6-diyn-3-yl acetate (1a)

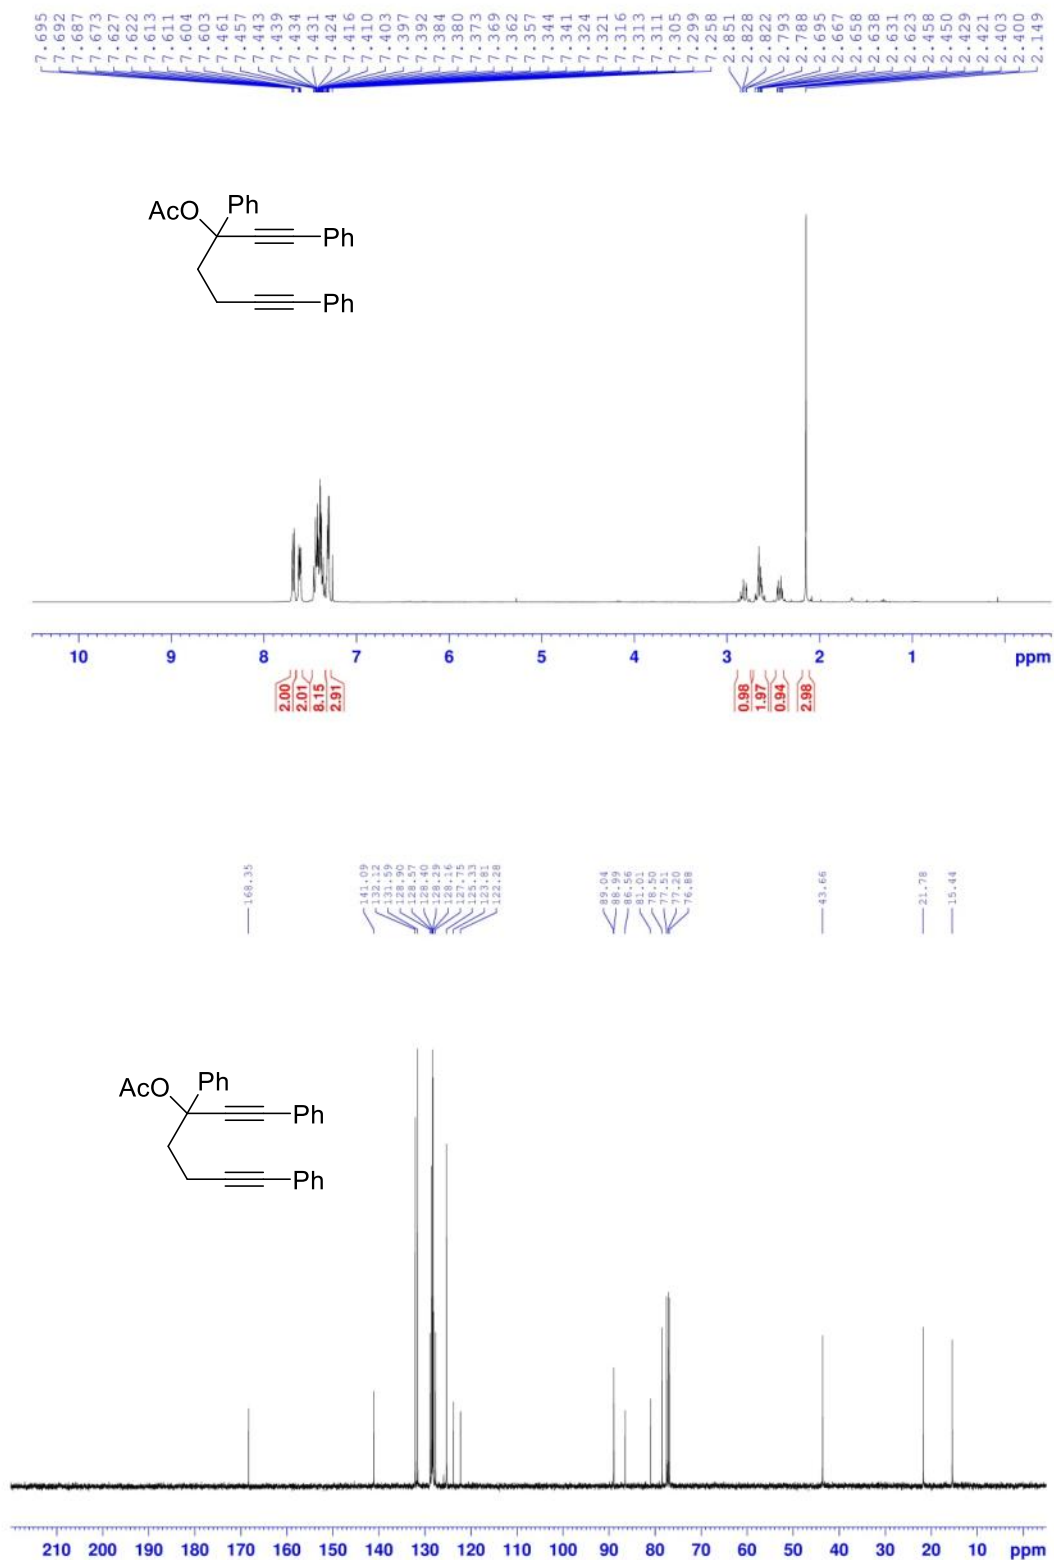

Figure S2.  $^1\text{H}$  and  $^{13}\text{C}\{^1\text{H}\}$  NMR spectra of 1,3,7-triphenylhepta-1,6-diyn-3-yl benzoate (1b)

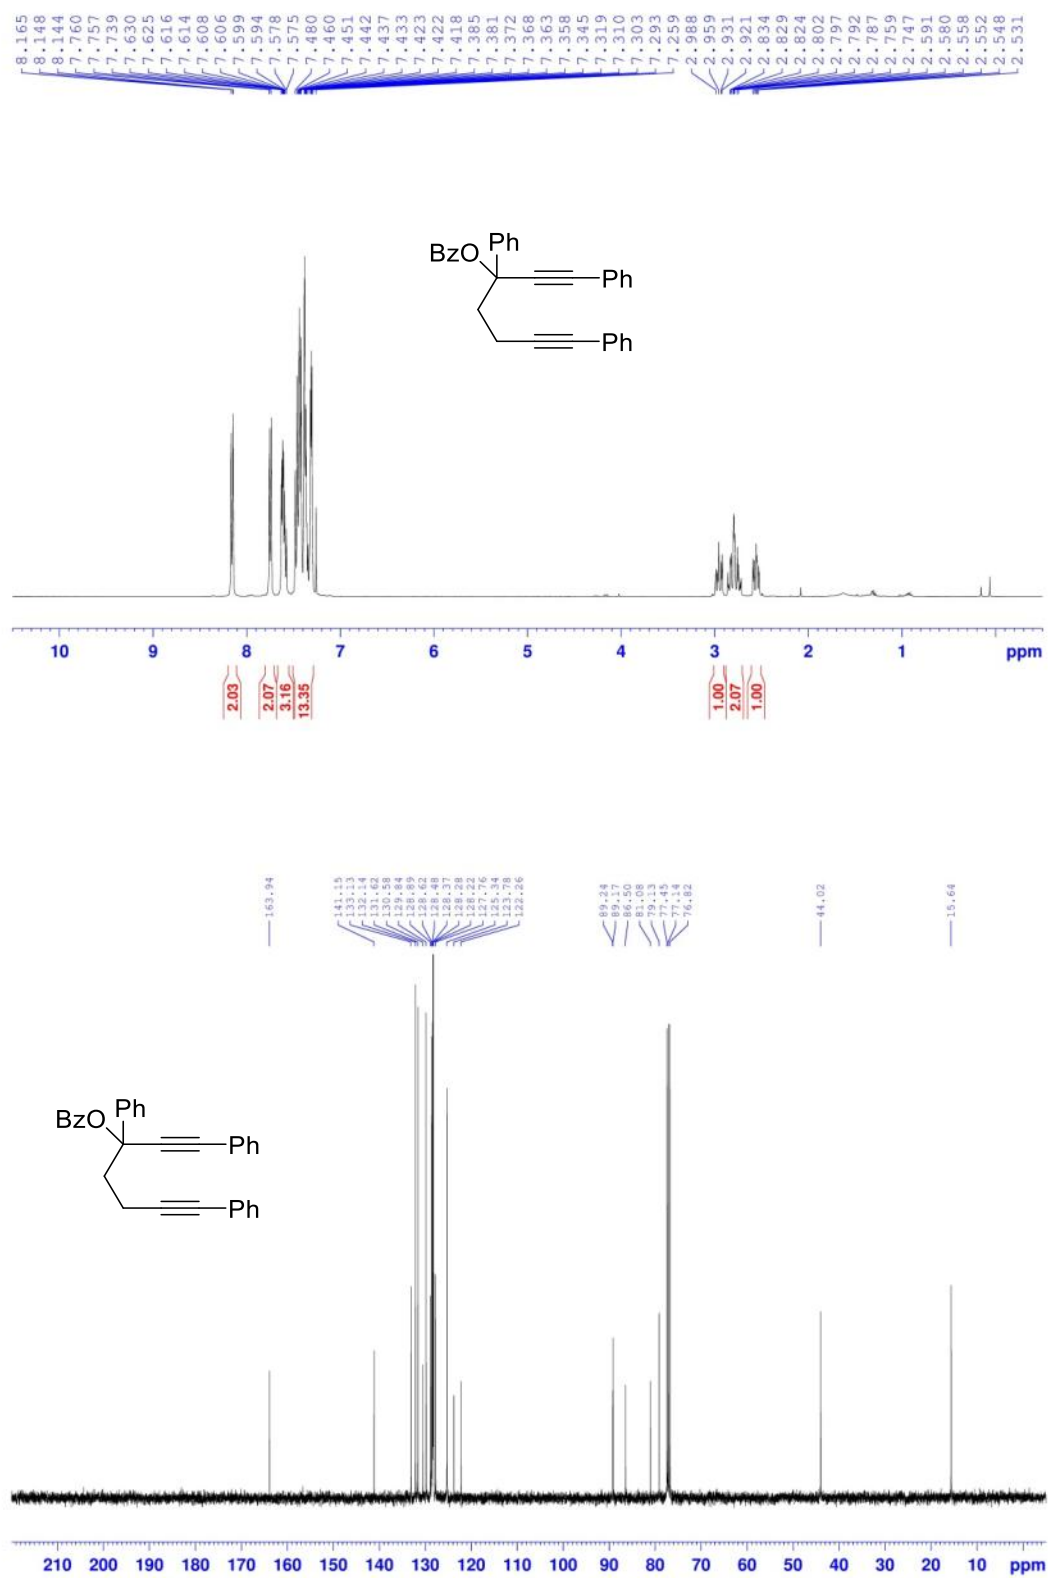

Figure S3.  $^1\text{H}$  and  $^{13}\text{C}\{^1\text{H}\}$  NMR spectra of 1,3,7-triphenylhepta-1,6-diyn-3-yl pivalate (1c)

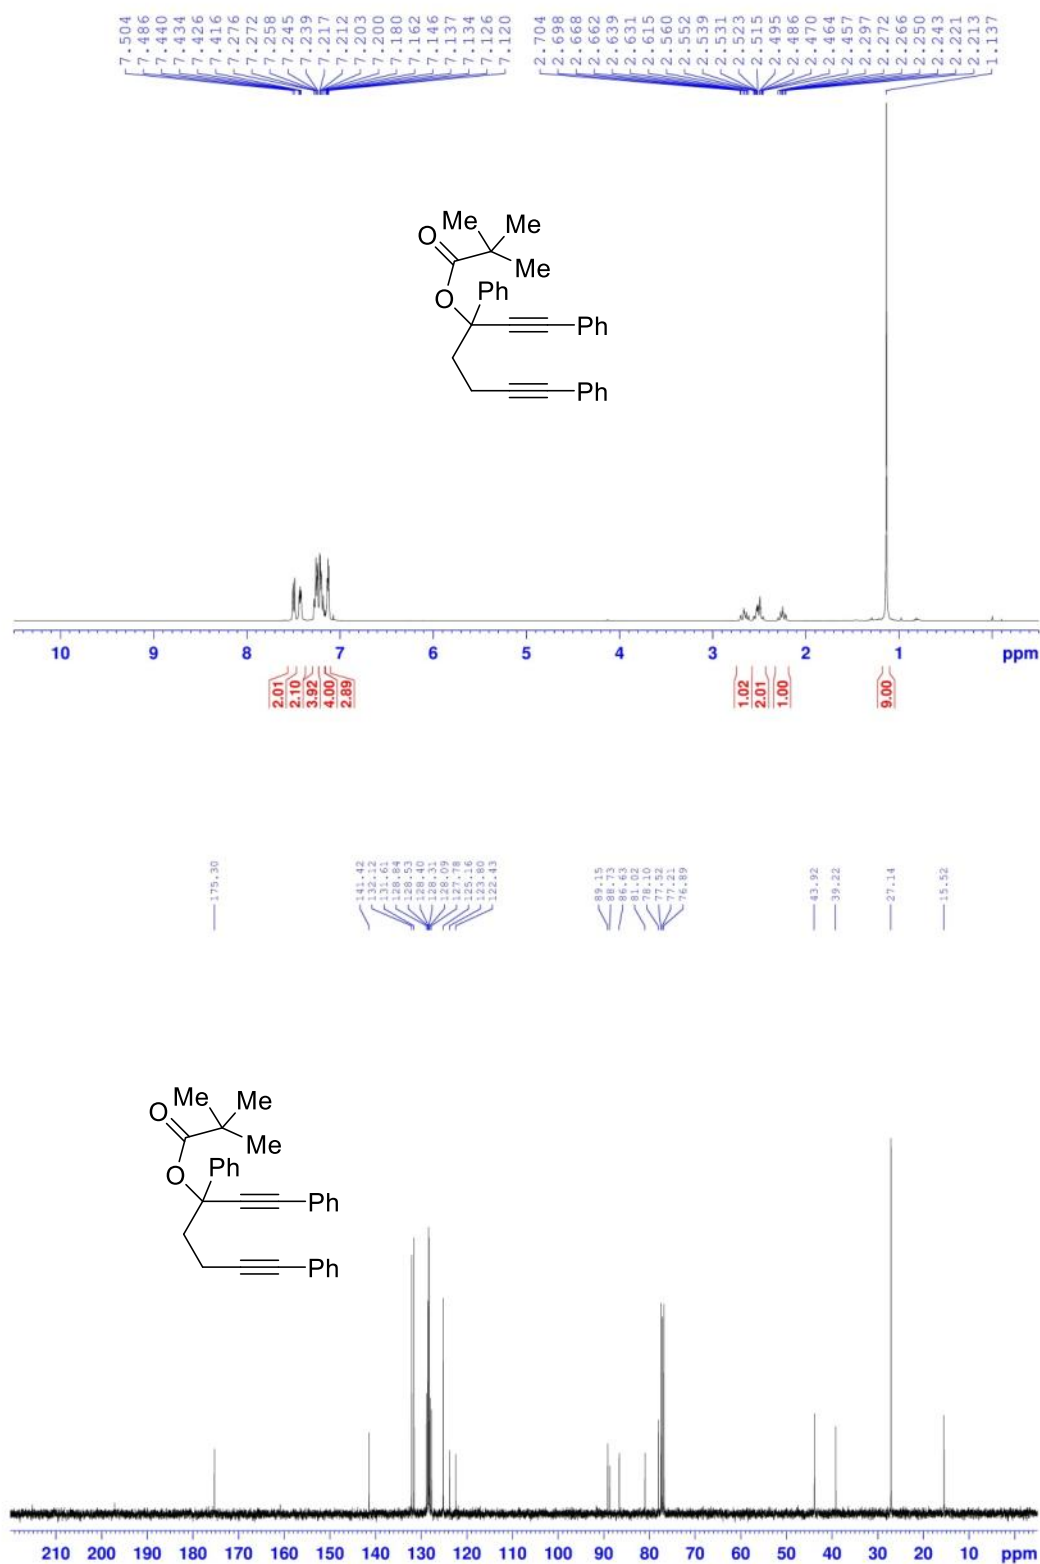

Figure S4.  $^1\text{H}$  and  $^{13}\text{C}\{^1\text{H}\}$  NMR spectra of 1,3,7-triphenylhepta-1,6-diyn-3-yl cyclopropanecarboxylate (1d)

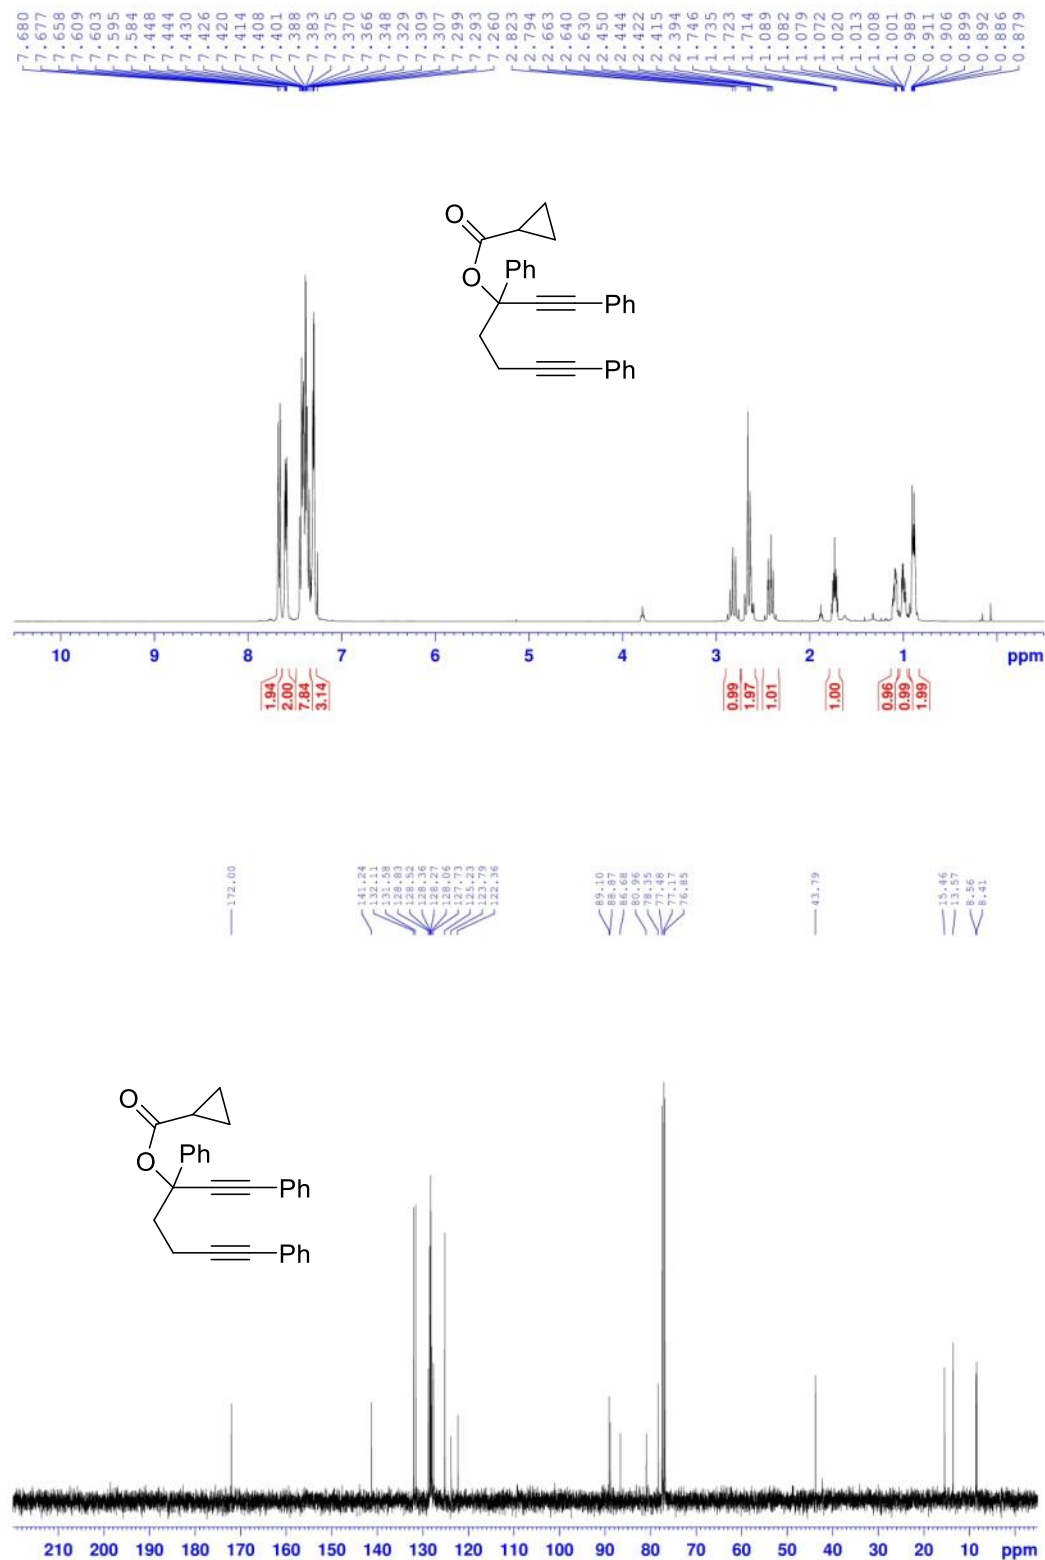

Figure S5.  $^1\text{H}$  and  $^{13}\text{C}\{^1\text{H}\}$  NMR spectra of 3-methyl-1,7-diphenylhepta-1,6-diyn-3-yl acetate (**1e**)

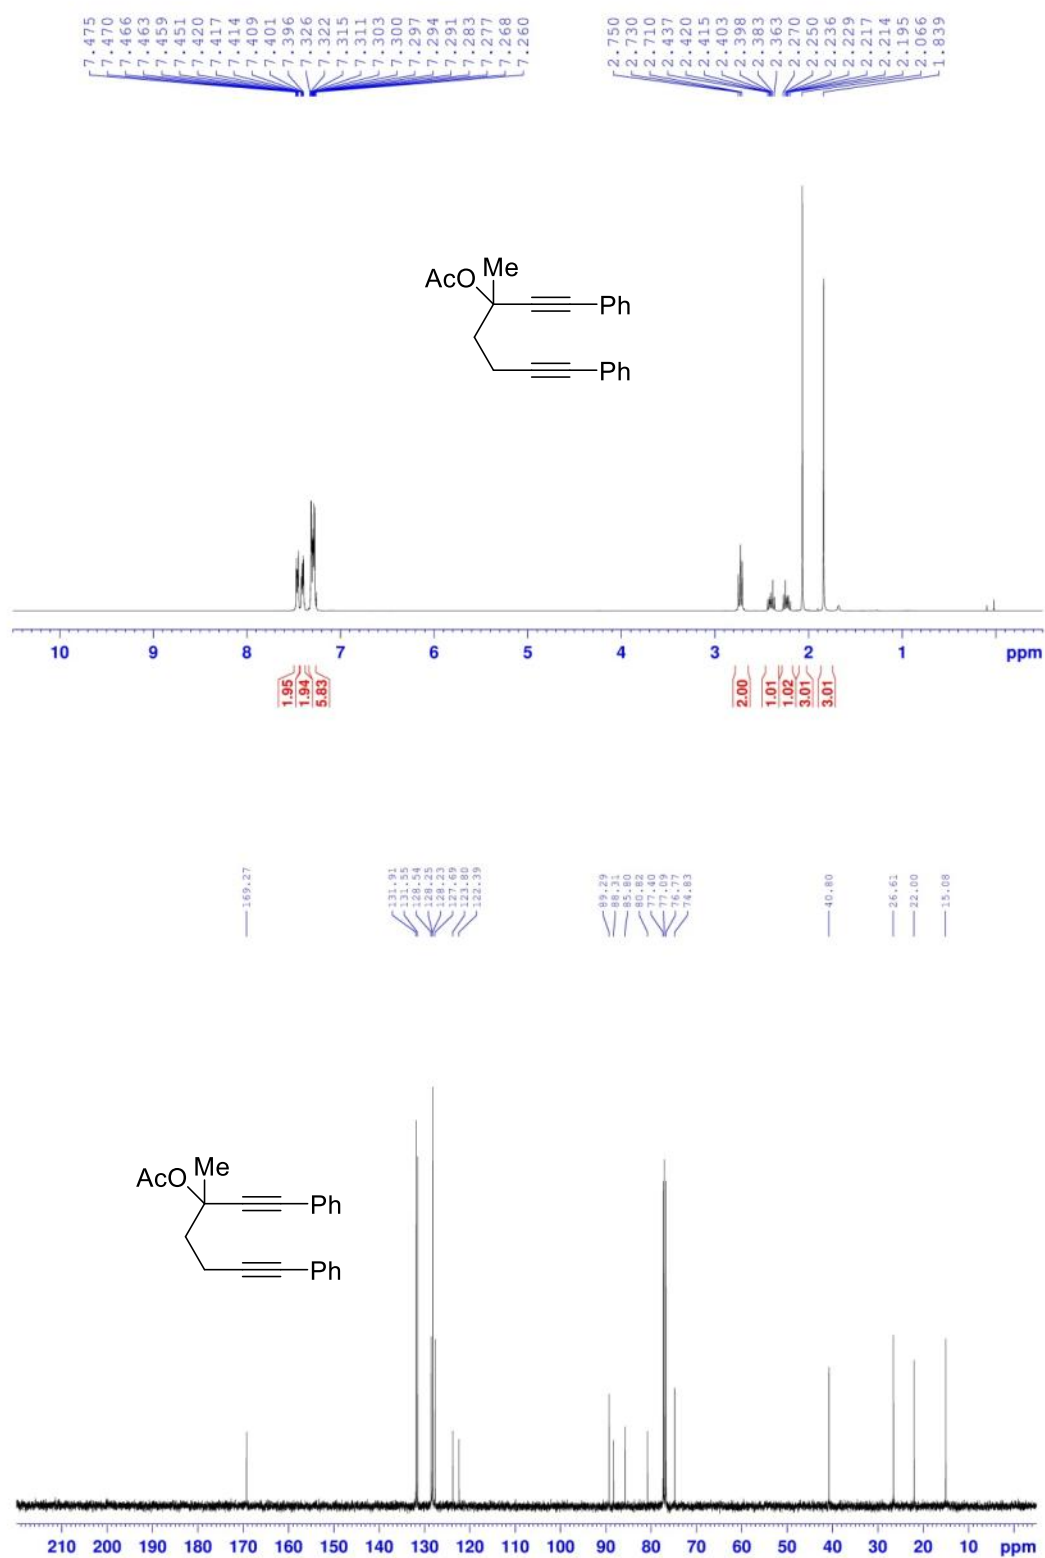

yl acetate (1f)

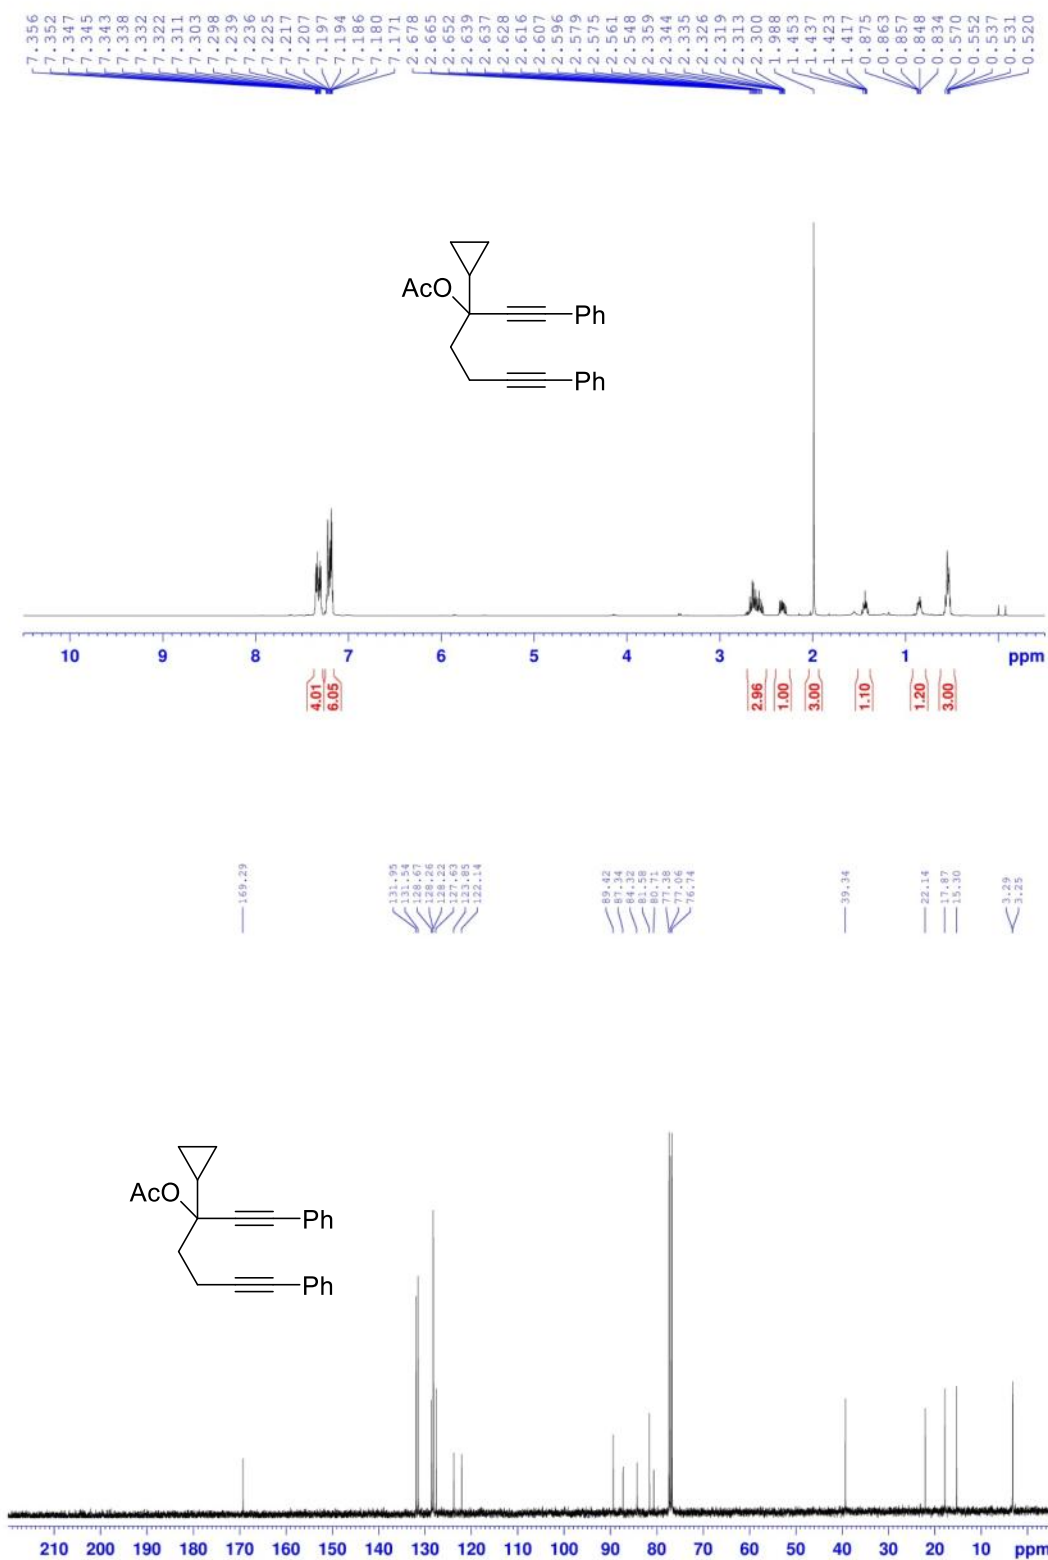



**Figure S7.  $^1\text{H}$  and  $^{13}\text{C}\{^1\text{H}\}$  NMR spectra of 3-(4-chlorophenyl)-1,7-diphenylhepta-1,6-diyn-3-yl acetate (1g)**

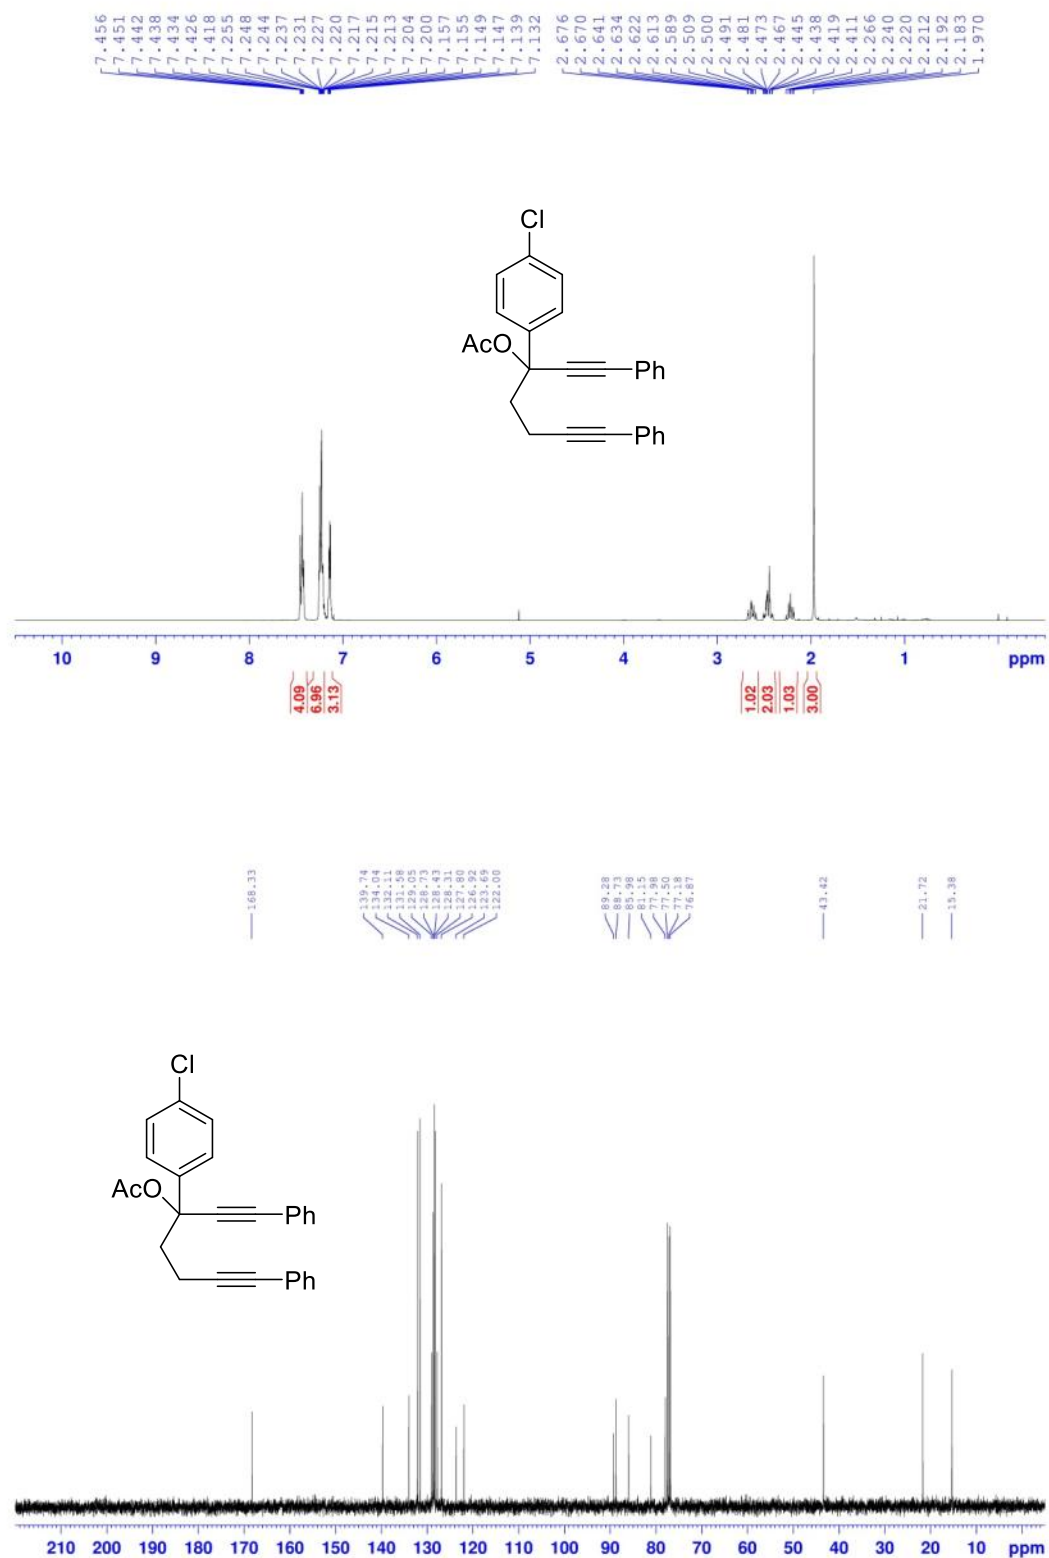

Figure S8.  $^1\text{H}$  and  $^{13}\text{C}\{^1\text{H}\}$  NMR spectra of 1-(4-fluorophenyl)-3,7-diphenylhepta-1,6-diyne-3-yl acetate (**1h**)

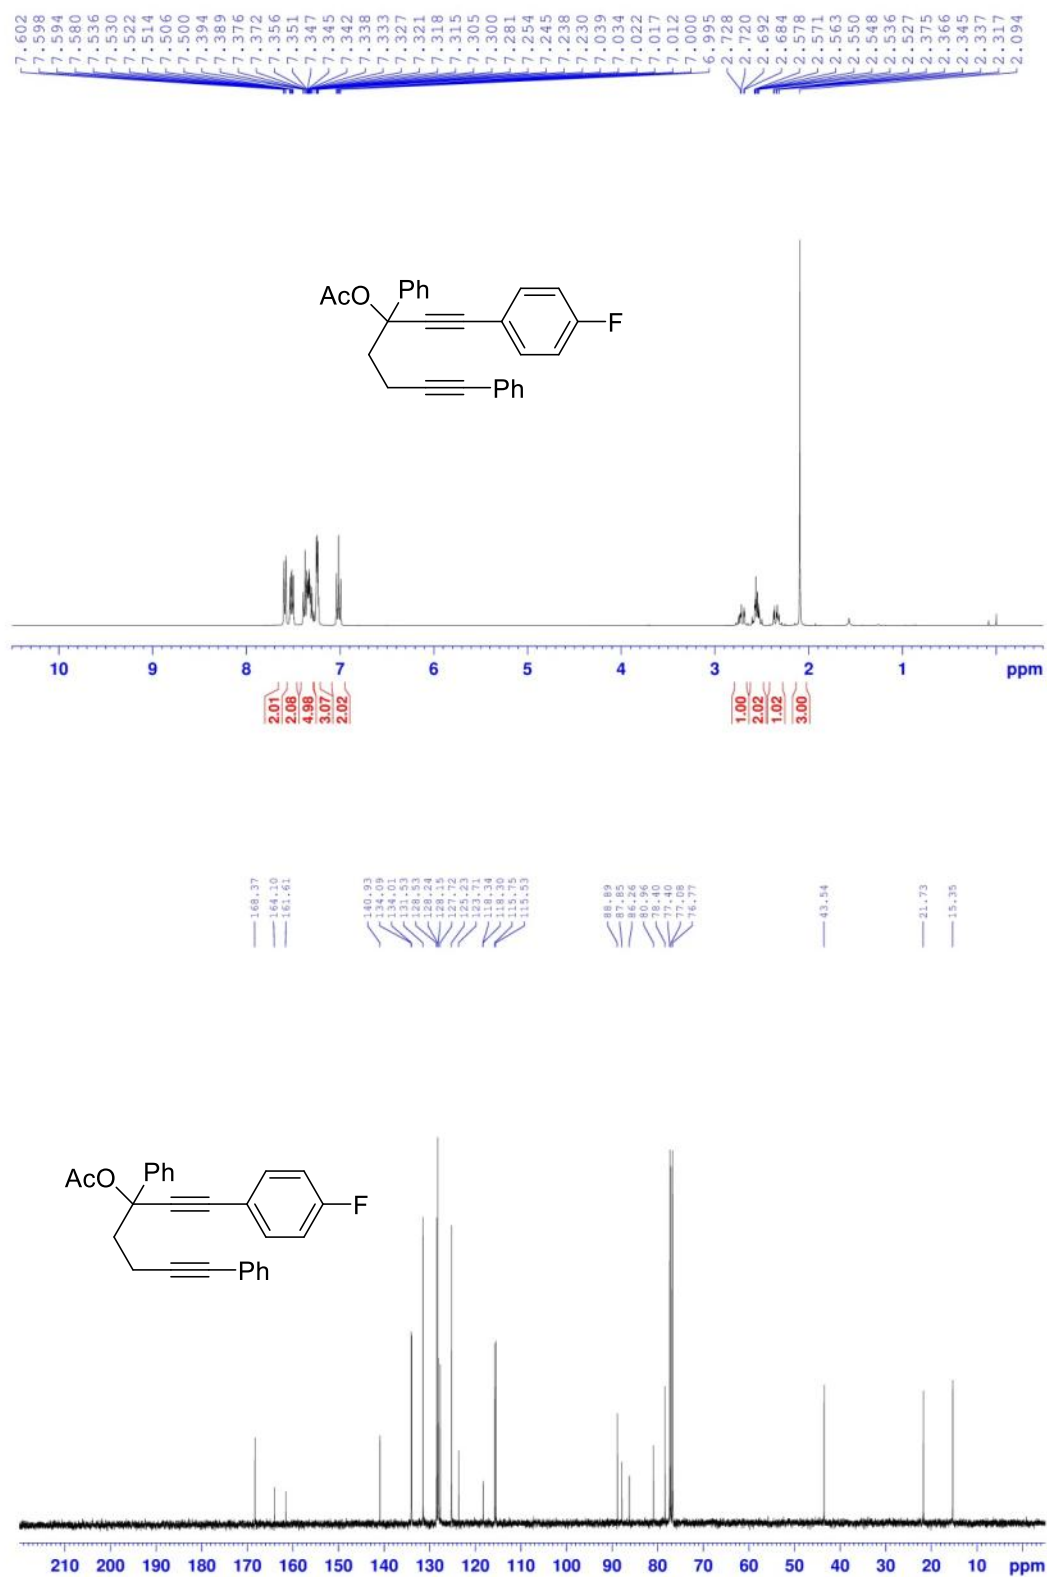

Figure S9.  $^1\text{H}$  and  $^{13}\text{C}\{^1\text{H}\}$  NMR spectra of 3,7-diphenyl-1-(p-tolyl)hepta-1,6-diyn-3-yl acetate (**1i**)

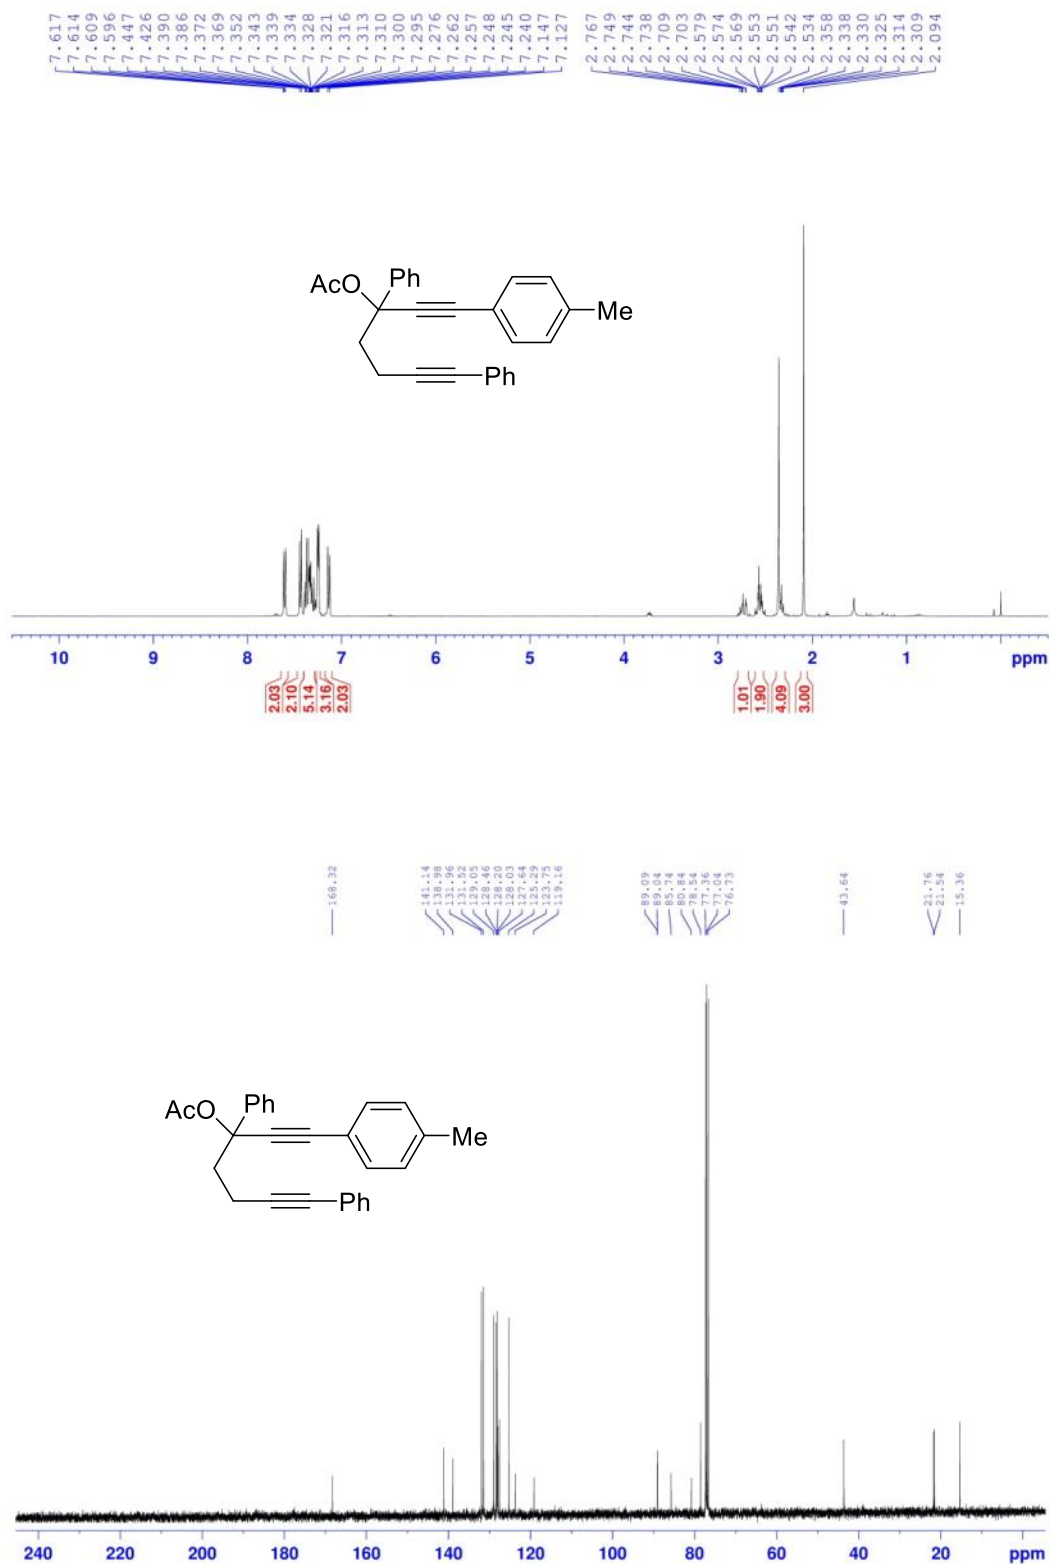

Figure S10.  $^1\text{H}$  and  $^{13}\text{C}\{^1\text{H}\}$  NMR spectra of 3,7-diphenyl-1-(thiophen-3-yl)hepta-1,6-diyne-3-yl acetate (**1j**)

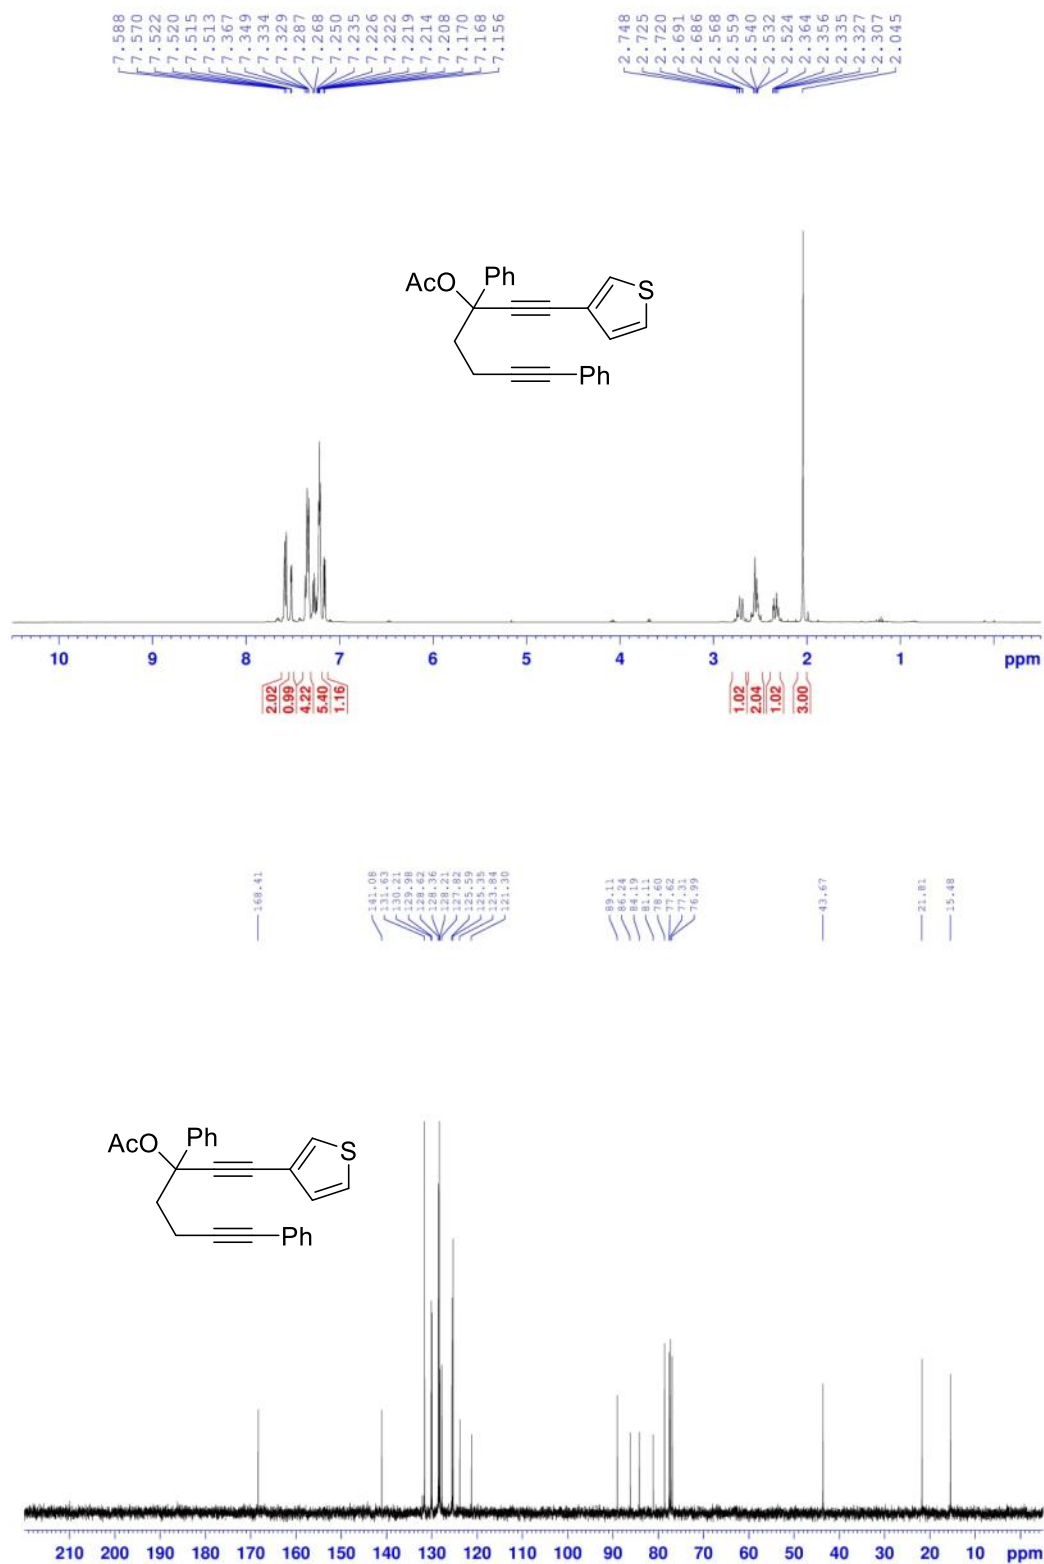

Figure S11.  $^1\text{H}$  and  $^{13}\text{C}\{^1\text{H}\}$  NMR spectra of 7-(4-fluorophenyl)-1,3-diphenylhepta-1,6-diyne-3-yl acetate (1k)

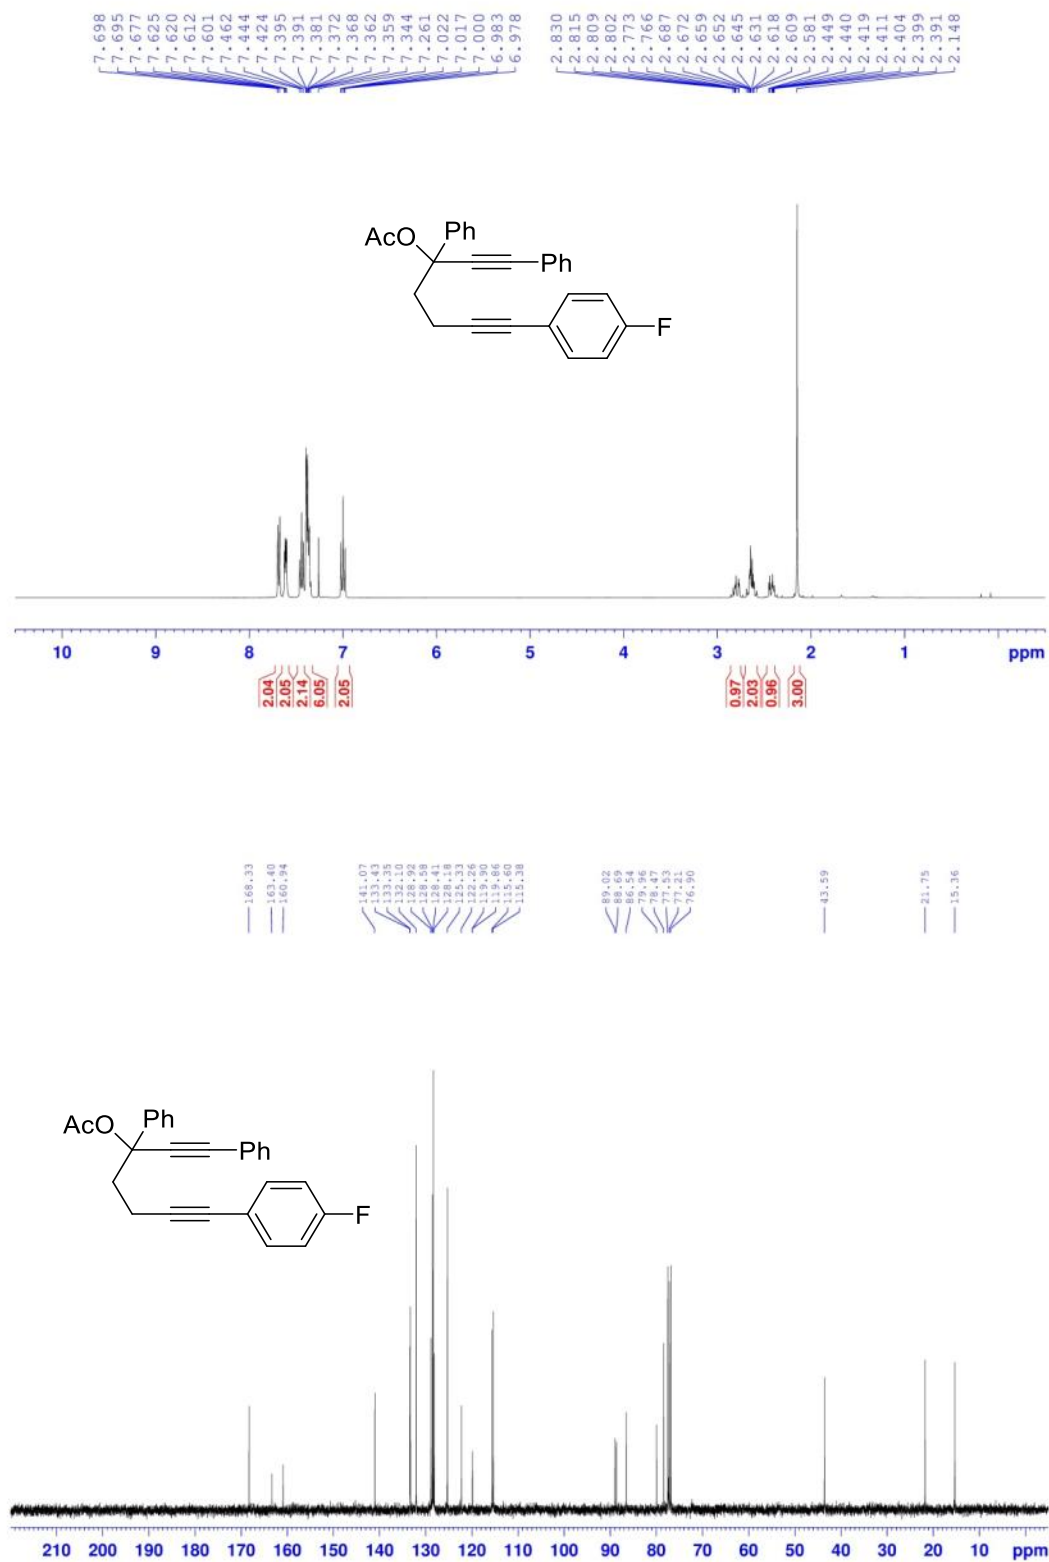

Figure S12.  $^1\text{H}$  and  $^{13}\text{C}\{^1\text{H}\}$  NMR spectra of 7-(4-bromophenyl)-1,3-diphenylhepta-1,6-diyne-3-yl acetate (II)

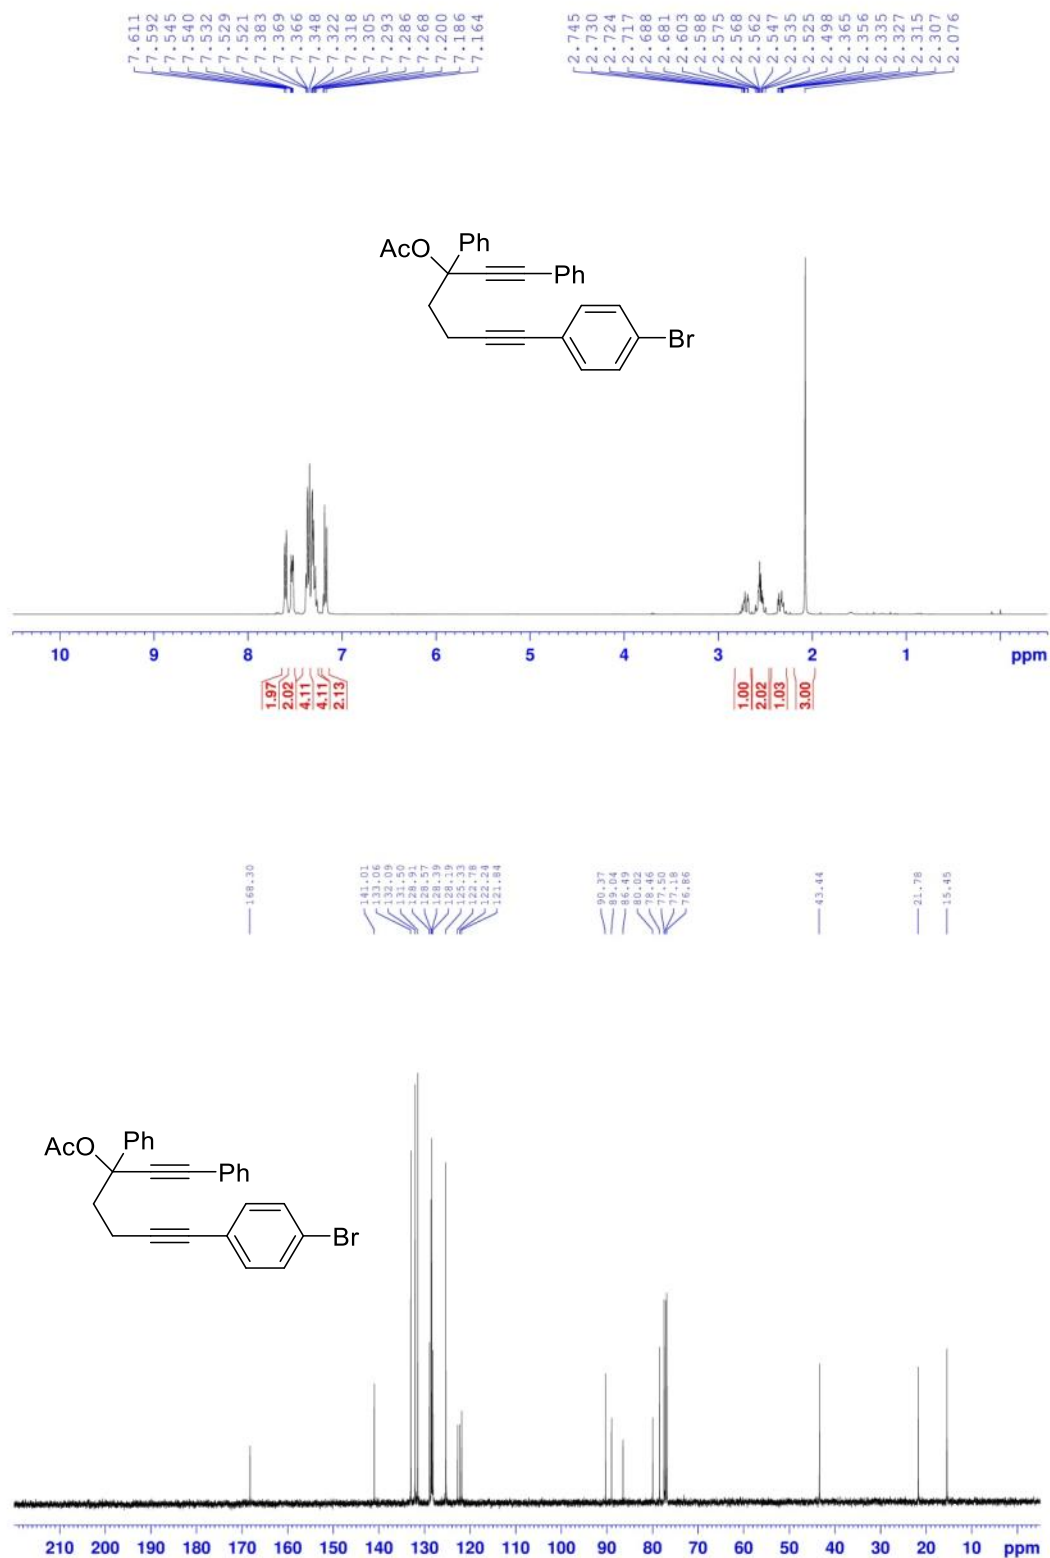

Figure S13.  $^1\text{H}$  and  $^{13}\text{C}\{^1\text{H}\}$  NMR spectra of 7-(4-pentylphenyl)-1,3-diphenylhepta-1,6-diyne-3-yl acetate(1m)

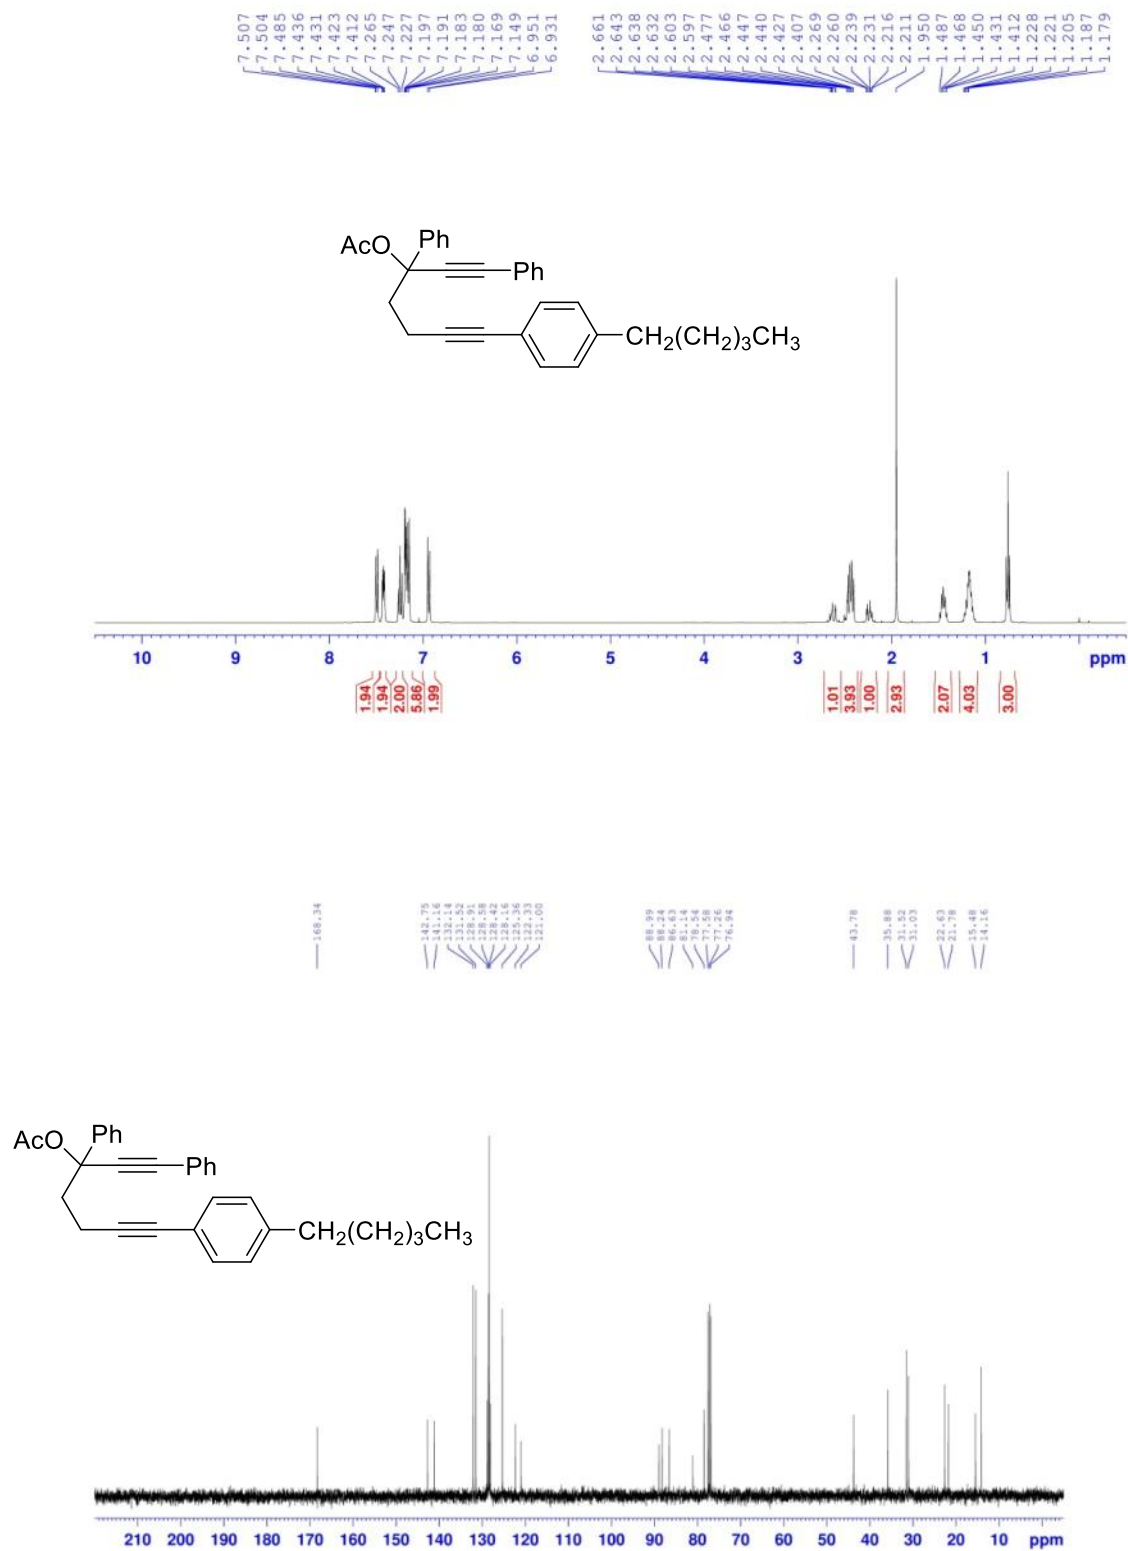

Figure S14.  $^1\text{H}$  and  $^{13}\text{C}\{^1\text{H}\}$  NMR spectra of 1,3-diphenyl-7-(p-tolyl)hepta-1,6-diyn-3-yl acetate (**1n**)

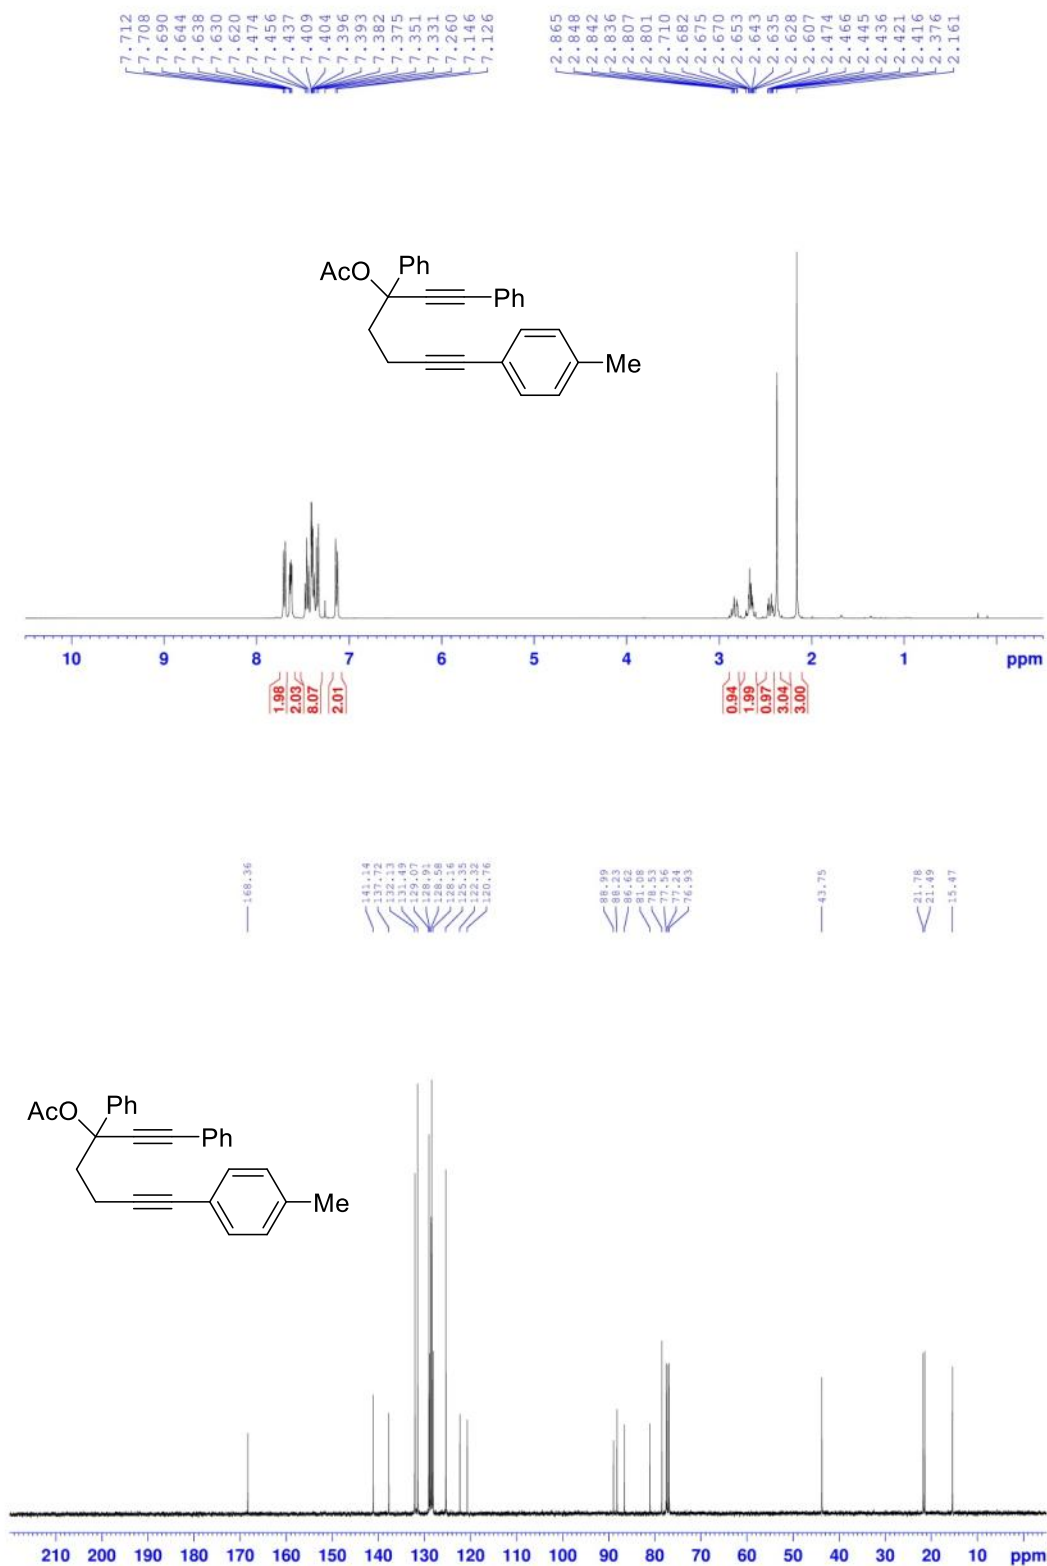



Figure S15.  $^1\text{H}$  and  $^{13}\text{C}\{^1\text{H}\}$  NMR spectra of 1,3-diphenyl-7-o-tolylhepta-1,6-diyn-3-yl acetate (**1o**)

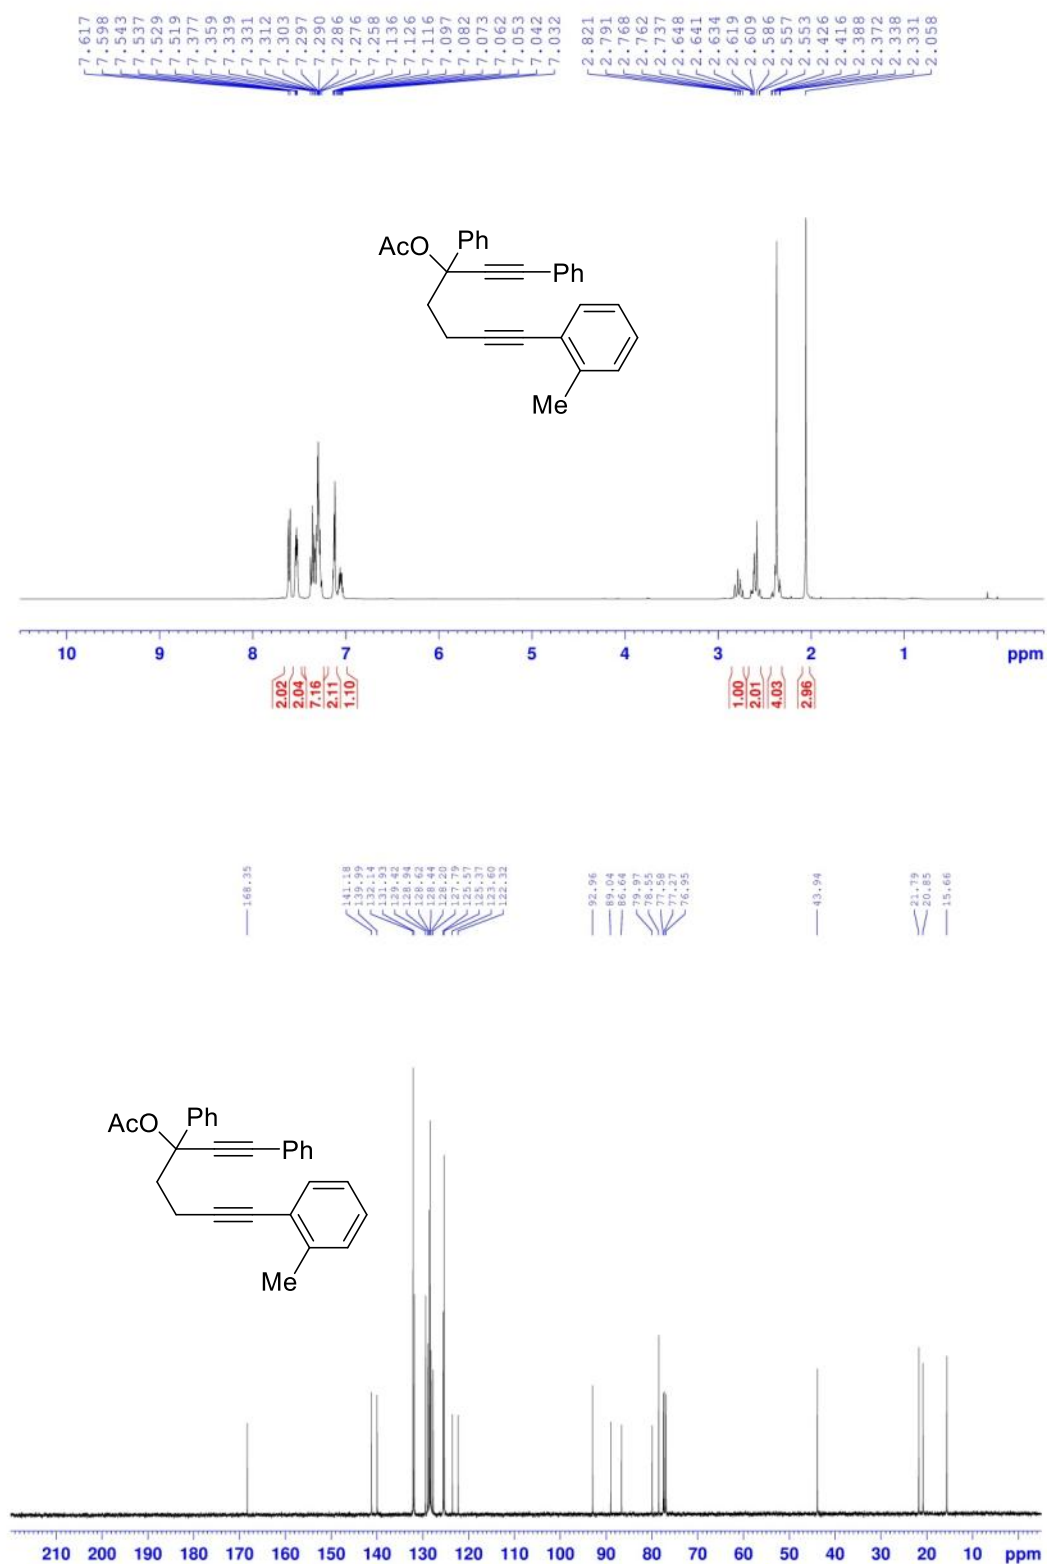

Figure S16.  $^1\text{H}$  and  $^{13}\text{C}\{^1\text{H}\}$  NMR spectra of 7-(3,5-dimethylphenyl)-1,3-diphenylhepta-1,6-diyn-3-yl acetate (1p)

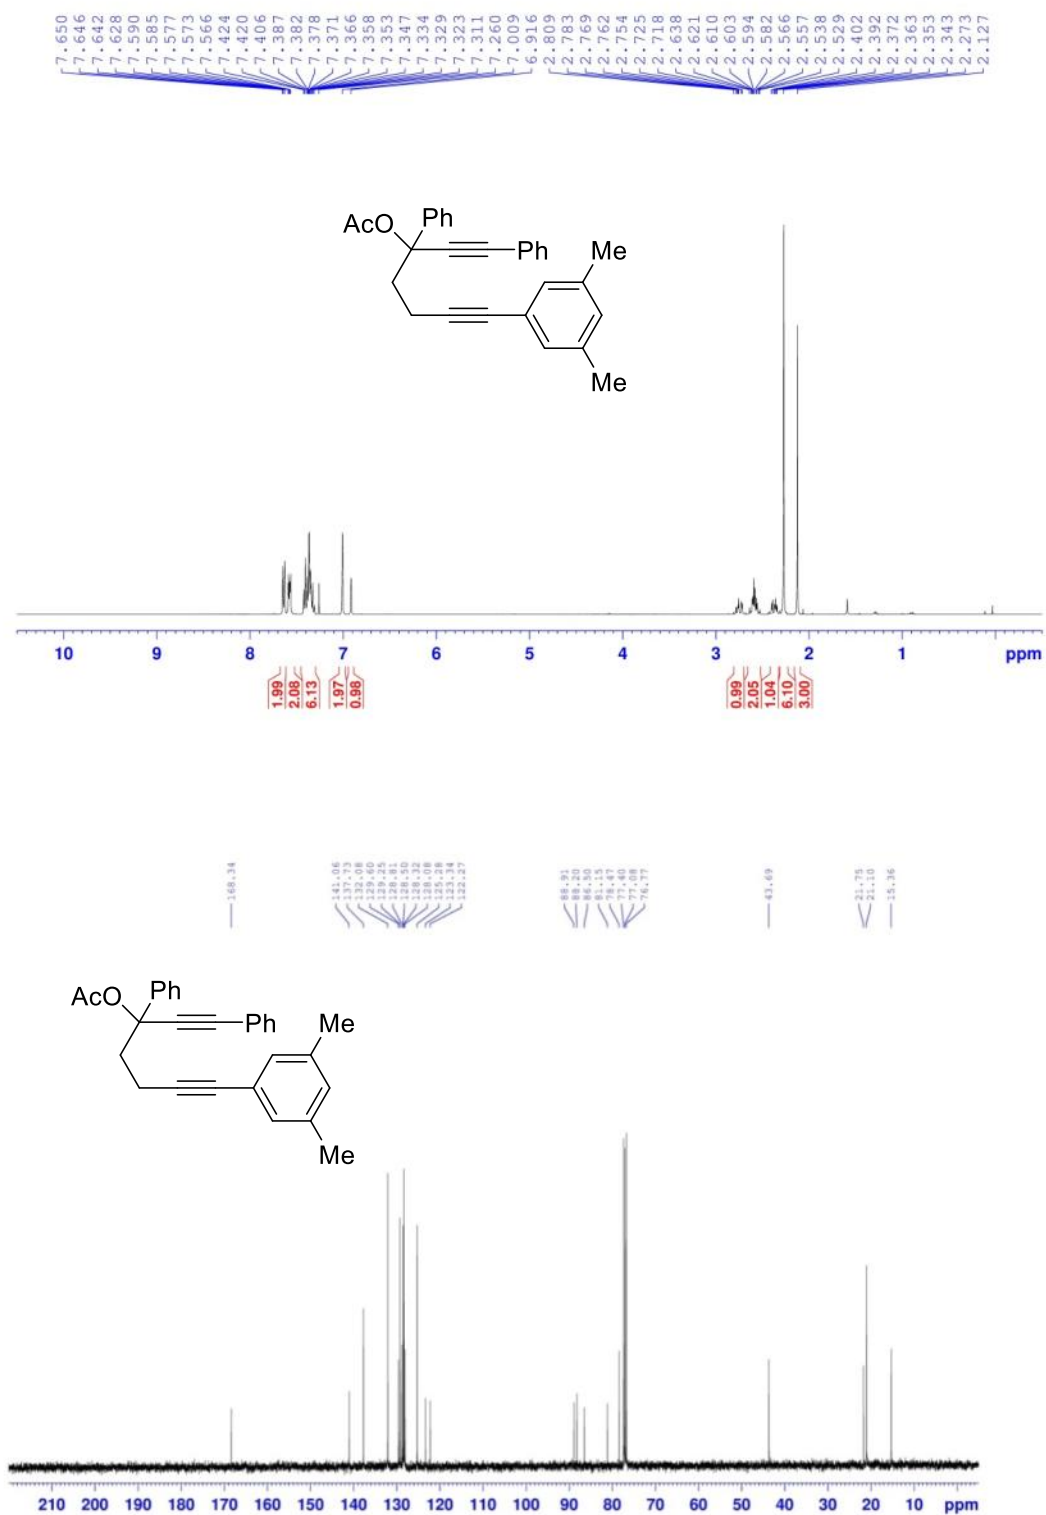

Figure S17.  $^1\text{H}$  and  $^{13}\text{C}\{^1\text{H}\}$  NMR spectra of 7-mesityl-1,3-diphenylhepta-1,6-diyn-3-yl acetate (**1q**)

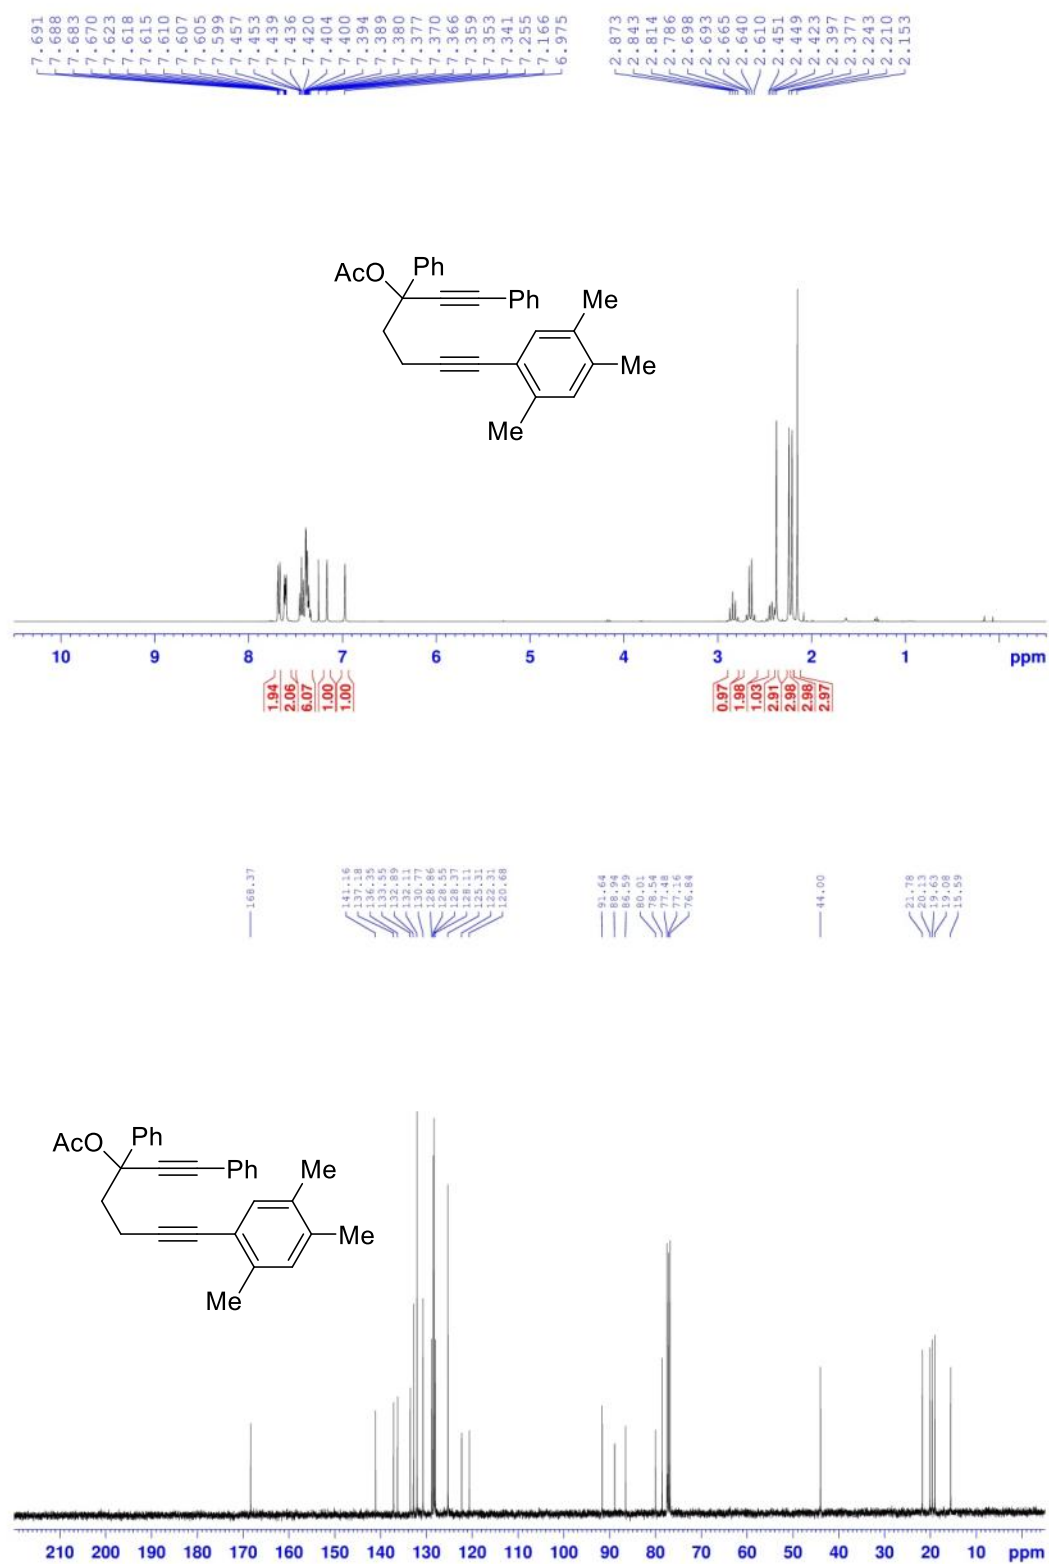

**Figure S18.  $^1\text{H}$  and  $^{13}\text{C}\{^1\text{H}\}$  NMR spectra of 7-(naphthalen-1-yl)-1,3-diphenylhepta-1,6-diyn-3-yl acetate (1r)**

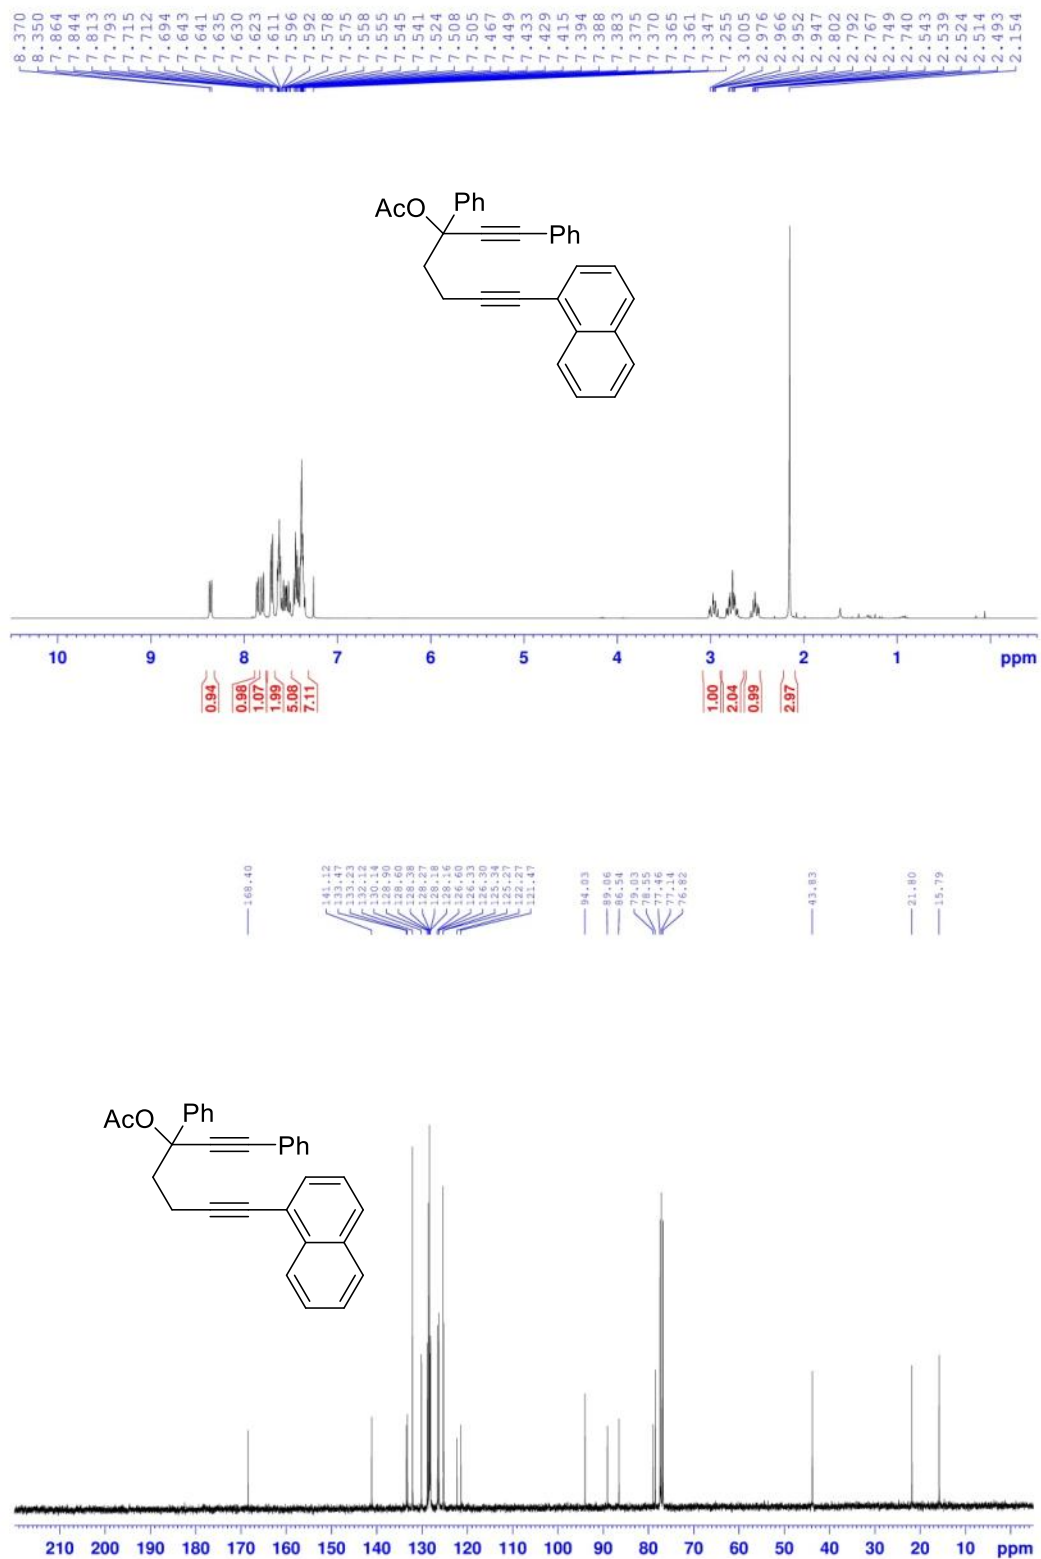

Figure S19.  $^1\text{H}$  and  $^{13}\text{C}\{^1\text{H}\}$  NMR spectra of 1,3-diphenyl-7-(thiophen-3-yl)hepta-1,6-diyn-3-yl acetate (**1s**)

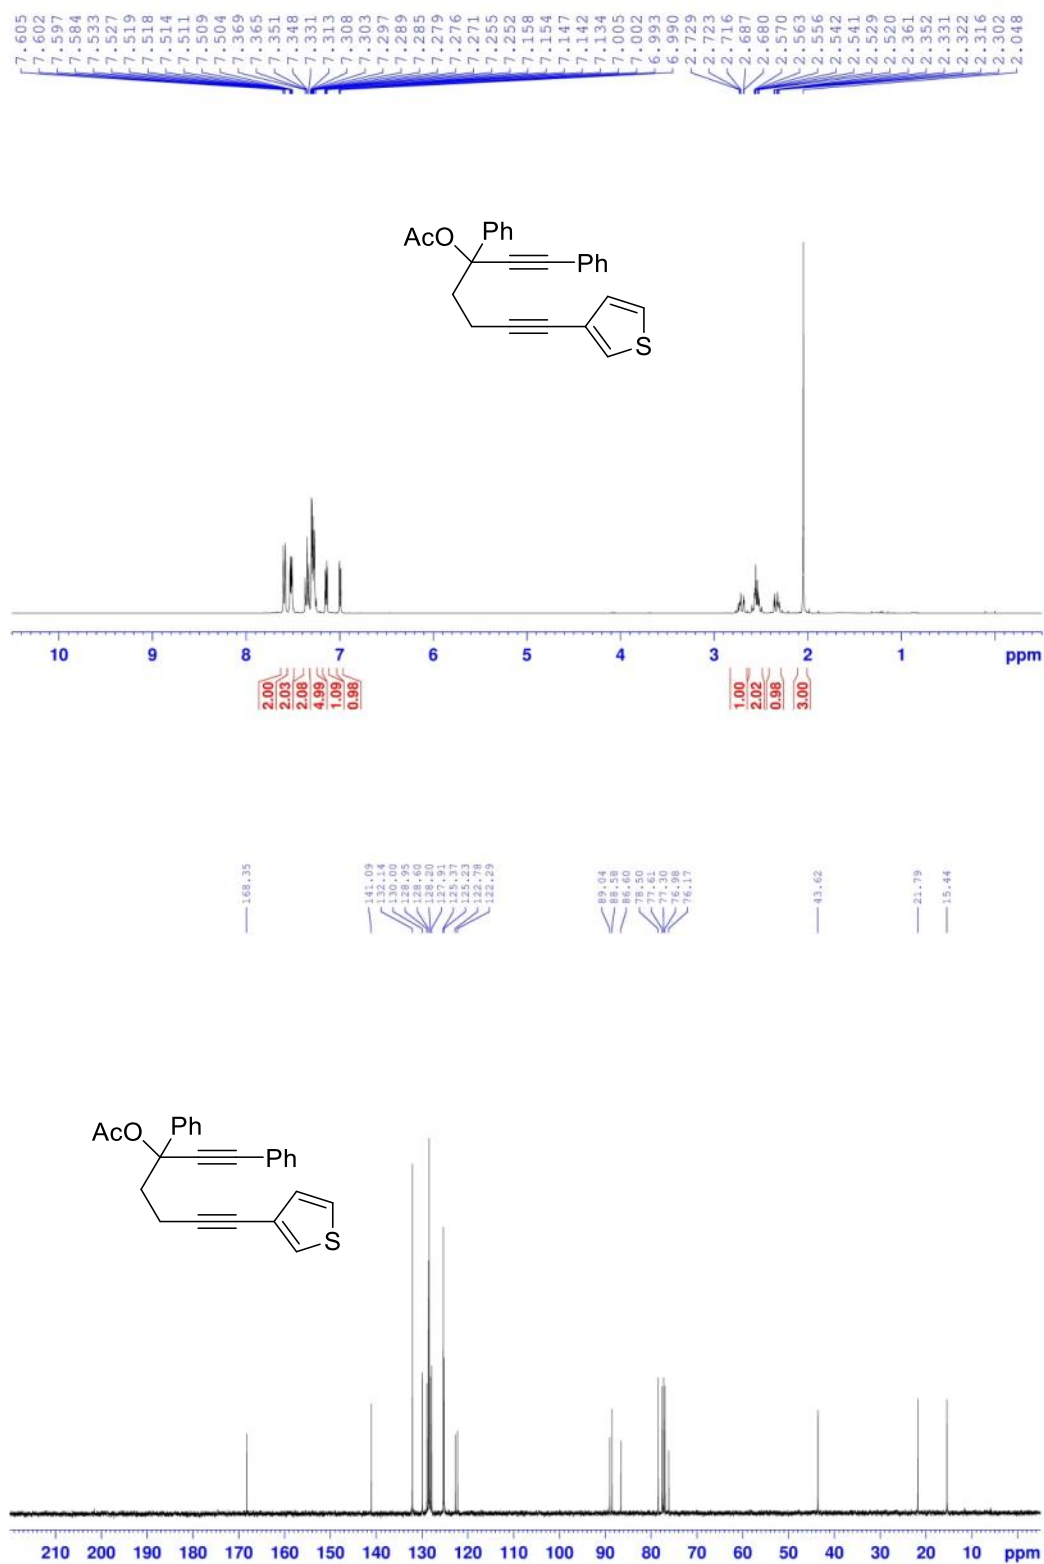

Figure S20.  $^1\text{H}$  and  $^{13}\text{C}\{^1\text{H}\}$  NMR spectra of 1,3-diphenyl-7-(thiophen-2-yl)hepta-1,6-diyn-3-yl acetate (1t)

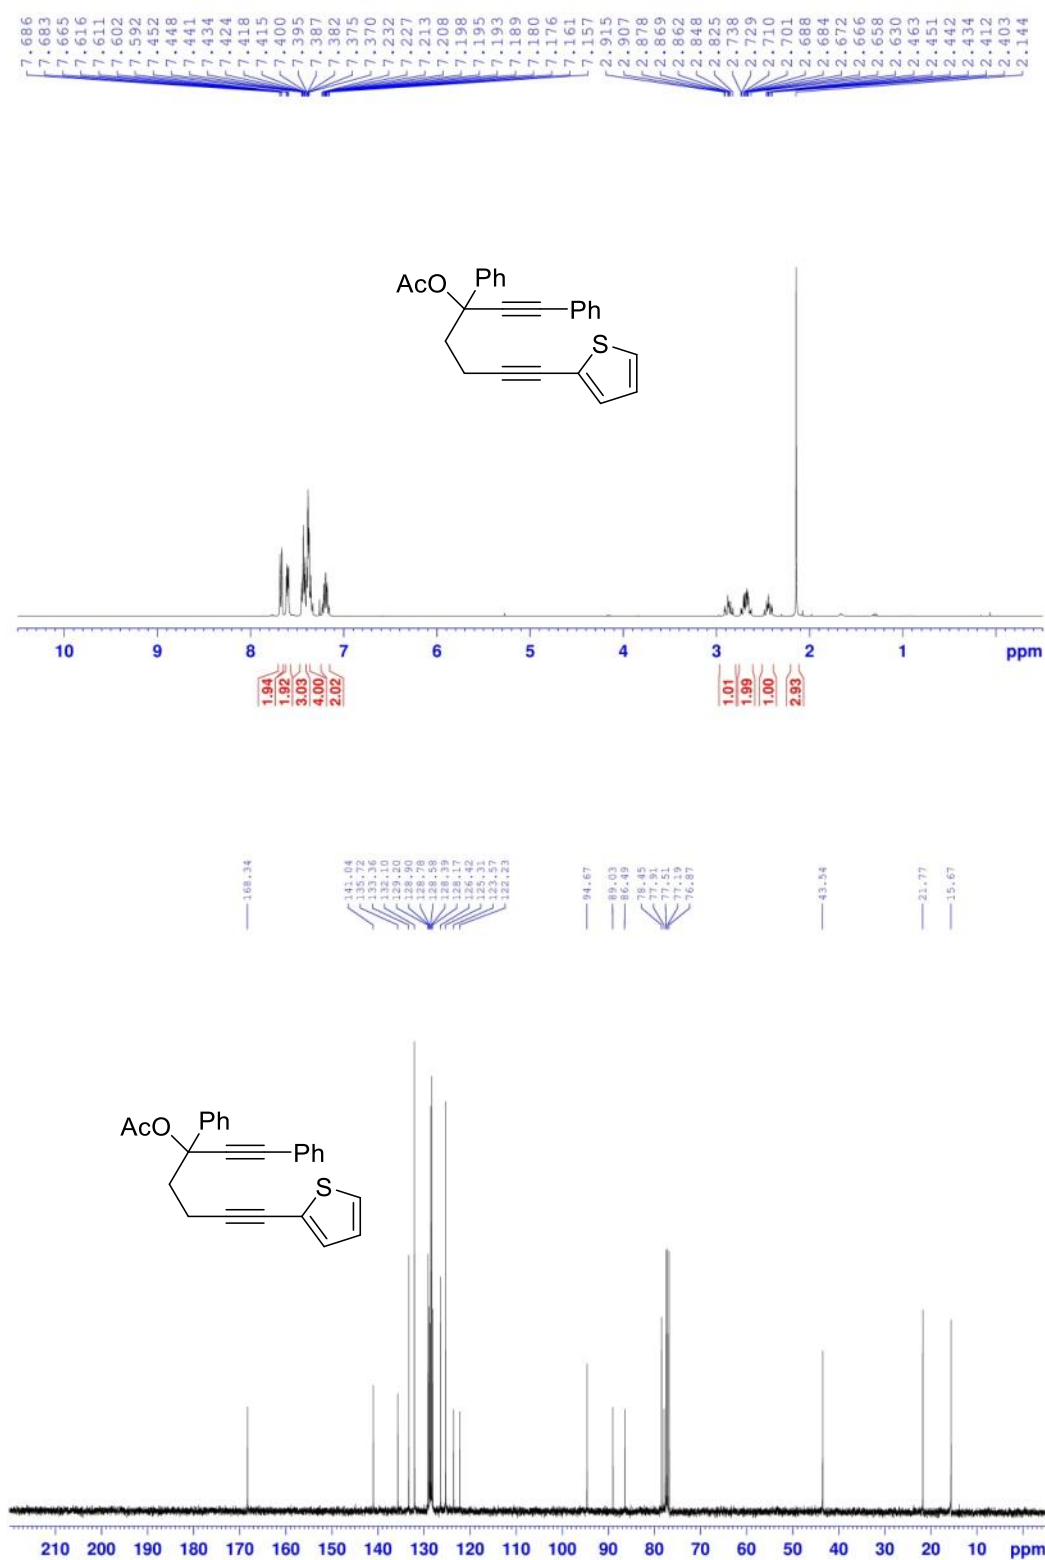

Figure S21.  $^1\text{H}$  and  $^{13}\text{C}\{^1\text{H}\}$  NMR spectra of 2-methyl-5,9-diphenylnona-1-en-3,8-diyn-5-yl acetate (1u)

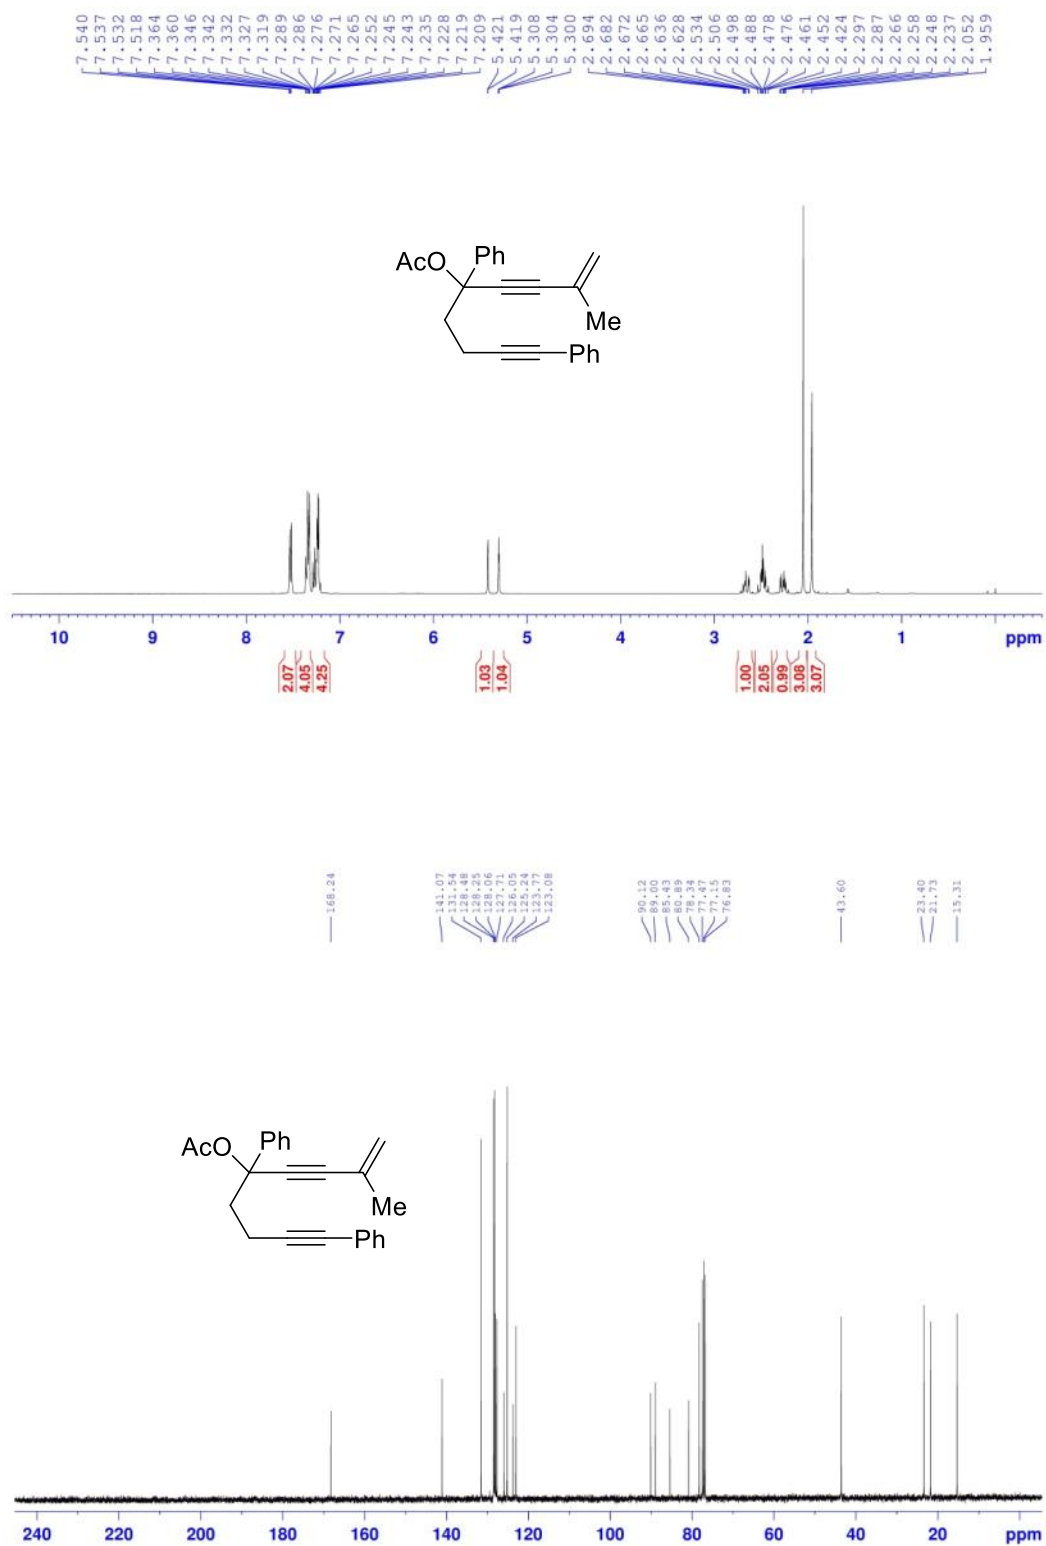

Figure S22.  $^1\text{H}$  and  $^{13}\text{C}\{^1\text{H}\}$  NMR spectra of 2-methyl-5,9-diphenylnona-1-en-3,8-diyn-5-yl benzoate (**1v**)

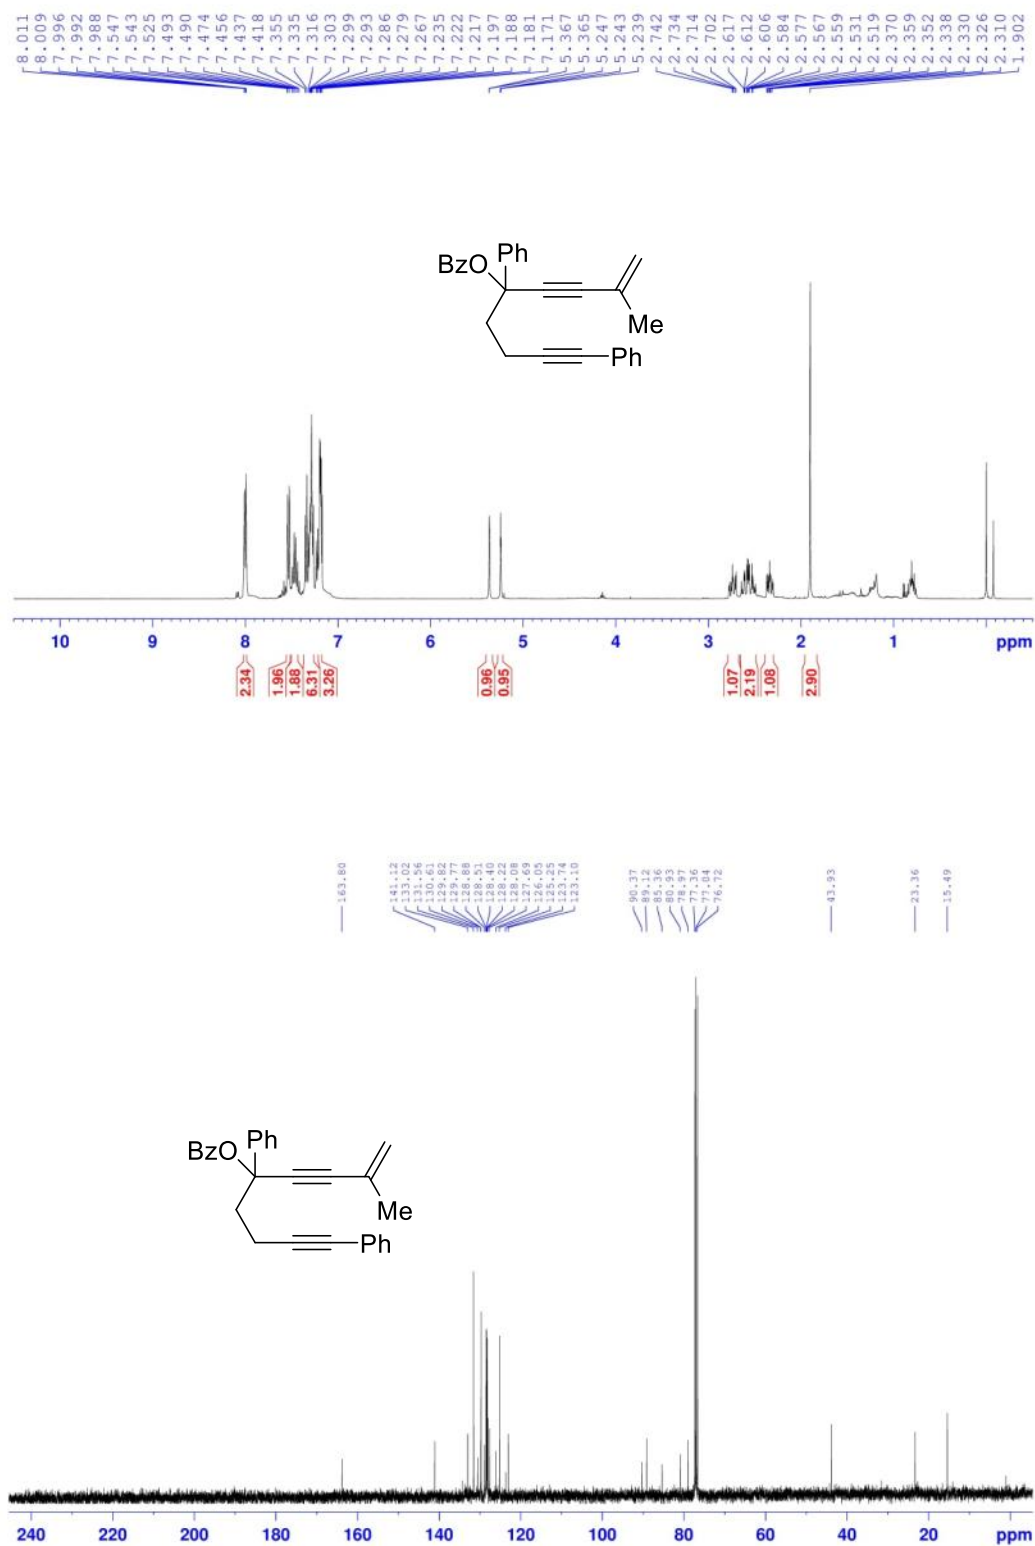



Figure S23.  $^1\text{H}$  and  $^{13}\text{C}\{^1\text{H}\}$  NMR spectra of 2-methyl-5,9-diphenylnona-1-en-3,8-diyn-5-yl pivalate (1w)

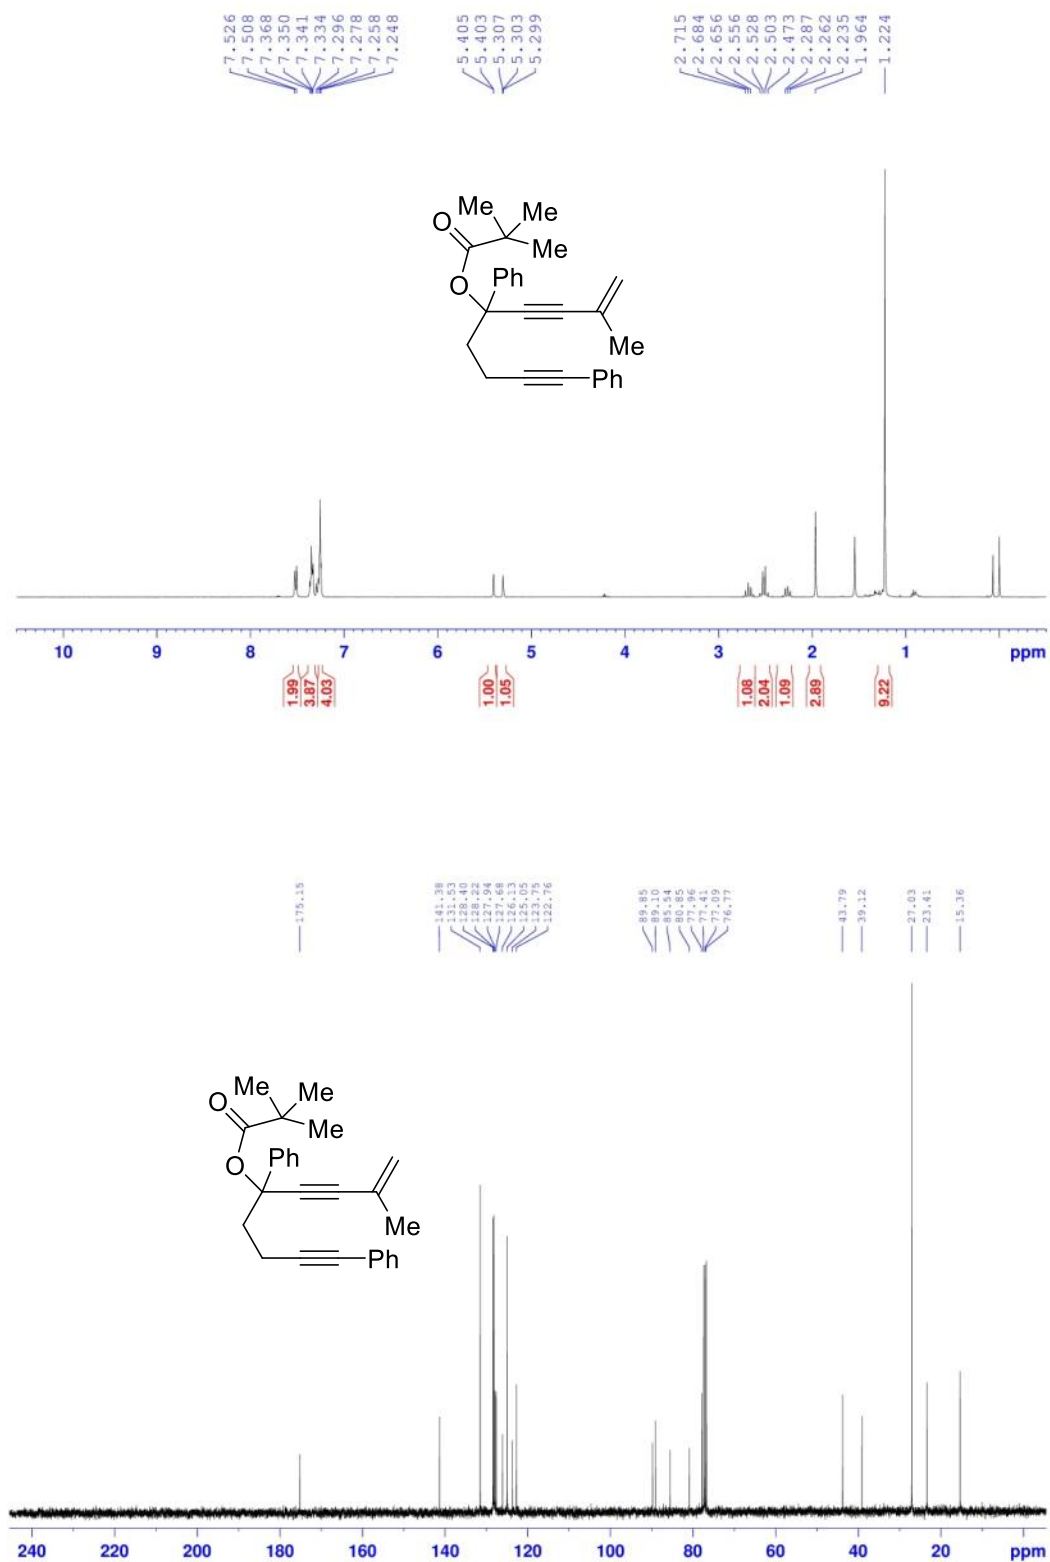

**Figure S24.  $^1\text{H}$  and  $^{13}\text{C}\{^1\text{H}\}$  NMR spectra of 2-methyl-5,9-diphenylnona-1-en-3,8-diyn-5-yl cyclopropanecarboxylate (1x)**

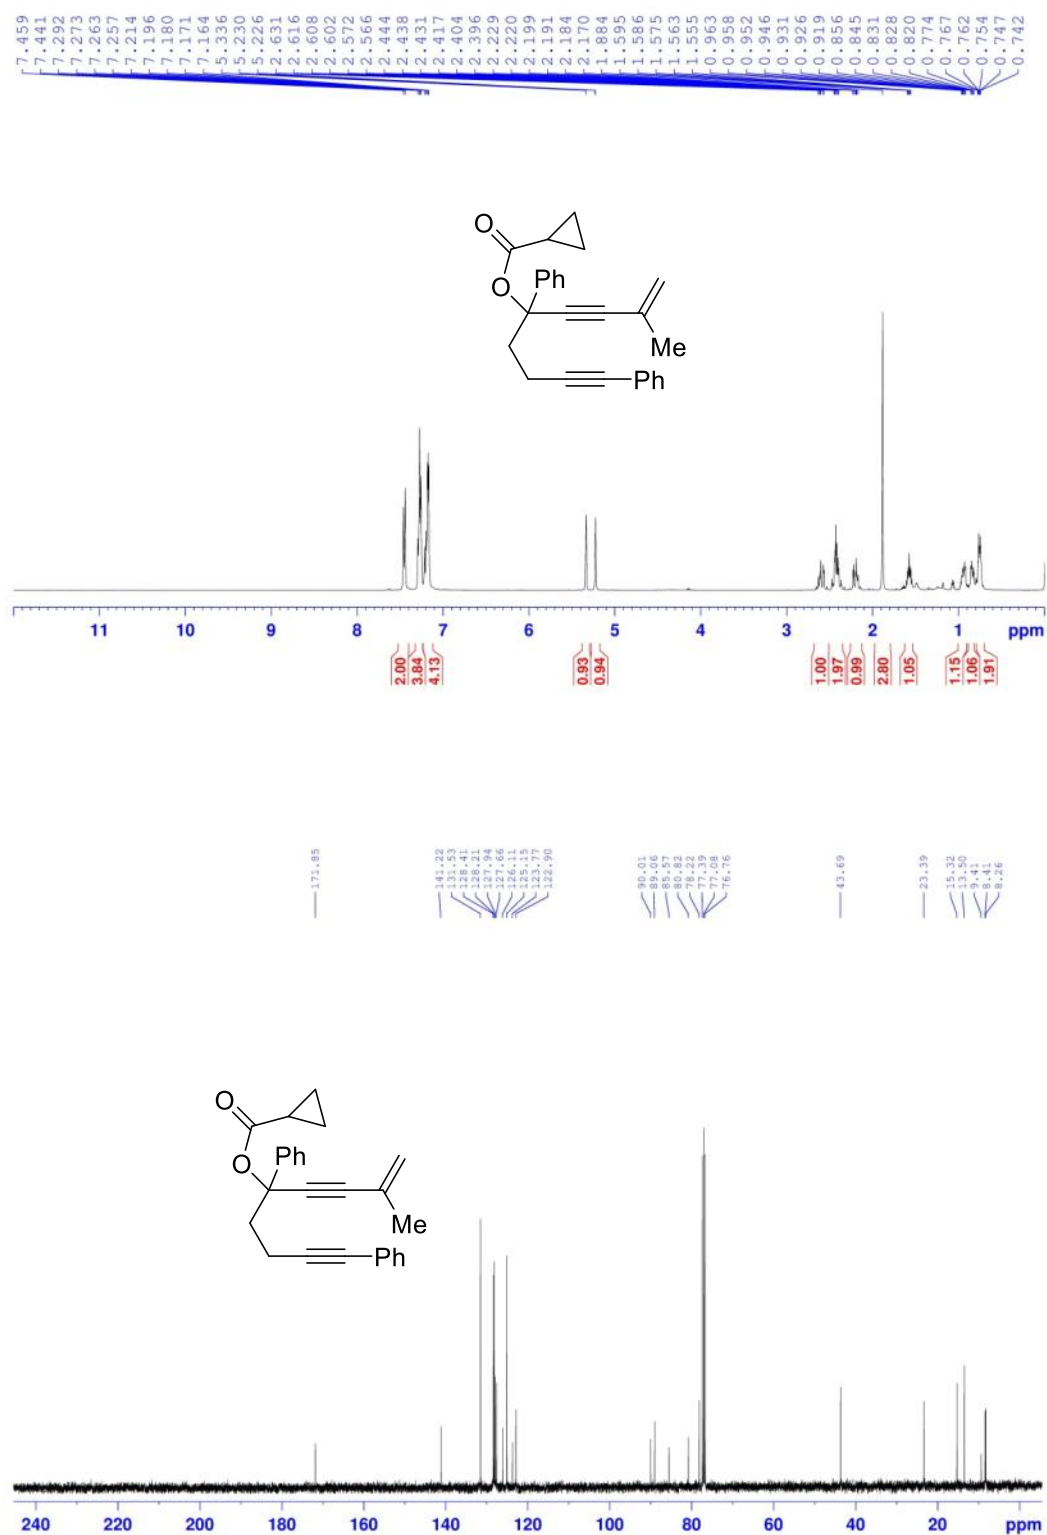

Figure S25.  $^1\text{H}$  and  $^{13}\text{C}\{^1\text{H}\}$  NMR spectra of 5-(4-chlorophenyl)-2-methyl-9-phenylnona-1-en-3,8-diyn-5-yl acetate (1y)

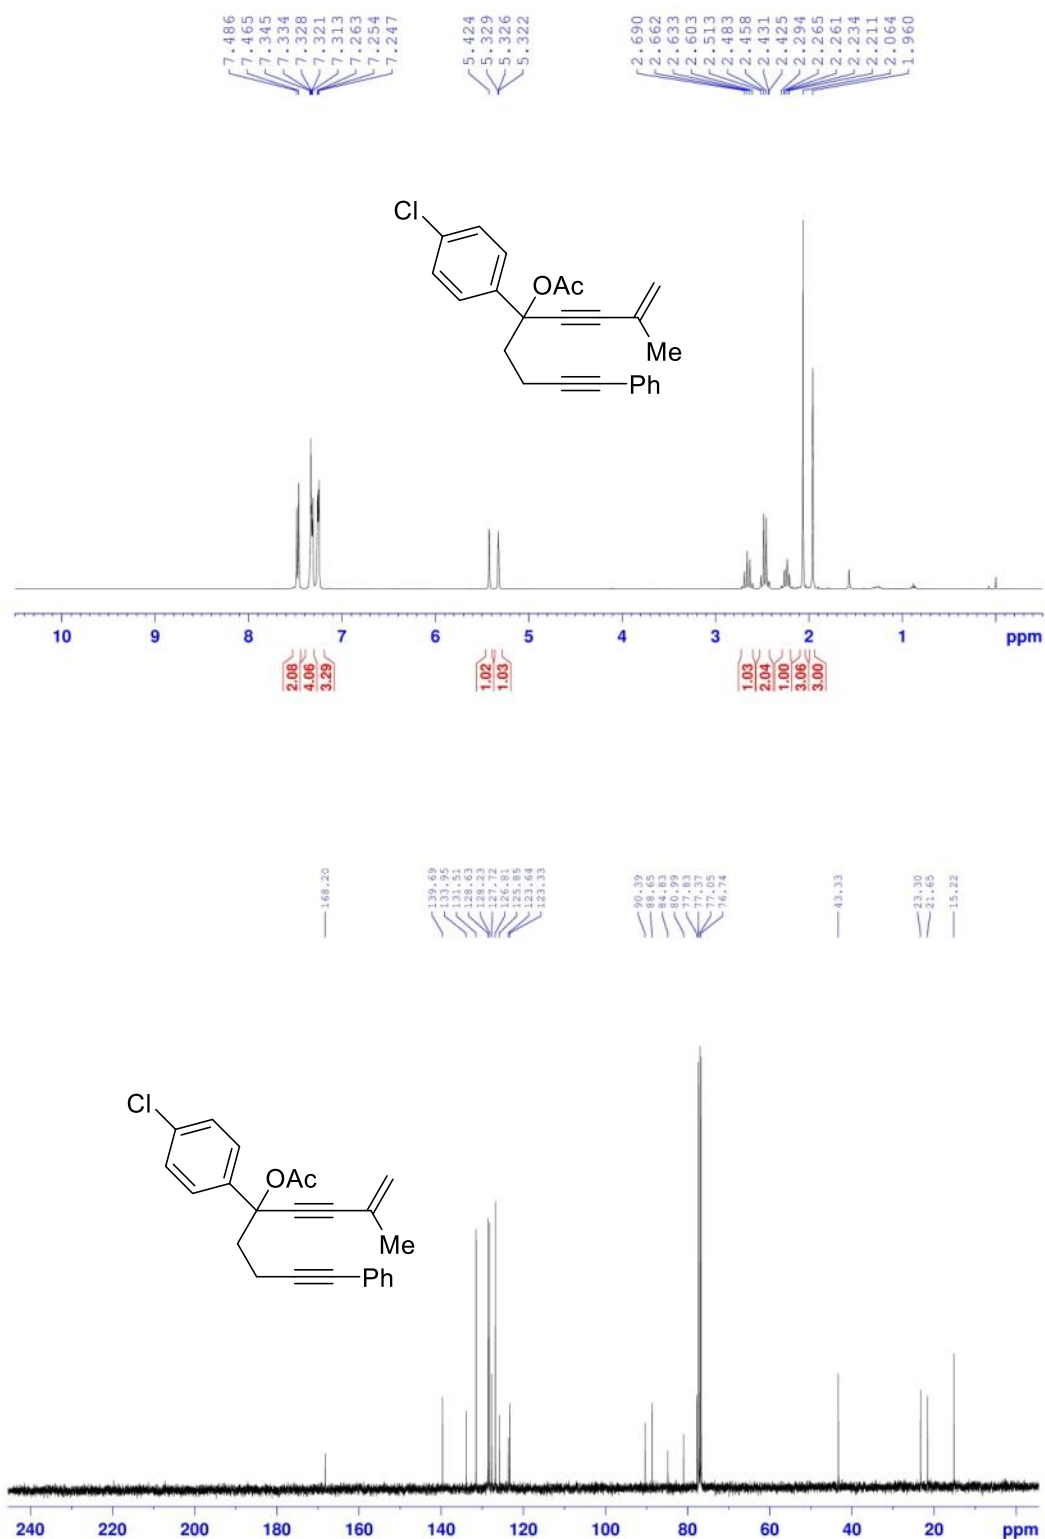

Figure S26.  $^1\text{H}$  and  $^{13}\text{C}\{^1\text{H}\}$  NMR spectra of 2-methyl-9-phenyl-5-p-tolylnona-1-en-3,8-diyn-5-yl acetate (**1z**)

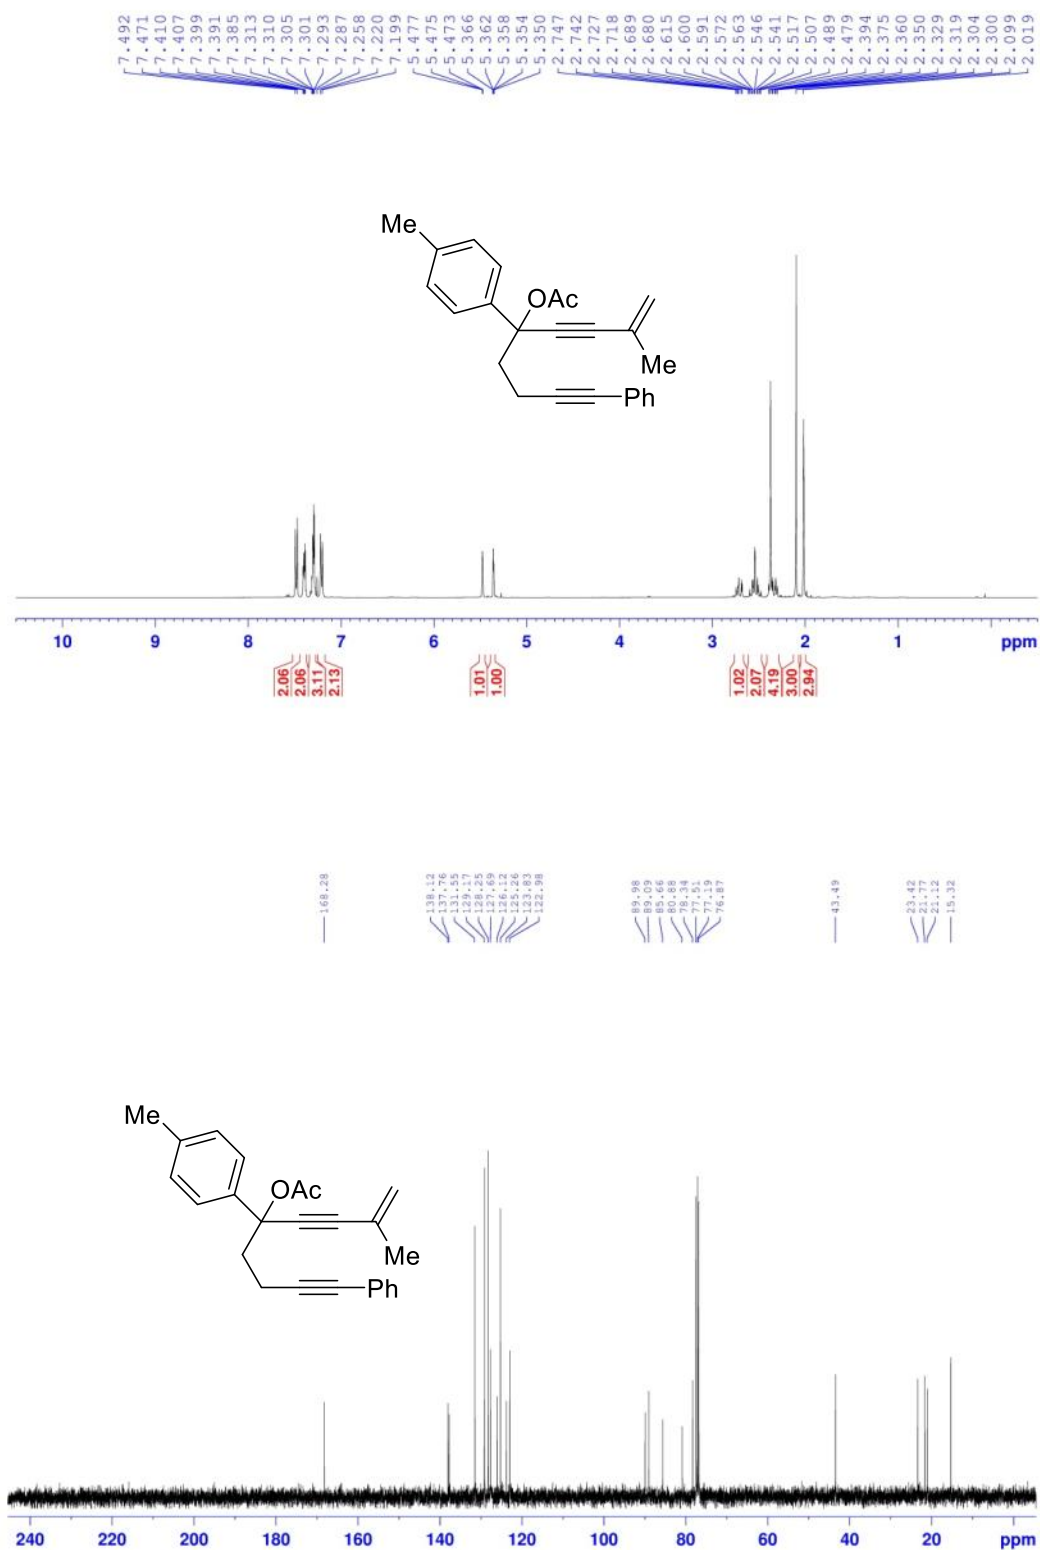

Figure S27.  $^1\text{H}$  and  $^{13}\text{C}\{^1\text{H}\}$  NMR spectra of 2-methyl-5-(naphthalen-1-yl)-9-phenylnona-1-en-3,8-diyn-5-yl acetate (**1a**)

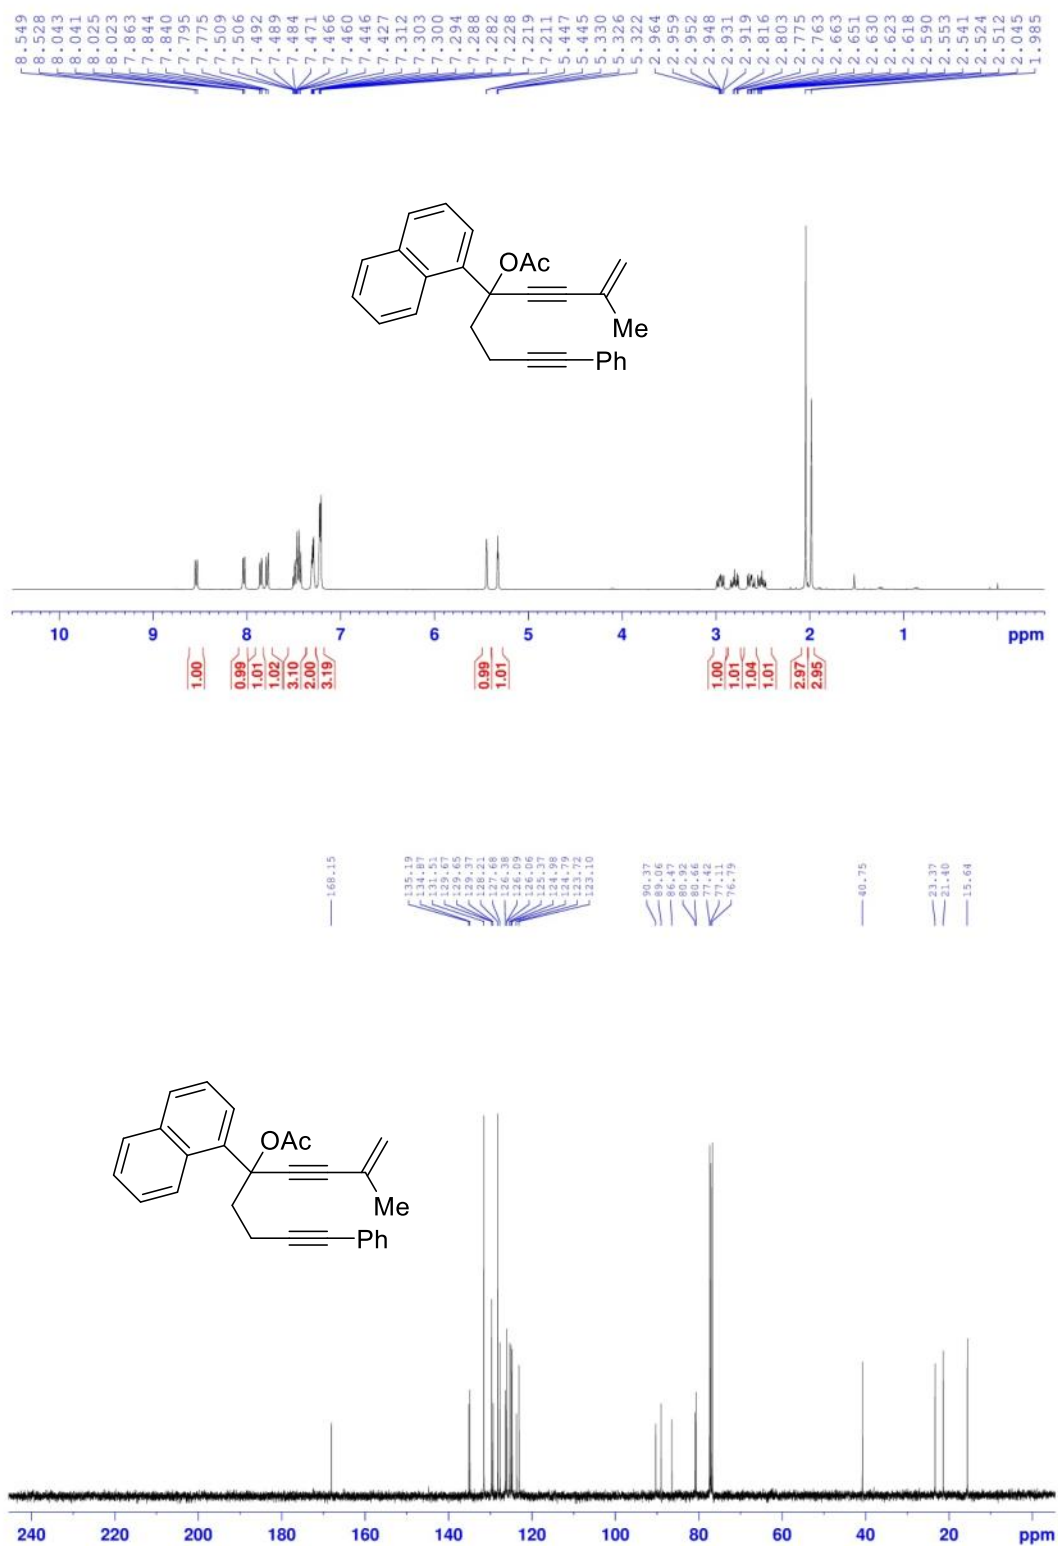

Figure S28.  $^1\text{H}$  and  $^{13}\text{C}\{^1\text{H}\}$  NMR spectra of 2,5-dimethyl-9-phenylnona-1-en-3,8-diyn-5-yl acetate (**1 $\beta$** )

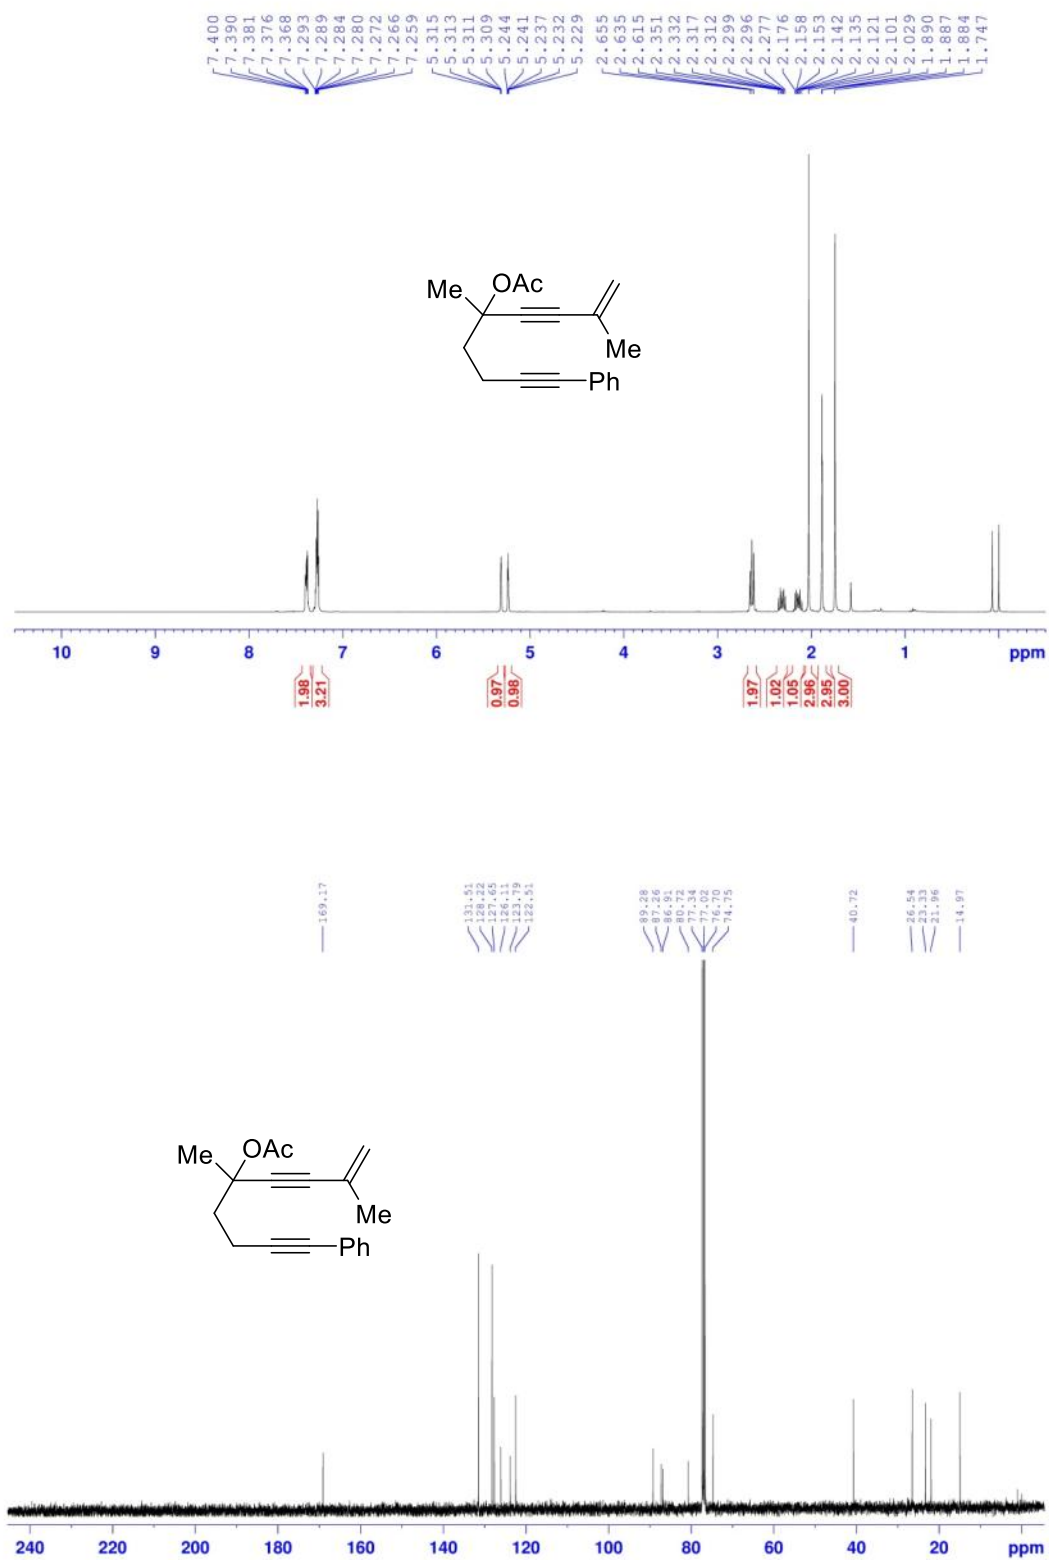

Figure S29.  $^1\text{H}$  and  $^{13}\text{C}\{^1\text{H}\}$  NMR spectra of 8-methylene-1,5-diphenyltetradeca-1,6-diyne-5-yl acetate (**1y**)

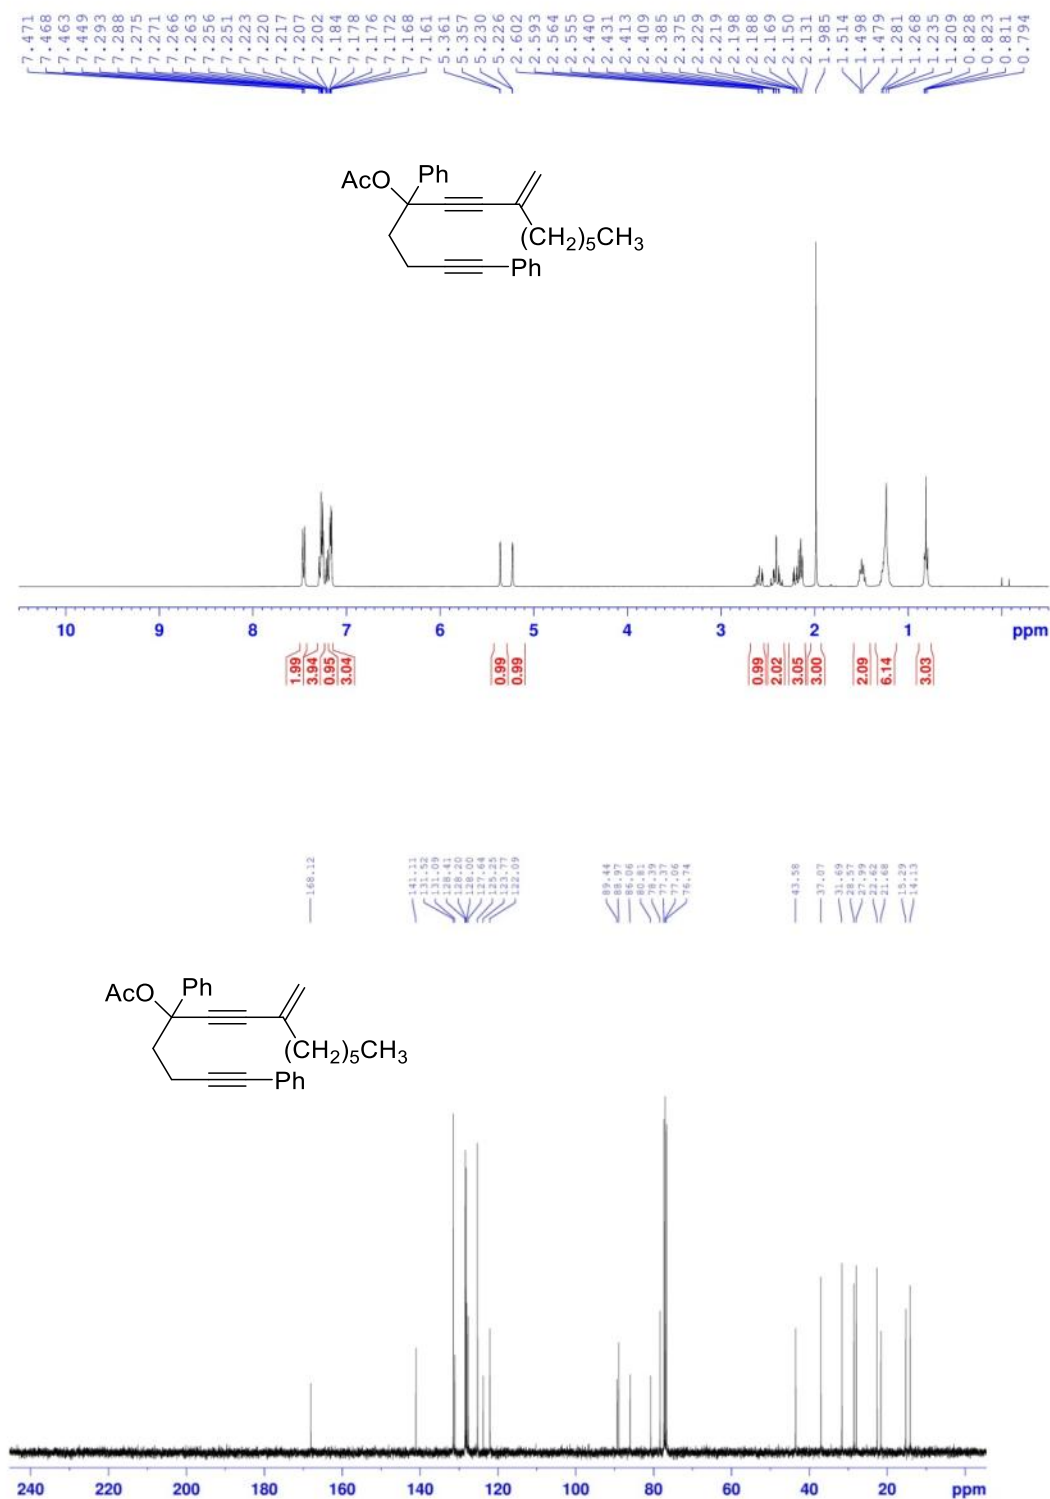

**acetate (1δ)**

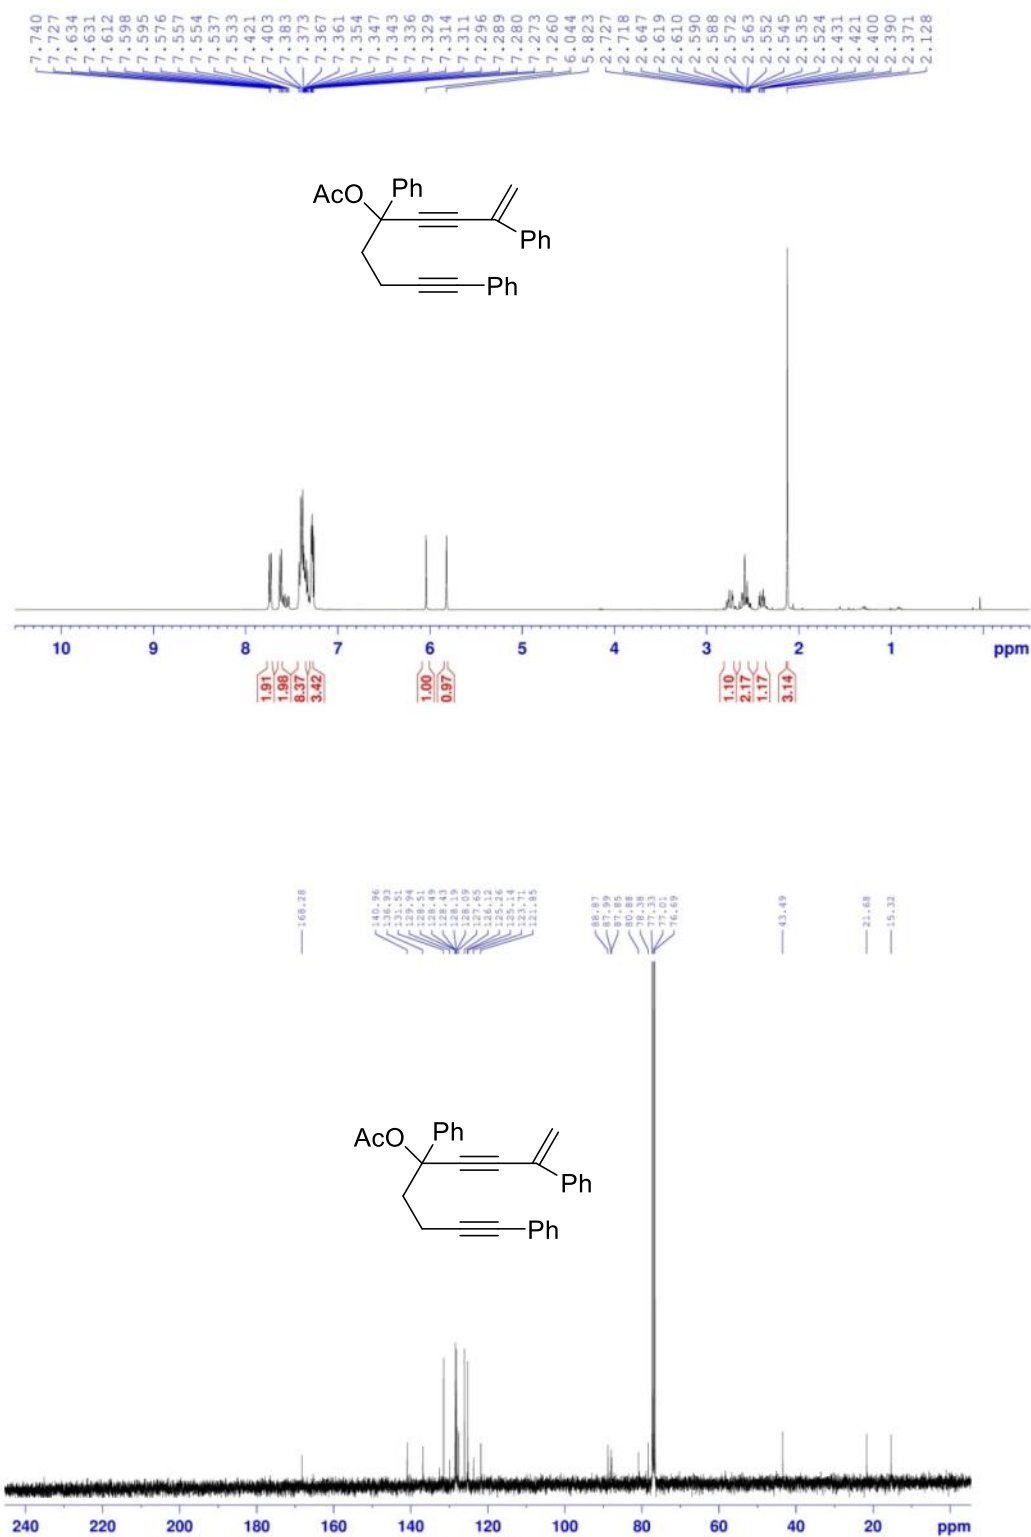



Figure S31.  $^1\text{H}$  and  $^{13}\text{C}\{^1\text{H}\}$  NMR spectra of 9-(4-fluorophenyl)-2-methyl-5-phenylnona-1-en-3,8-diyn-5-yl acetate (**1e**)

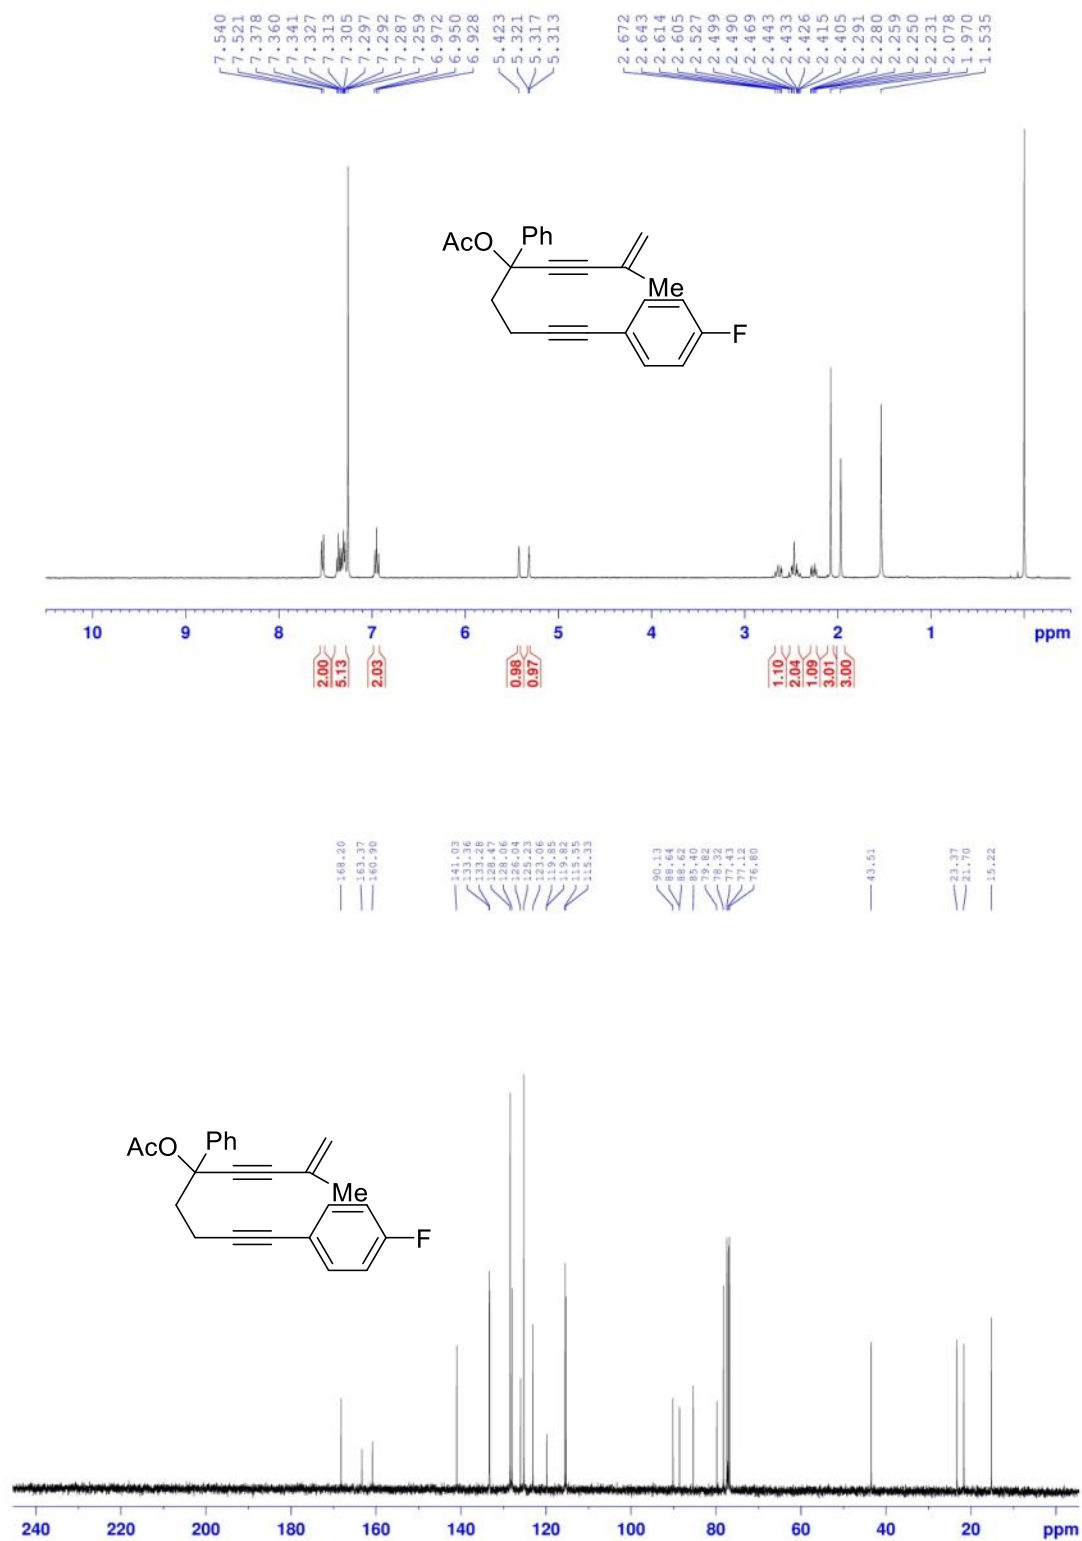

Figure S32.  $^1\text{H}$  and  $^{13}\text{C}\{^1\text{H}\}$  NMR spectra of 2-methyl-5-phenyl-9-p-tolynona-1-en-3,8-diyn-5-yl acetate (**1c**)

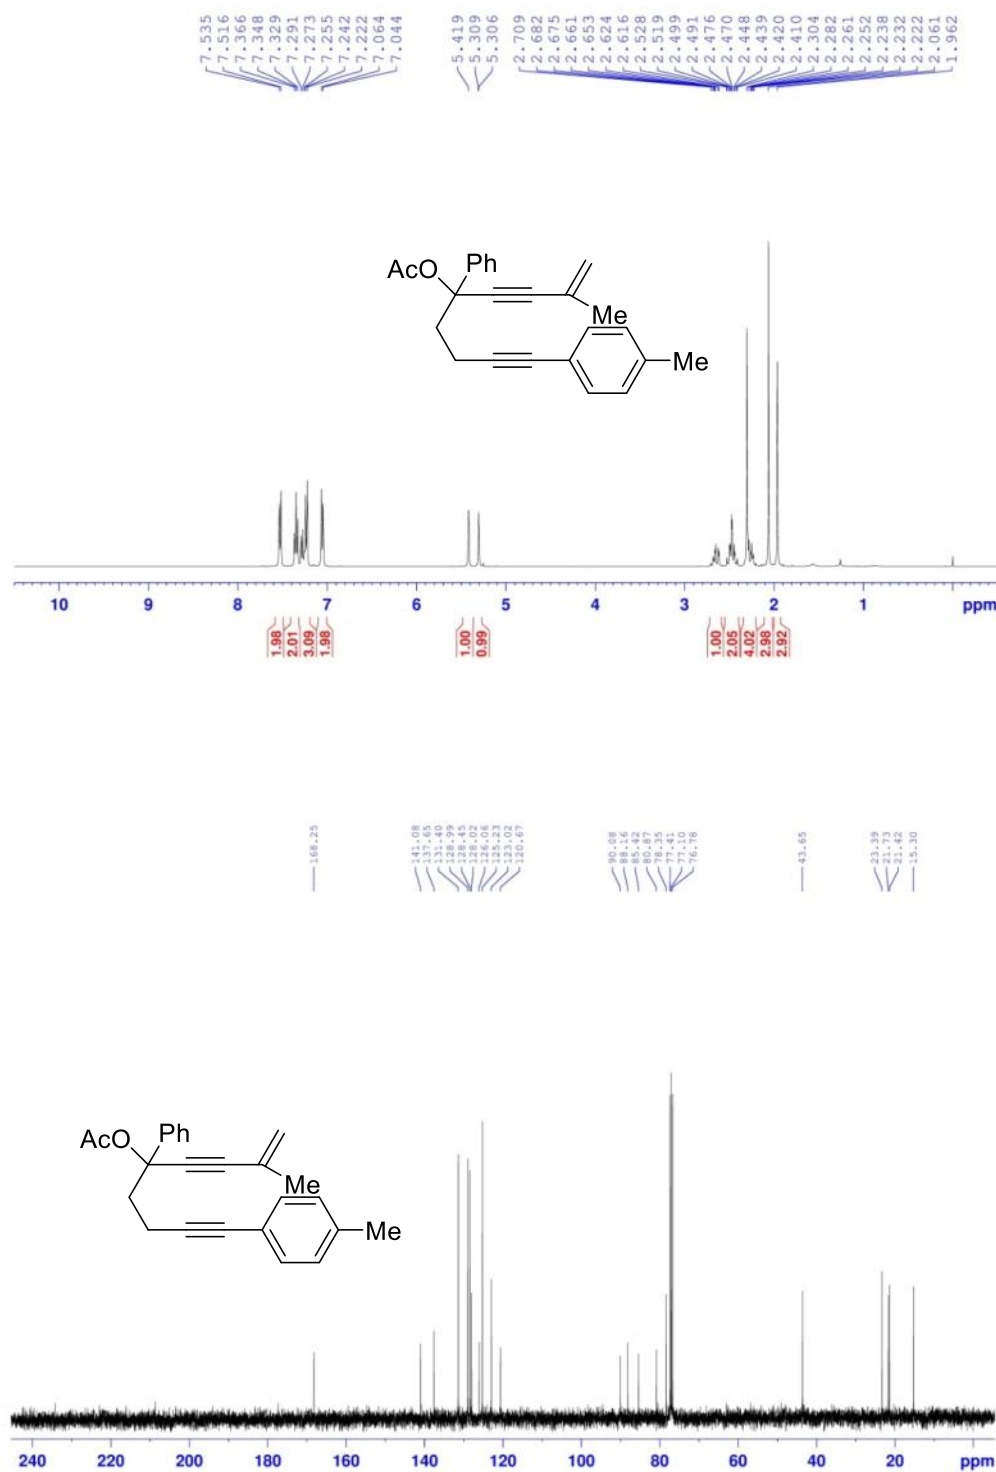

Figure S33.  $^1\text{H}$  and  $^{13}\text{C}\{^1\text{H}\}$  NMR spectra of 2-methyl-9-(4-pentylphenyl)-5-phenylnona-1-en-3,8-diyn-5-yl acetate (**1n**)

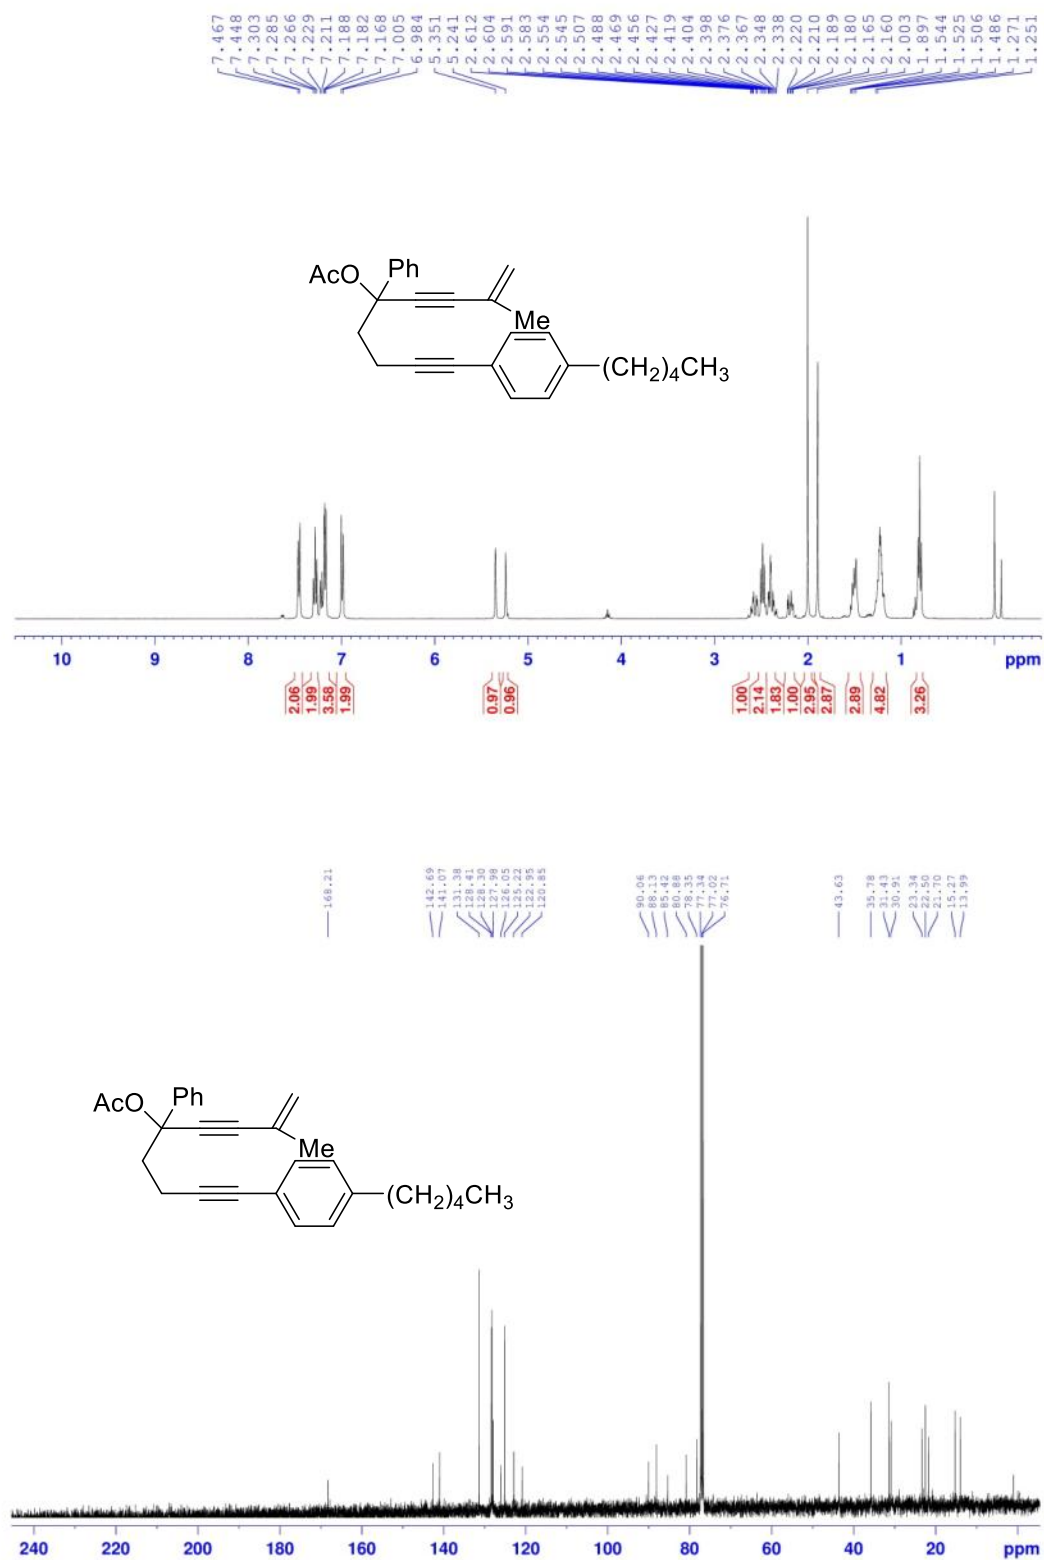

**5-yl acetate (10)**

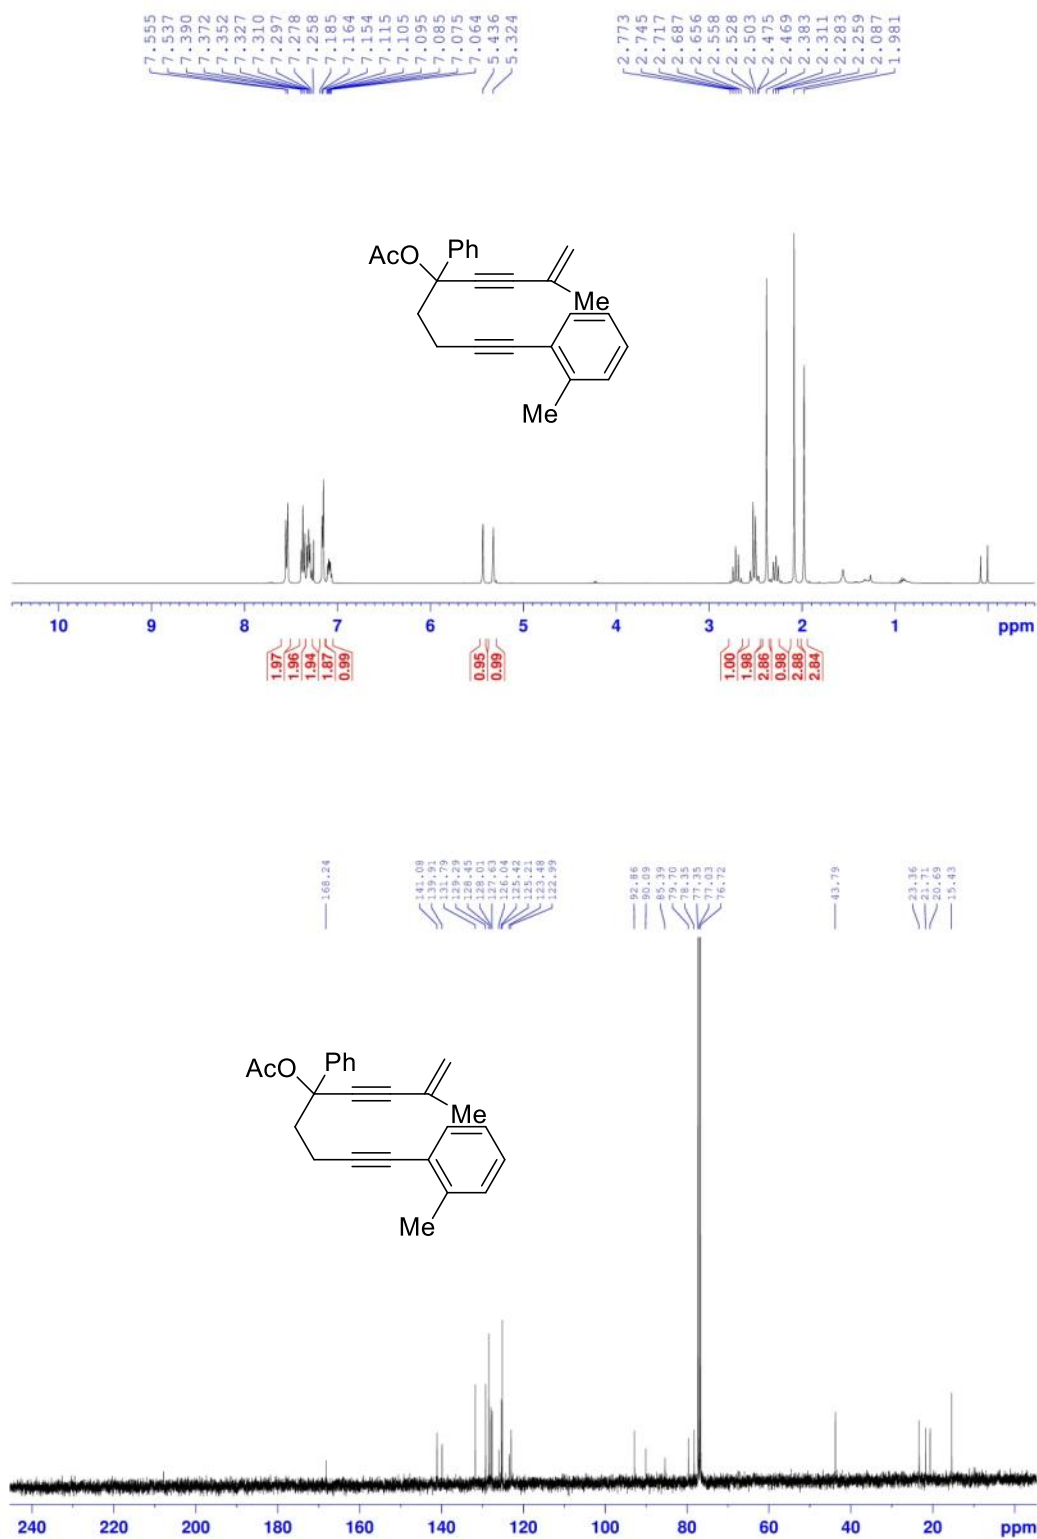

**Figure S35.  $^1\text{H}$  and  $^{13}\text{C}\{^1\text{H}\}$  NMR spectra of 9-(3,5-dimethylphenyl)-2-methyl-5-phenylnona-1-en-3,8-diyn-5-yl acetate (1i)**

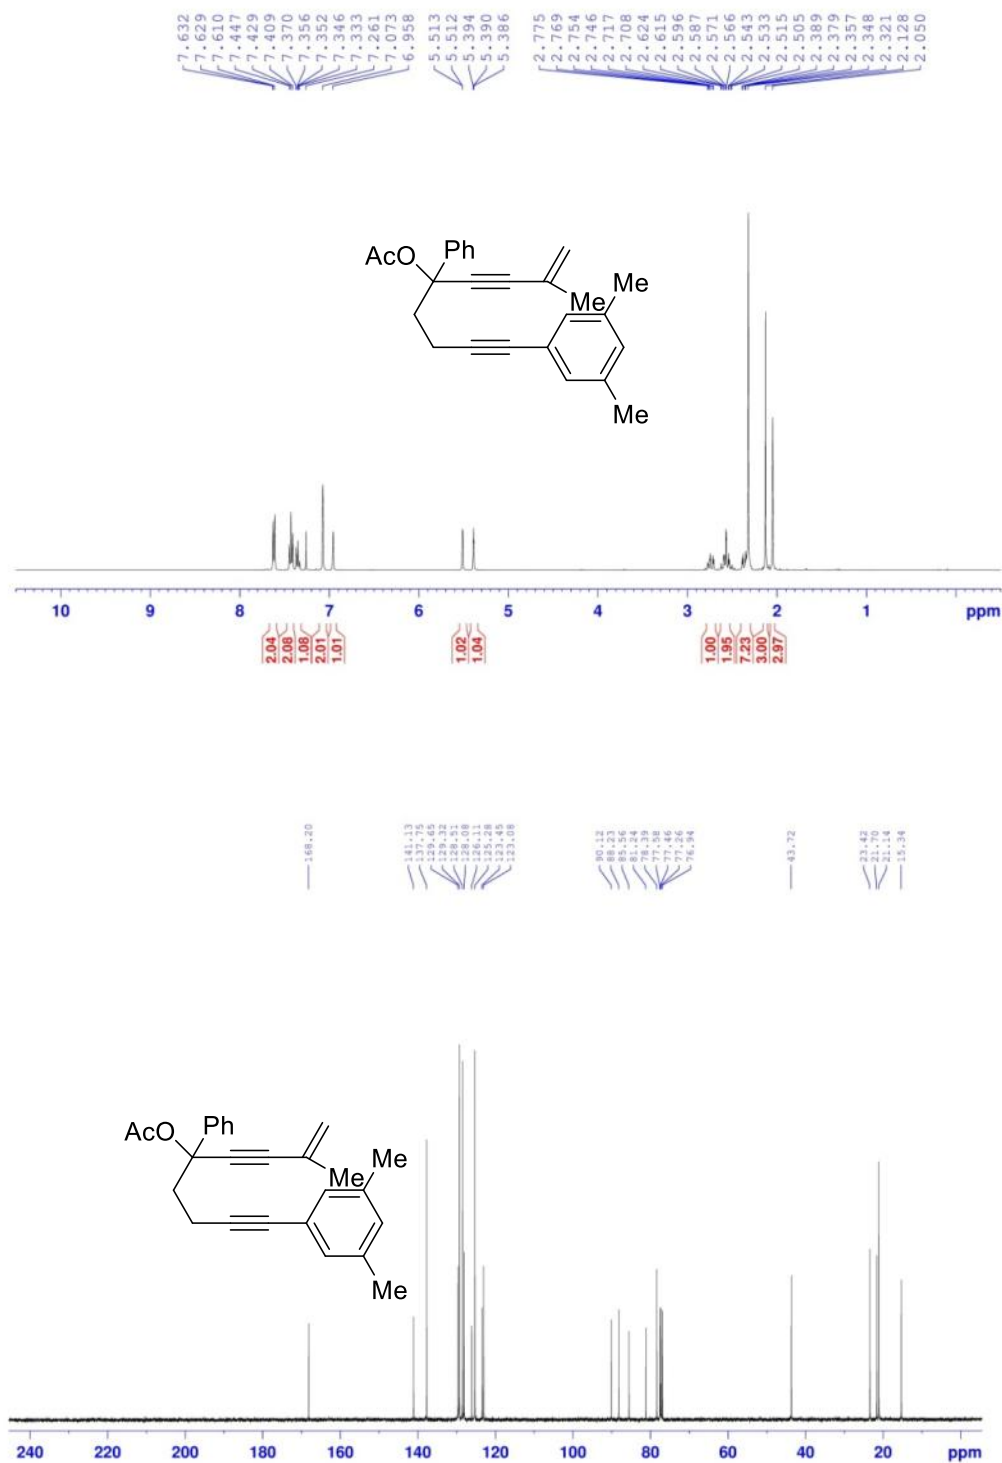

Figure S36.  $^1\text{H}$  and  $^{13}\text{C}\{^1\text{H}\}$  NMR spectra of 2-methyl-5-phenyl-9-(2,4,5-trimethylphenyl)nona-1-en-3,8-diyn-5-yl acetate (1k)

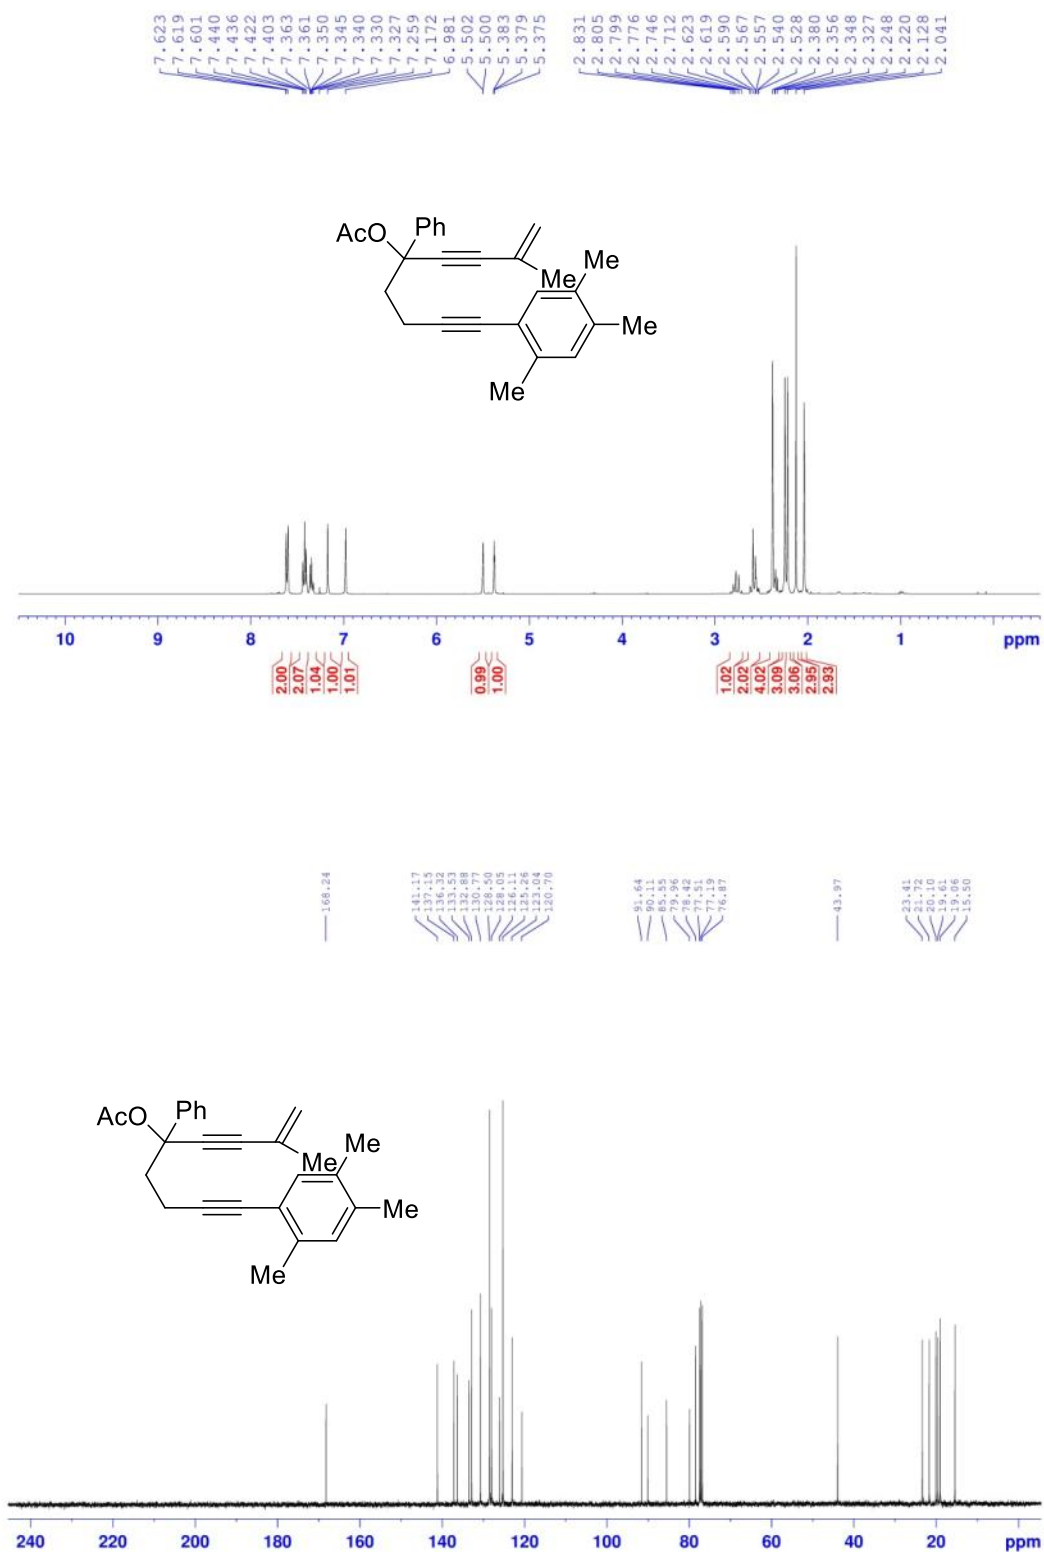

### 1-en-3,8-diyn-5-yl acetate (1λ)

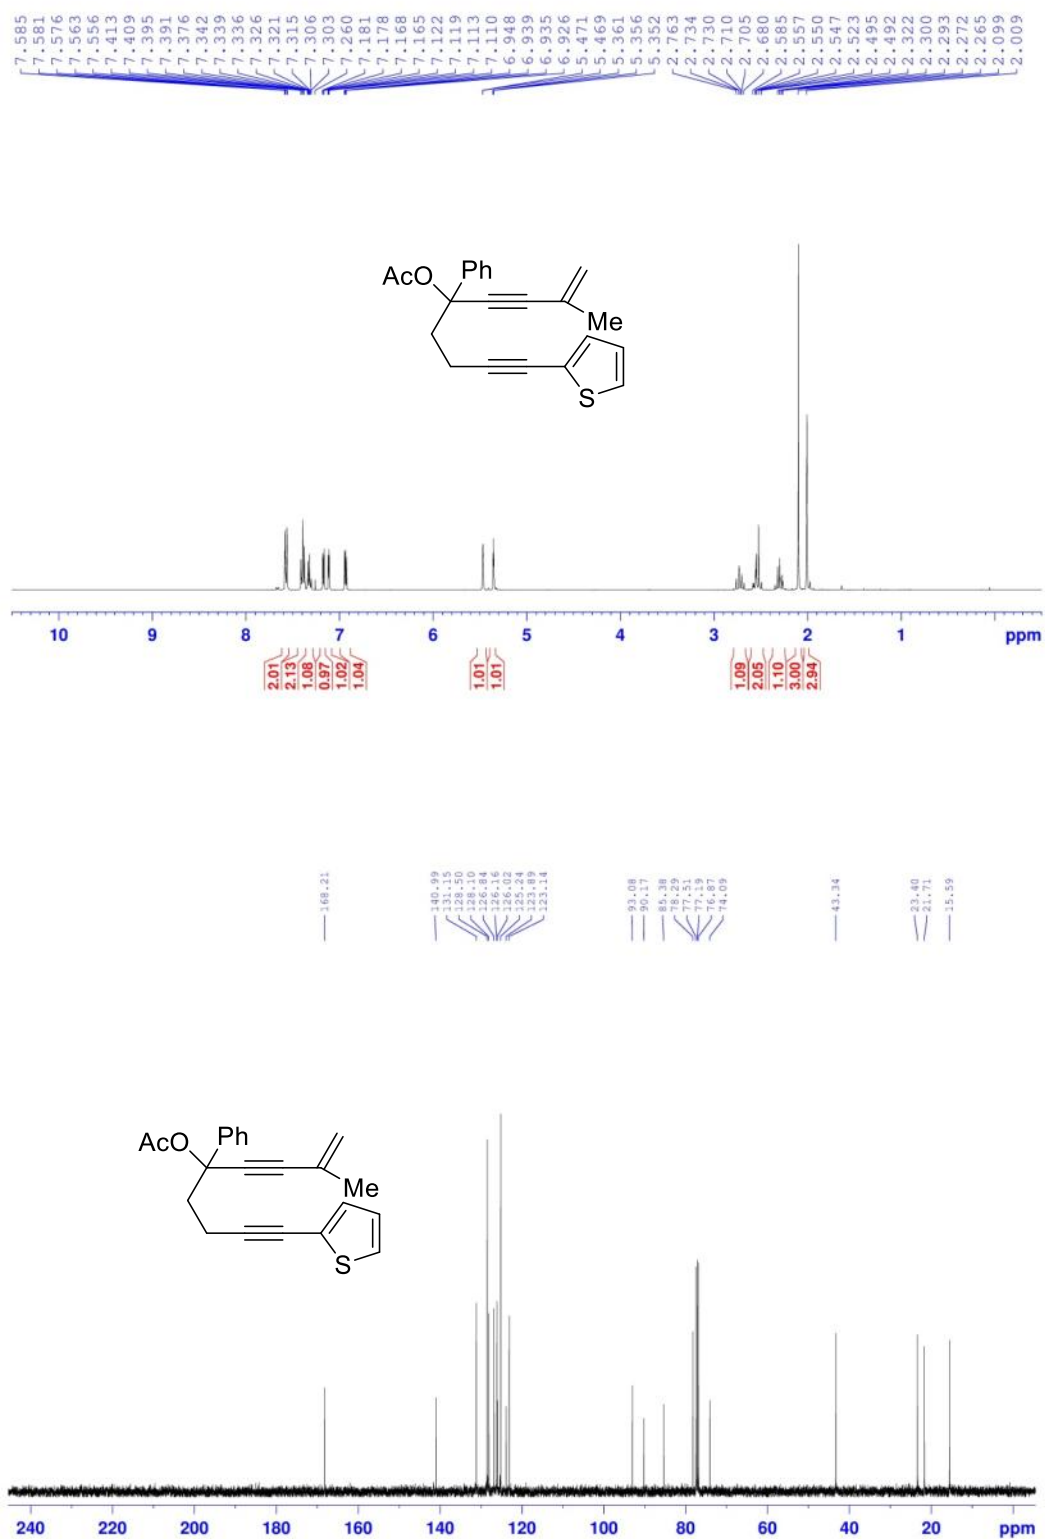

Figure S38.  $^1\text{H}$  and  $^{13}\text{C}\{^1\text{H}\}$  NMR spectra of 3,4-diphenyl-1*H*-cyclopenta[*b*]naphthalene  
(4a)

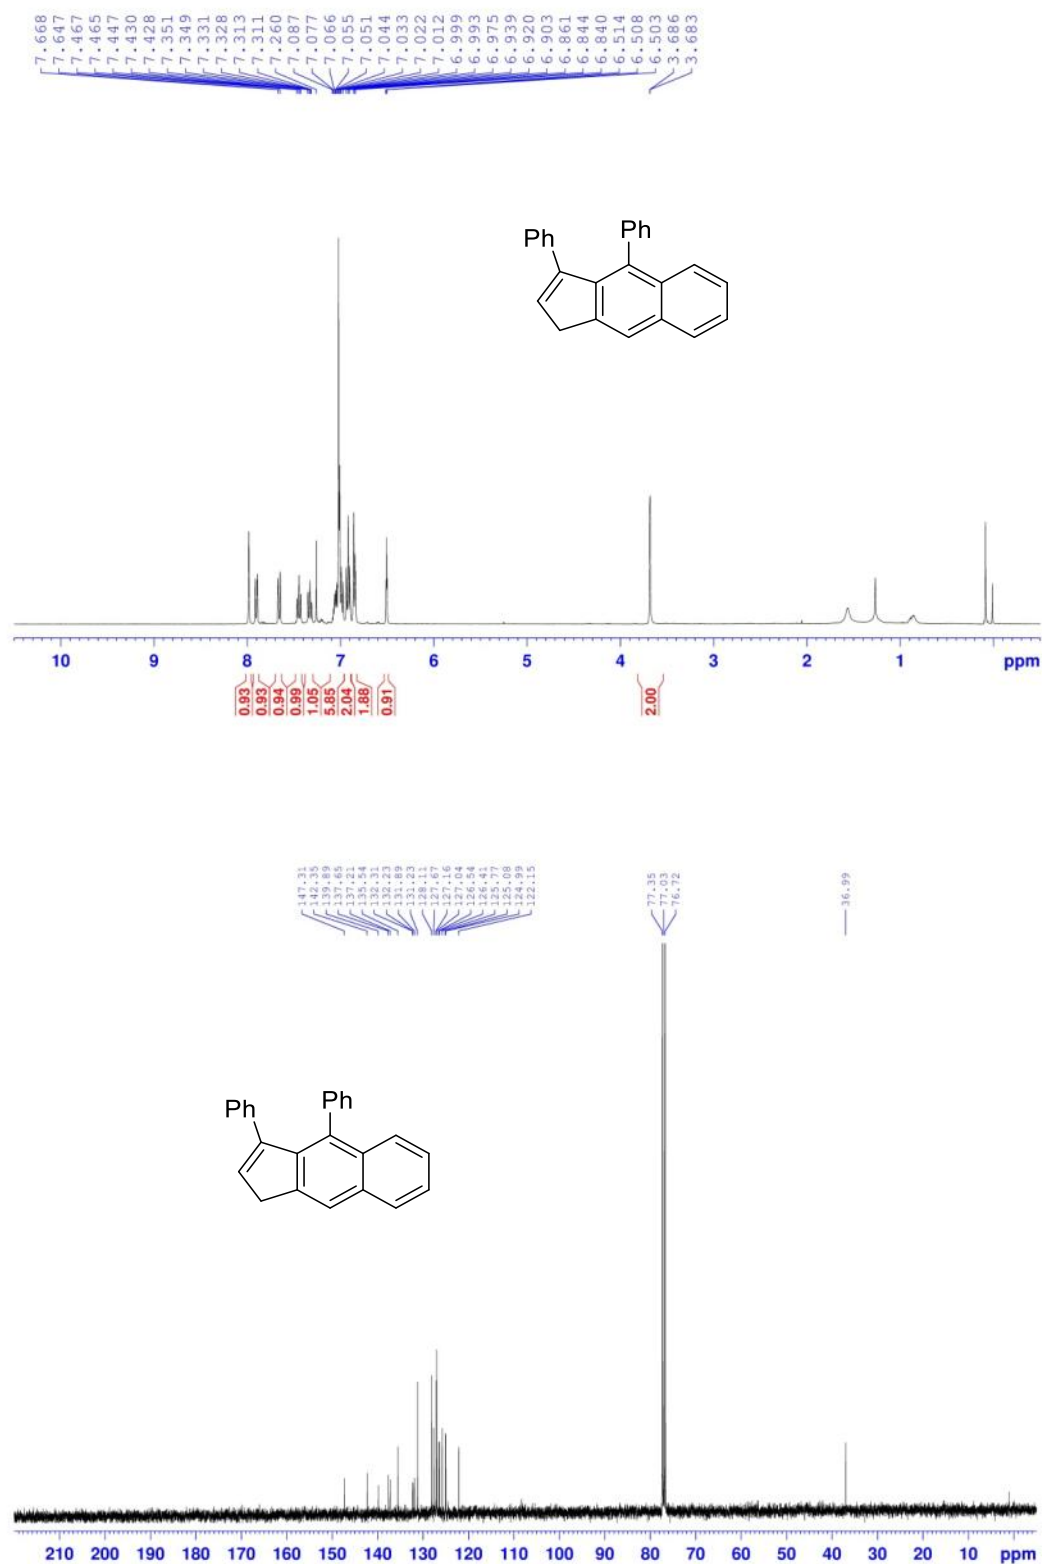



Figure S39.  $^1\text{H}$  and  $^{13}\text{C}\{^1\text{H}\}$  NMR spectra of 3-methyl-4-phenyl-1*H*-cyclopenta[*b*]naphthalene (4e)

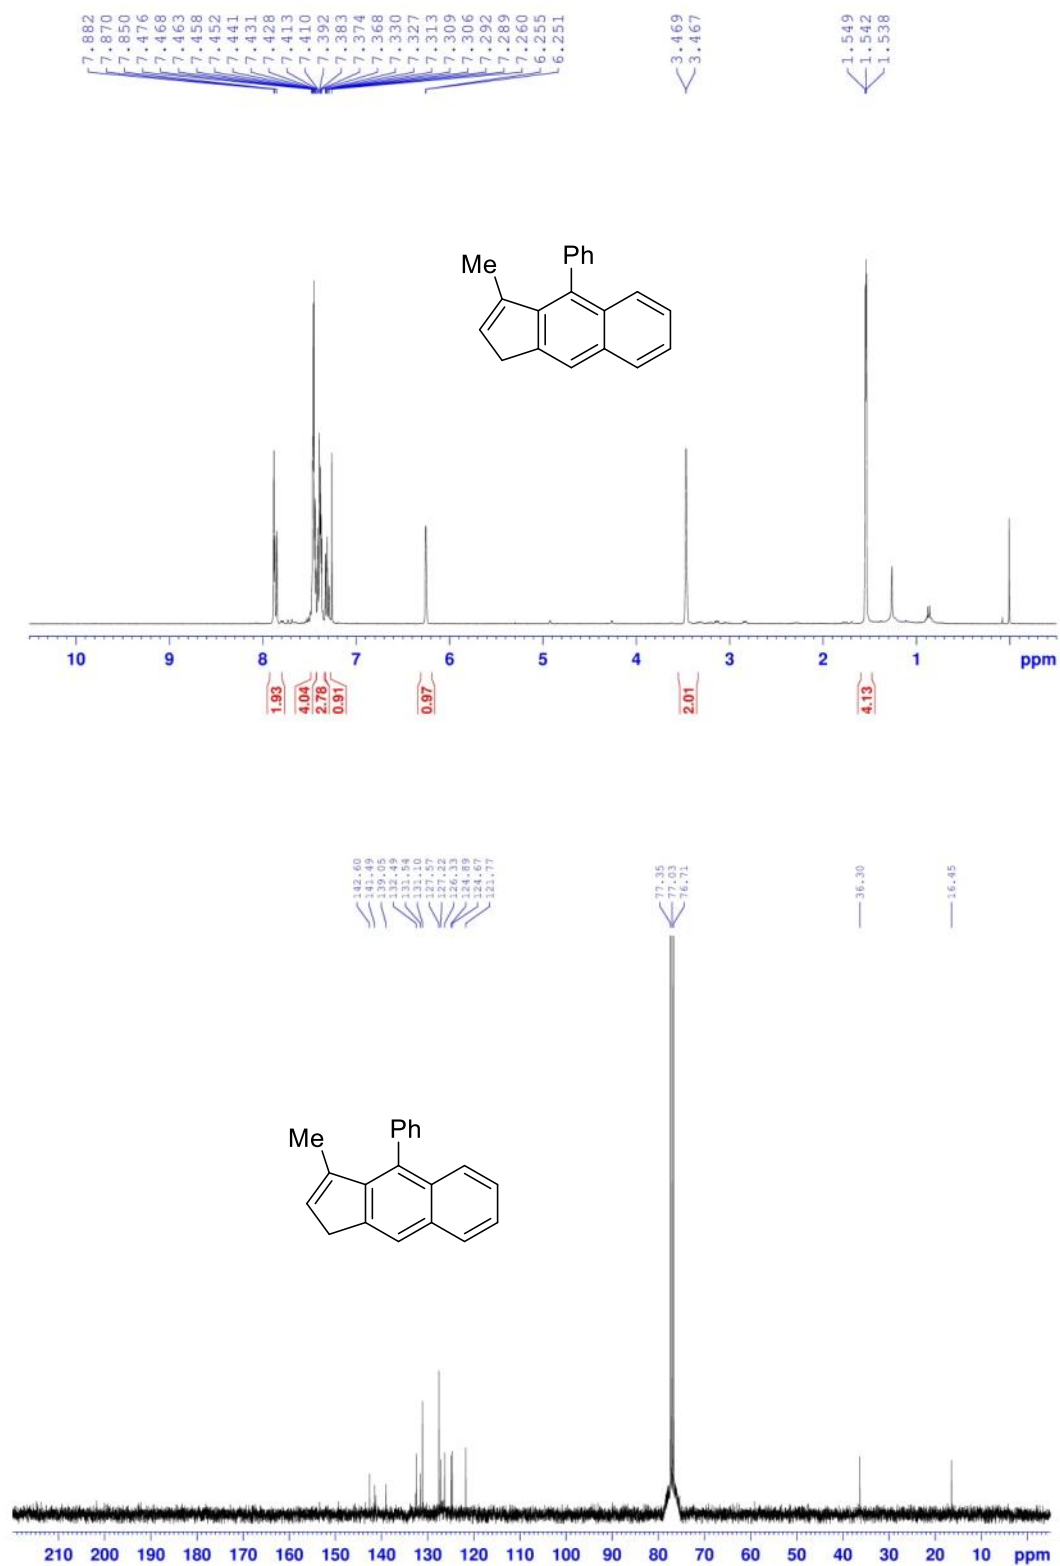

Figure S40.  $^1\text{H}$  and  $^{13}\text{C}\{^1\text{H}\}$  NMR spectra of 3-cyclopropyl-4-phenyl-1*H*-cyclopenta[*b*]naphthalene (4f)

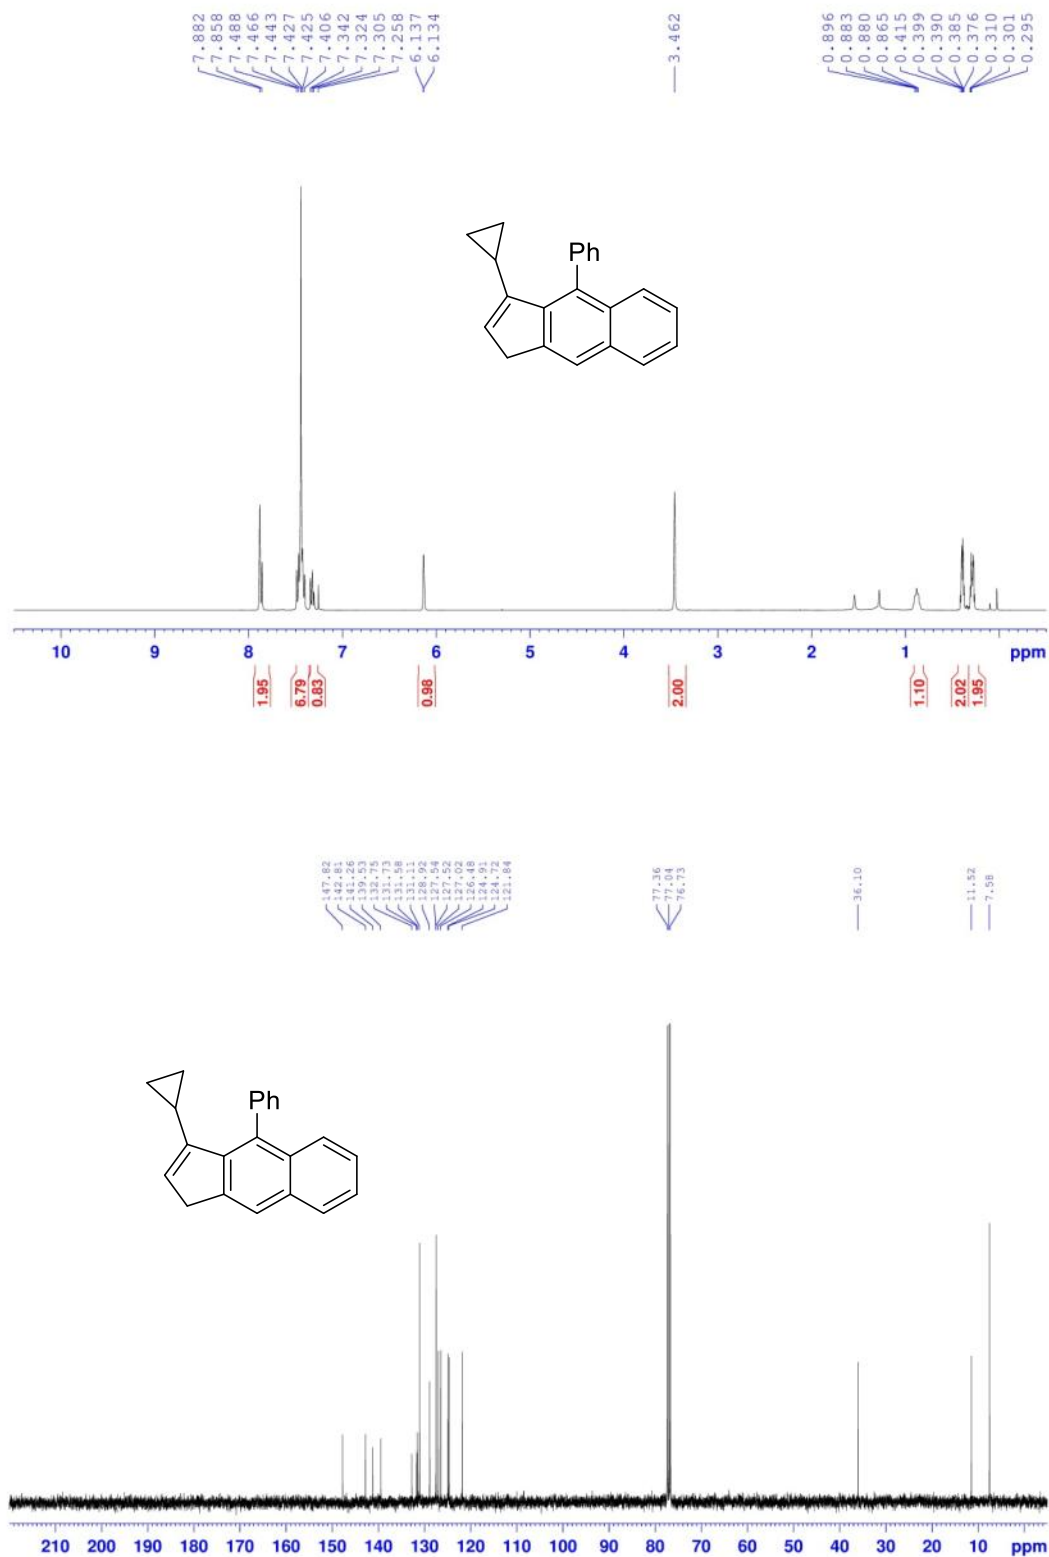

Figure S41.  $^1\text{H}$  and  $^{13}\text{C}\{^1\text{H}\}$  NMR spectra of 3-(4-chlorophenyl)-4-phenyl-1*H*-cyclopenta[*b*]naphthalene(4g)

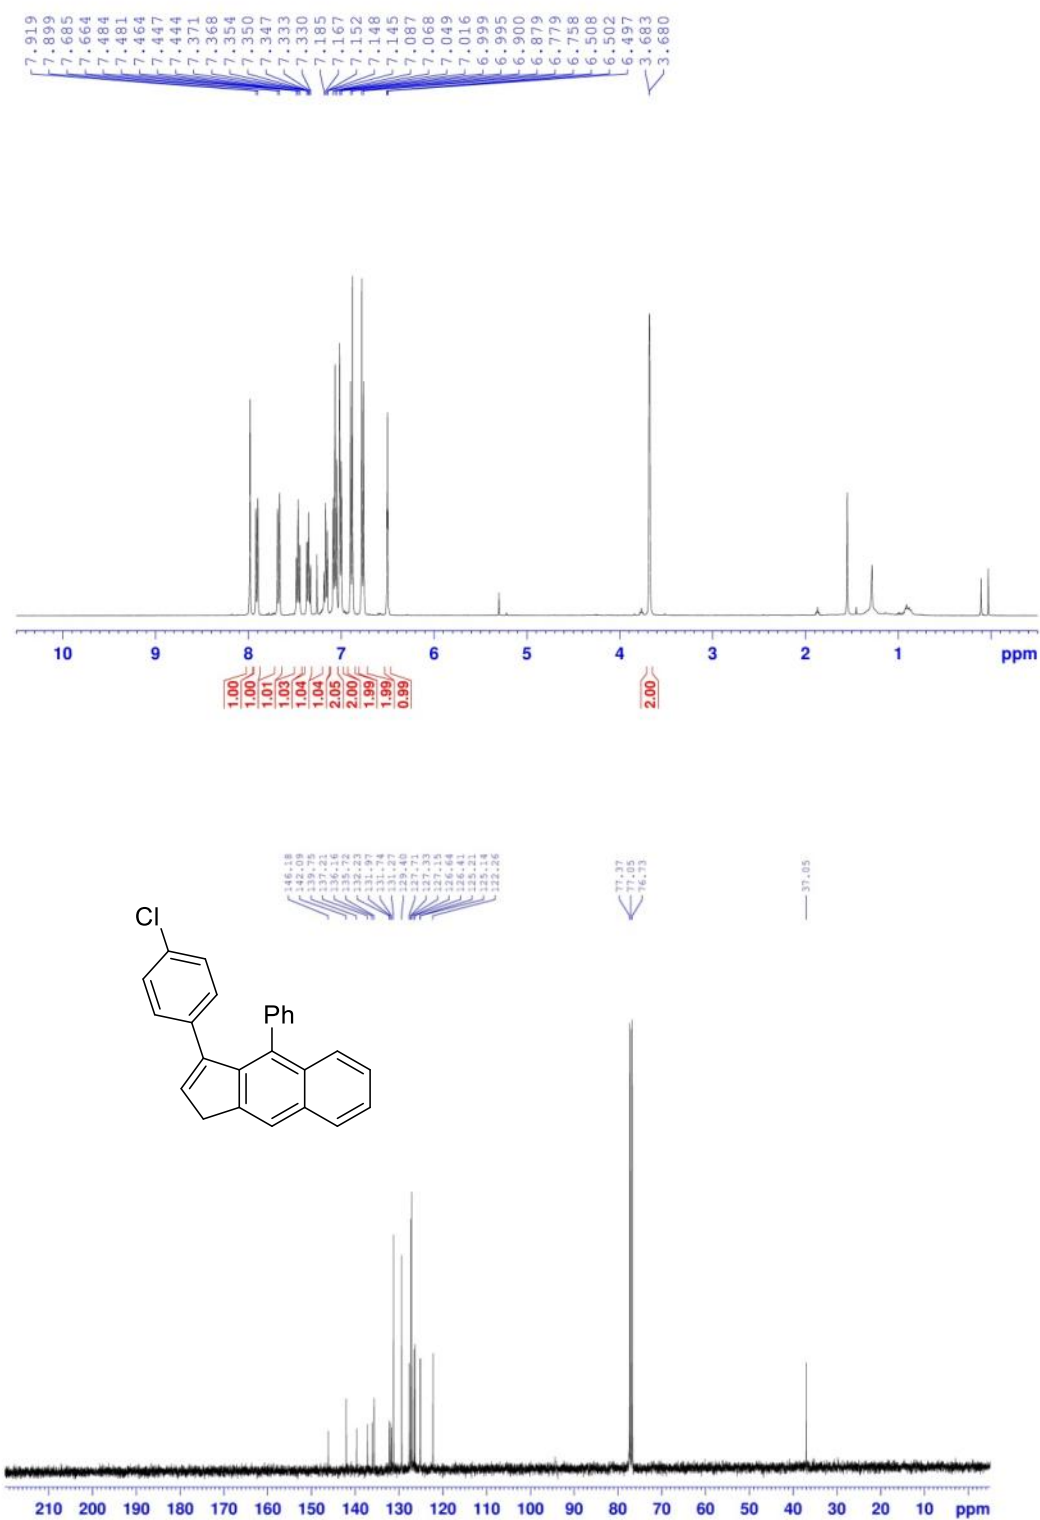

Figure S42.  $^1\text{H}$  and  $^{13}\text{C}\{^1\text{H}\}$  NMR spectra of 4-(4-fluorophenyl)-3-phenyl-1*H*-cyclopenta[*b*]naphthalene(4h)

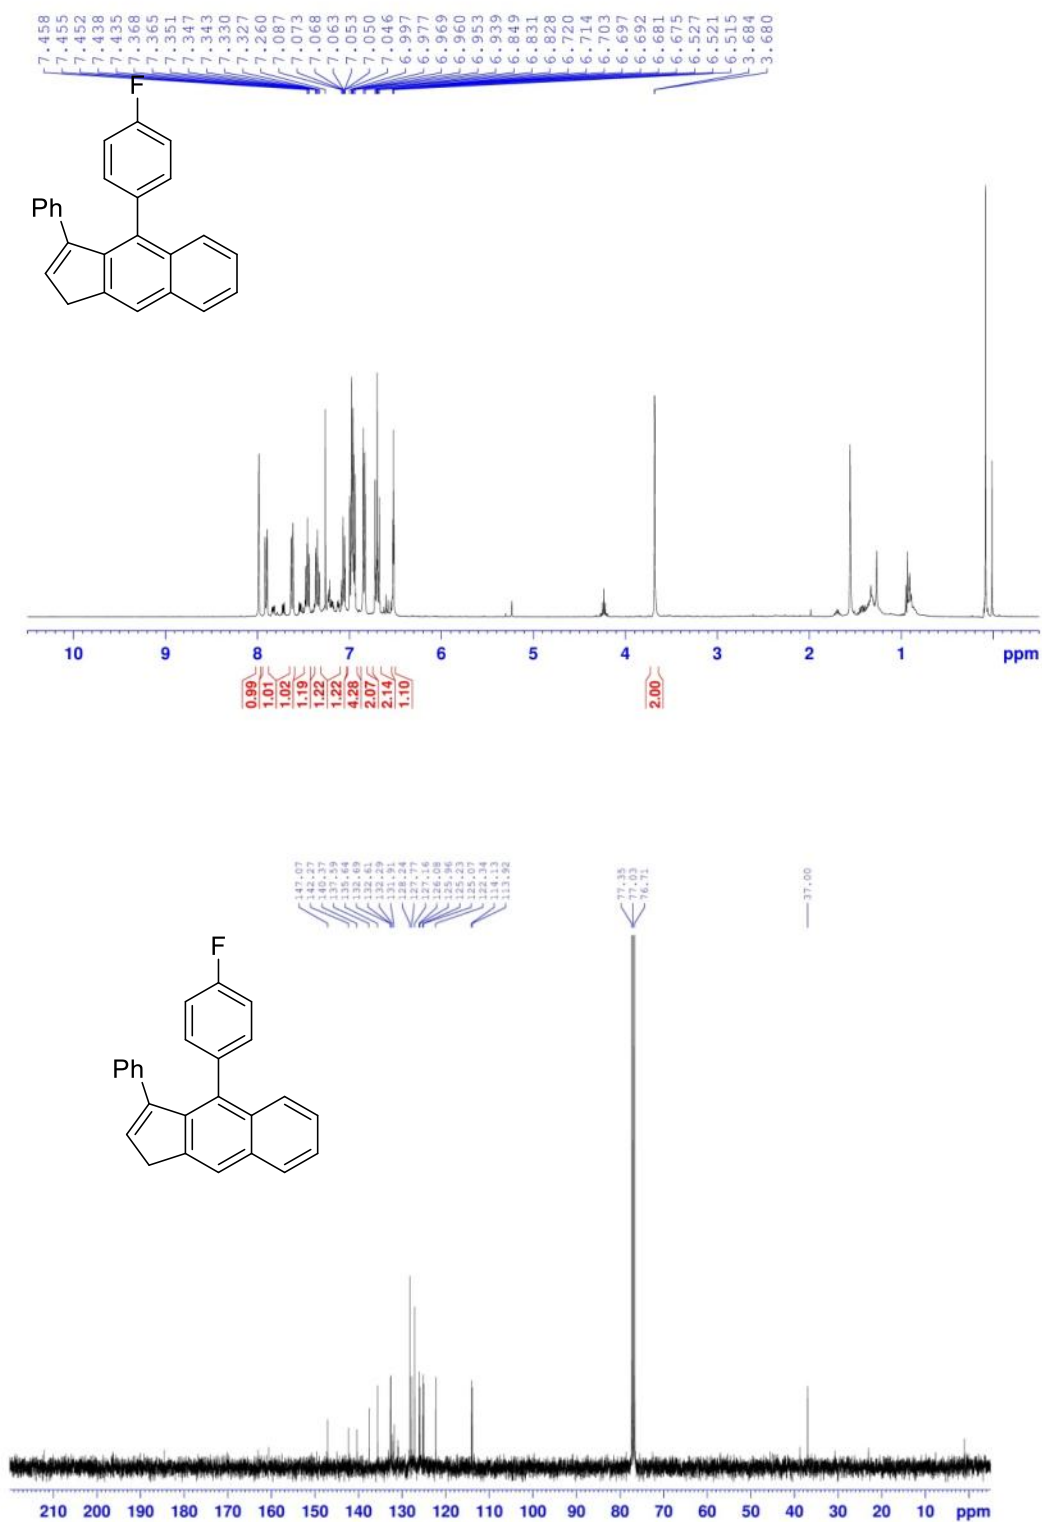

Figure S43.  $^1\text{H}$  and  $^{13}\text{C}\{^1\text{H}\}$  NMR spectra of 3-phenyl-4-(p-tolyl)-1*H*-cyclopenta[*b*]naphthalene (4i)

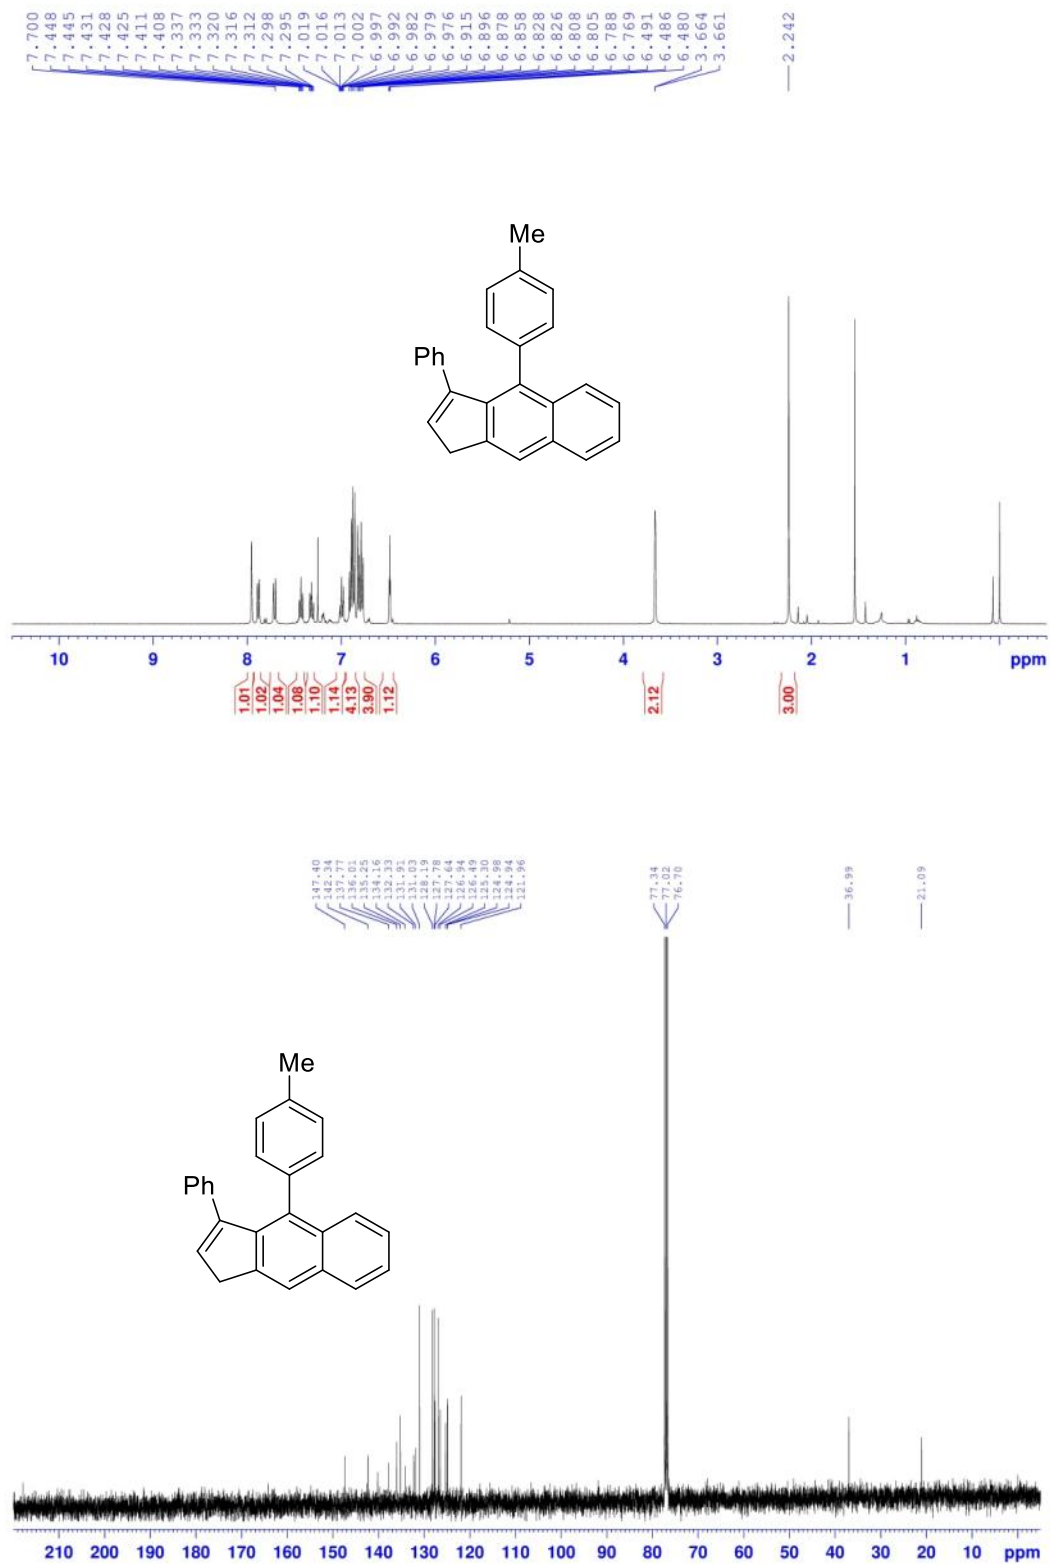

**Figure S44.  $^1\text{H}$  and  $^{13}\text{C}\{^1\text{H}\}$  NMR spectra of 3-(3-phenyl-1*H*-cyclopenta[*b*]naphthalen-4-yl)thiophene (4j)**

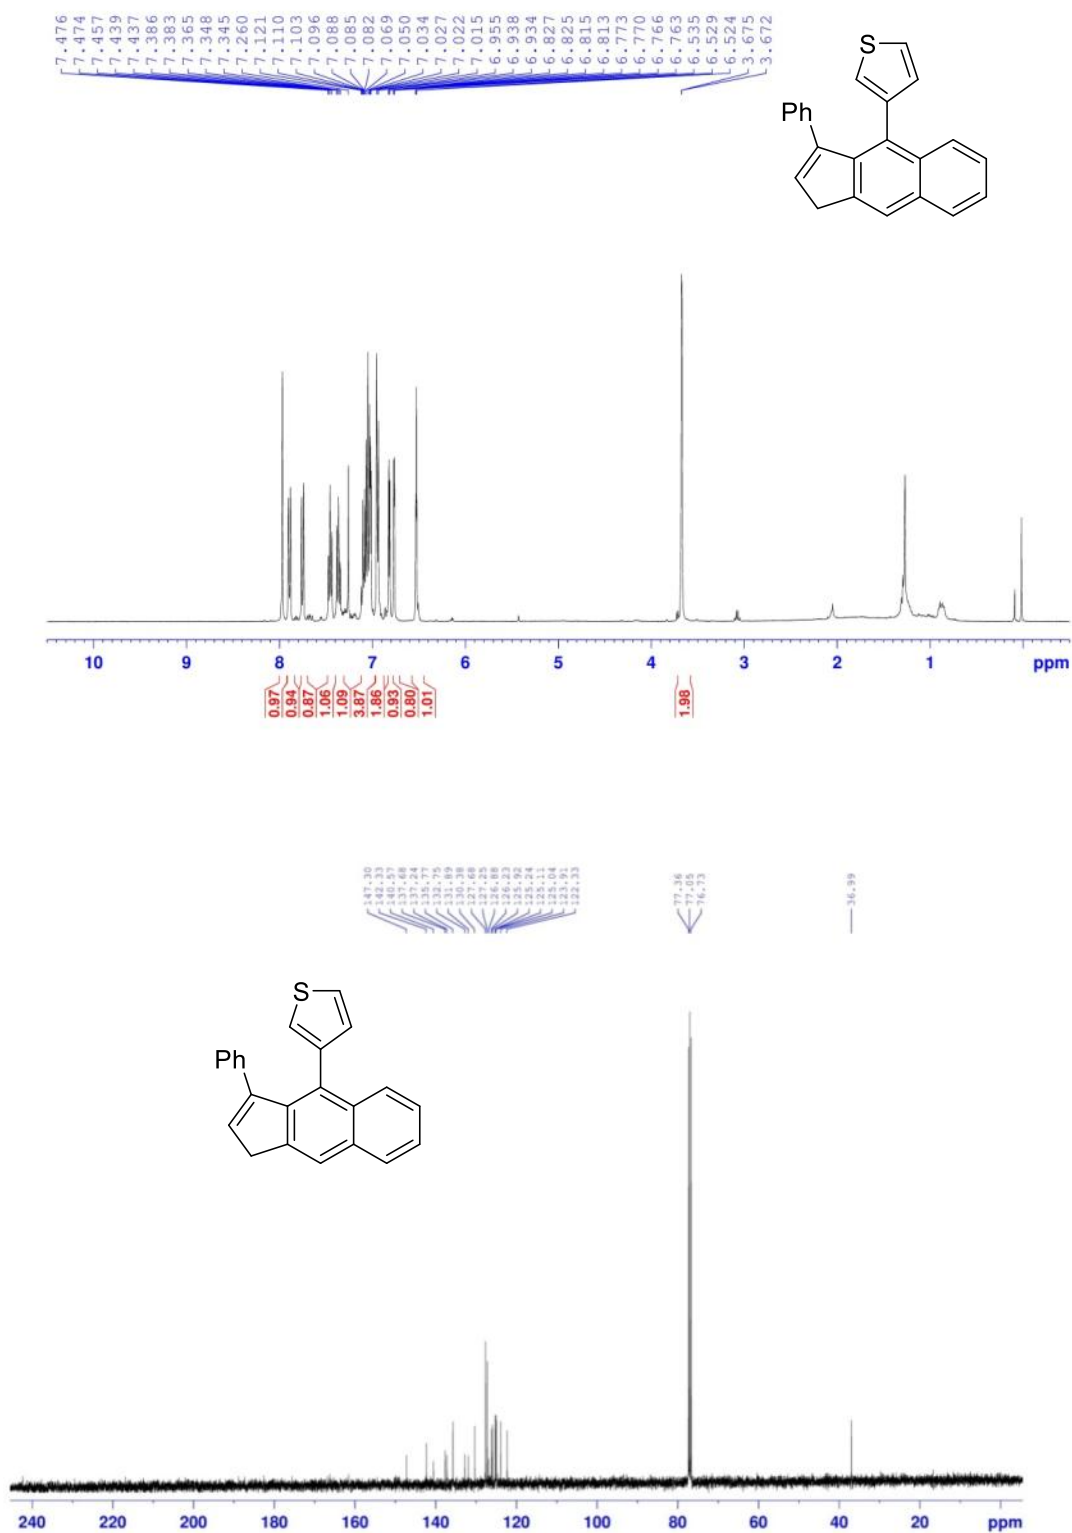

Figure S45.  $^1\text{H}$  and  $^{13}\text{C}\{^1\text{H}\}$  NMR spectra of 6-fluoro-3,4-diphenyl-1*H*-cyclopenta[*b*]naphthalene (4k)

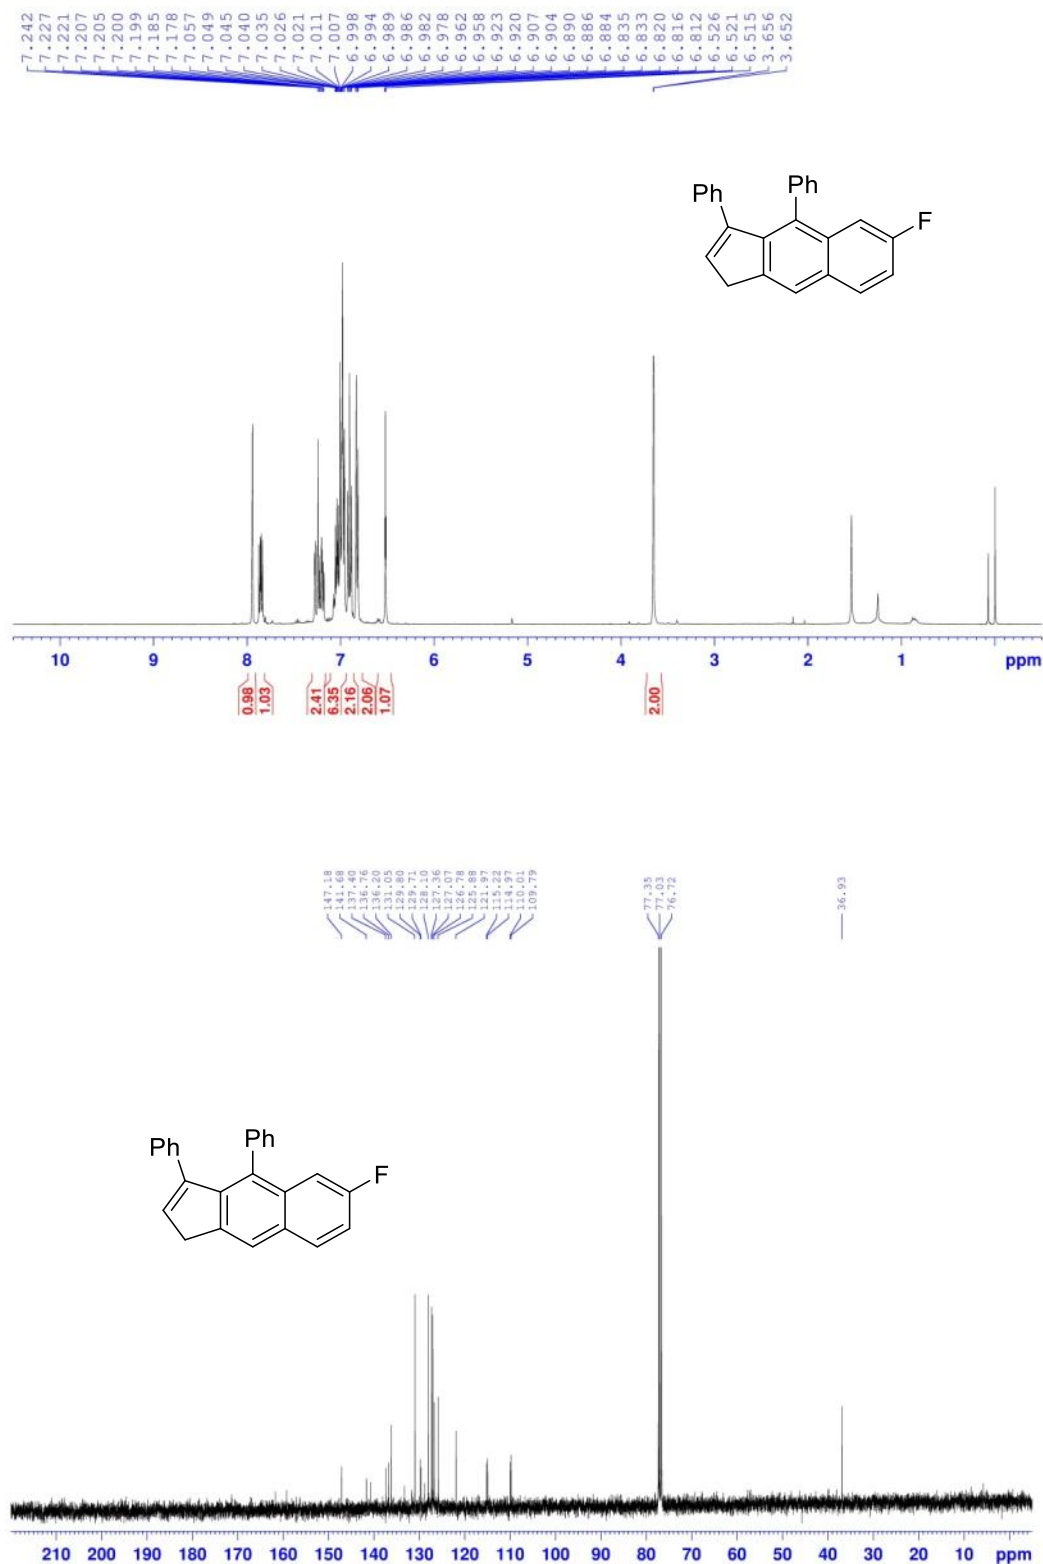

**Figure S46.**  $^1\text{H}$  and  $^{13}\text{C}\{^1\text{H}\}$  NMR spectra of 6-bromo-3,4-diphenyl-1*H*-cyclopenta[*b*]naphthalene (4l)

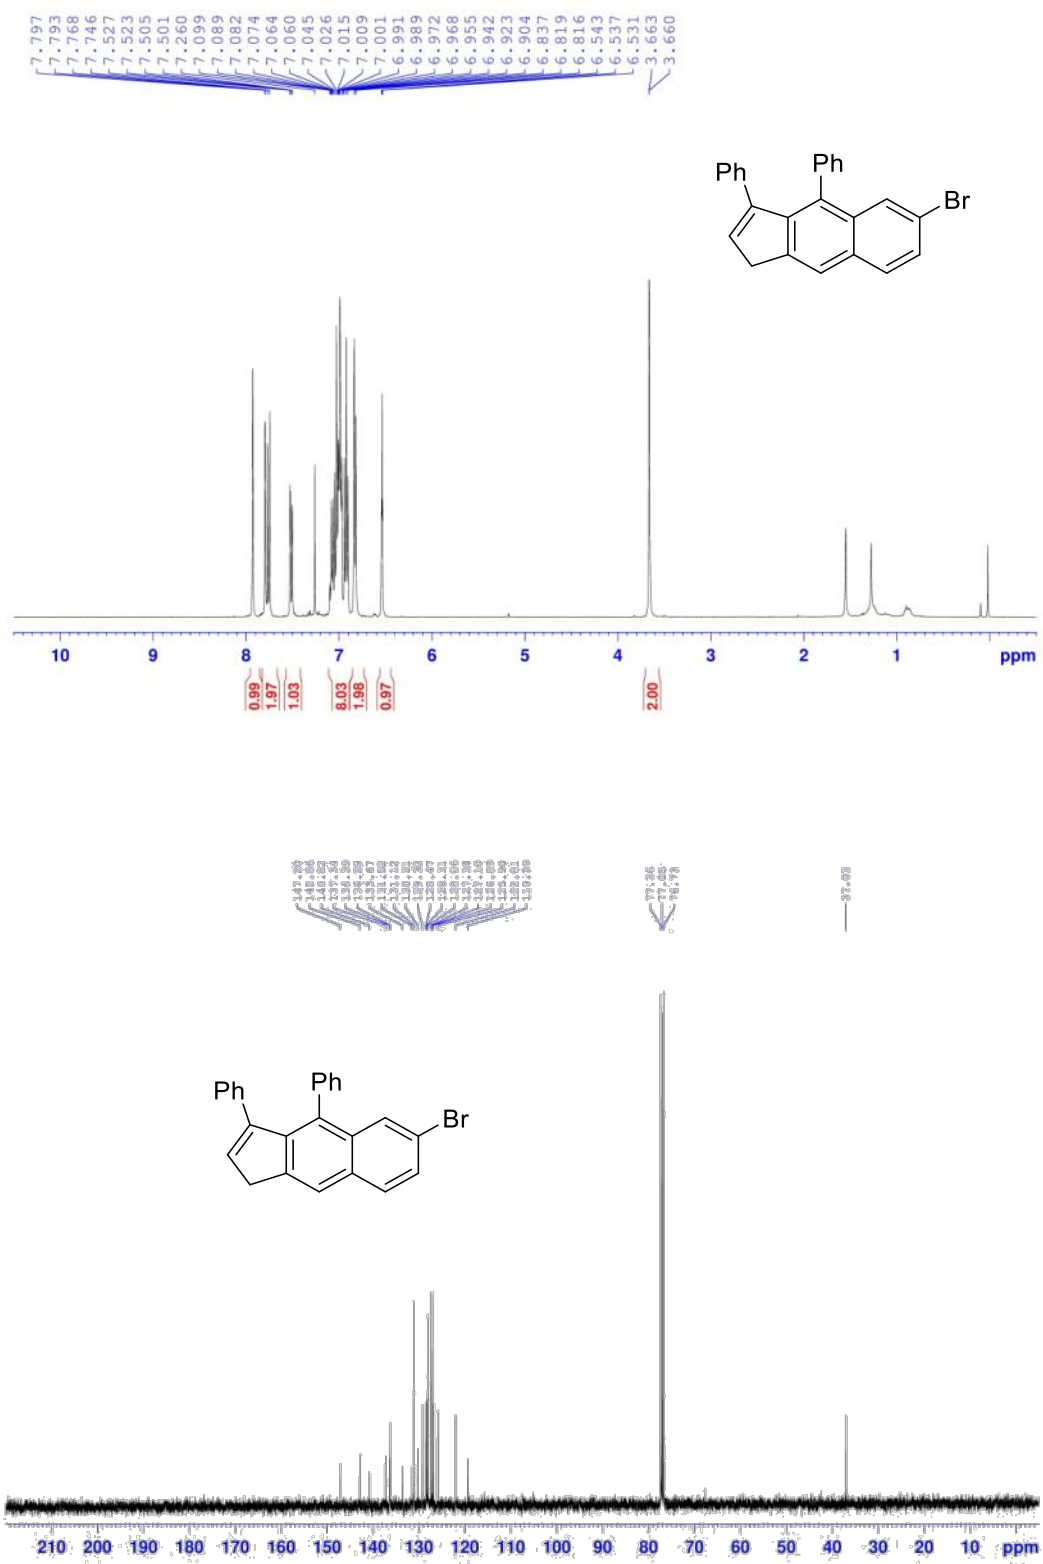



Figure S47.  $^1\text{H}$  and  $^{13}\text{C}\{^1\text{H}\}$  NMR spectra of 6-pentyl-3,4-diphenyl-1*H*-cyclopenta[*b*]naphthalene (4m)

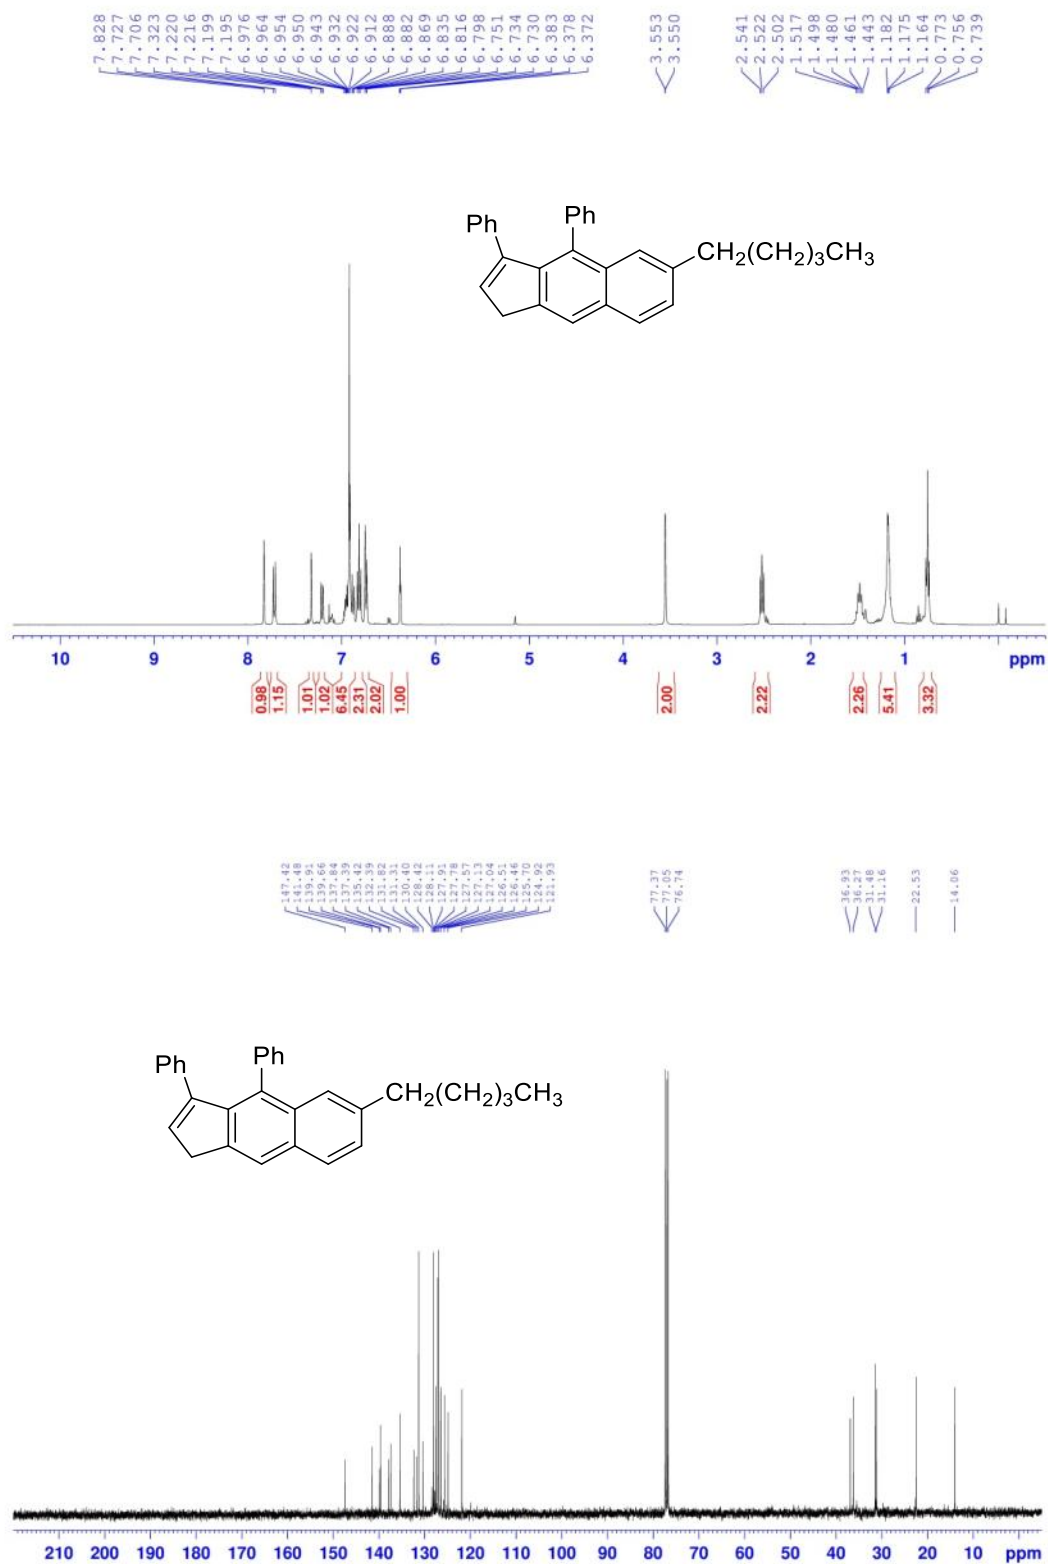

Figure S48.  $^1\text{H}$  and  $^{13}\text{C}\{^1\text{H}\}$  NMR spectra of 6-methyl-3,4-diphenyl-1*H*-cyclopenta[*b*]naphthalene (4n)

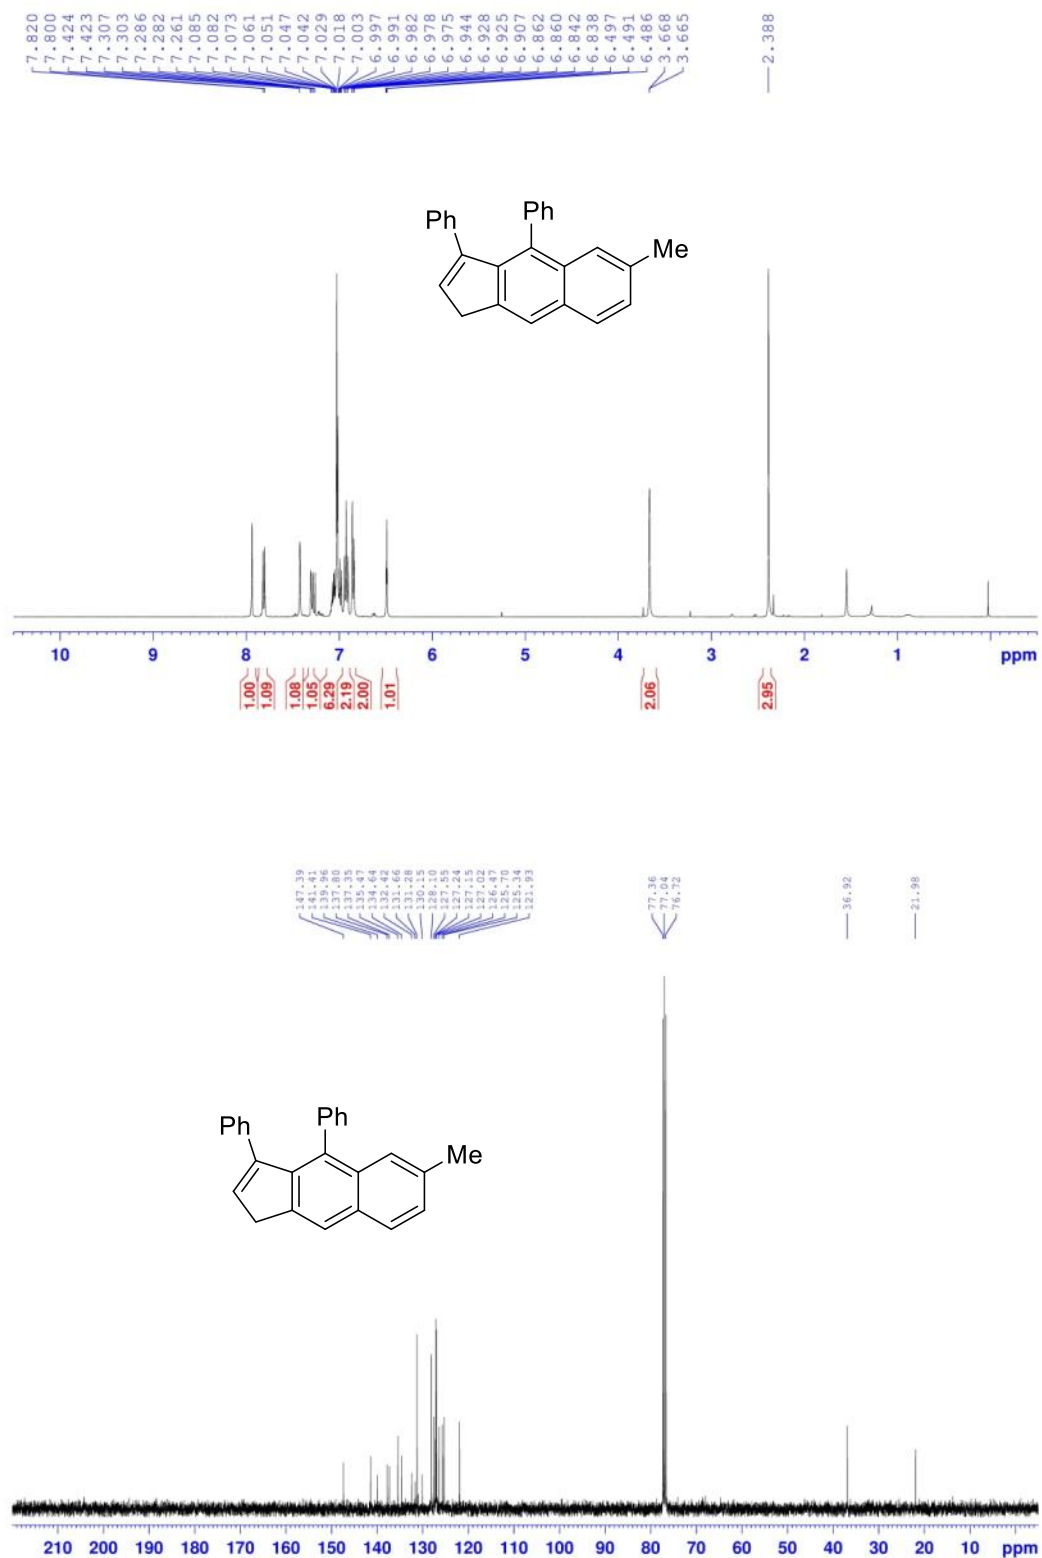

Figure S49.  $^1\text{H}$  and  $^{13}\text{C}\{^1\text{H}\}$  NMR spectra of 8-methyl-3,4-diphenyl-1*H*-cyclopenta[*b*]naphthalene (4o)

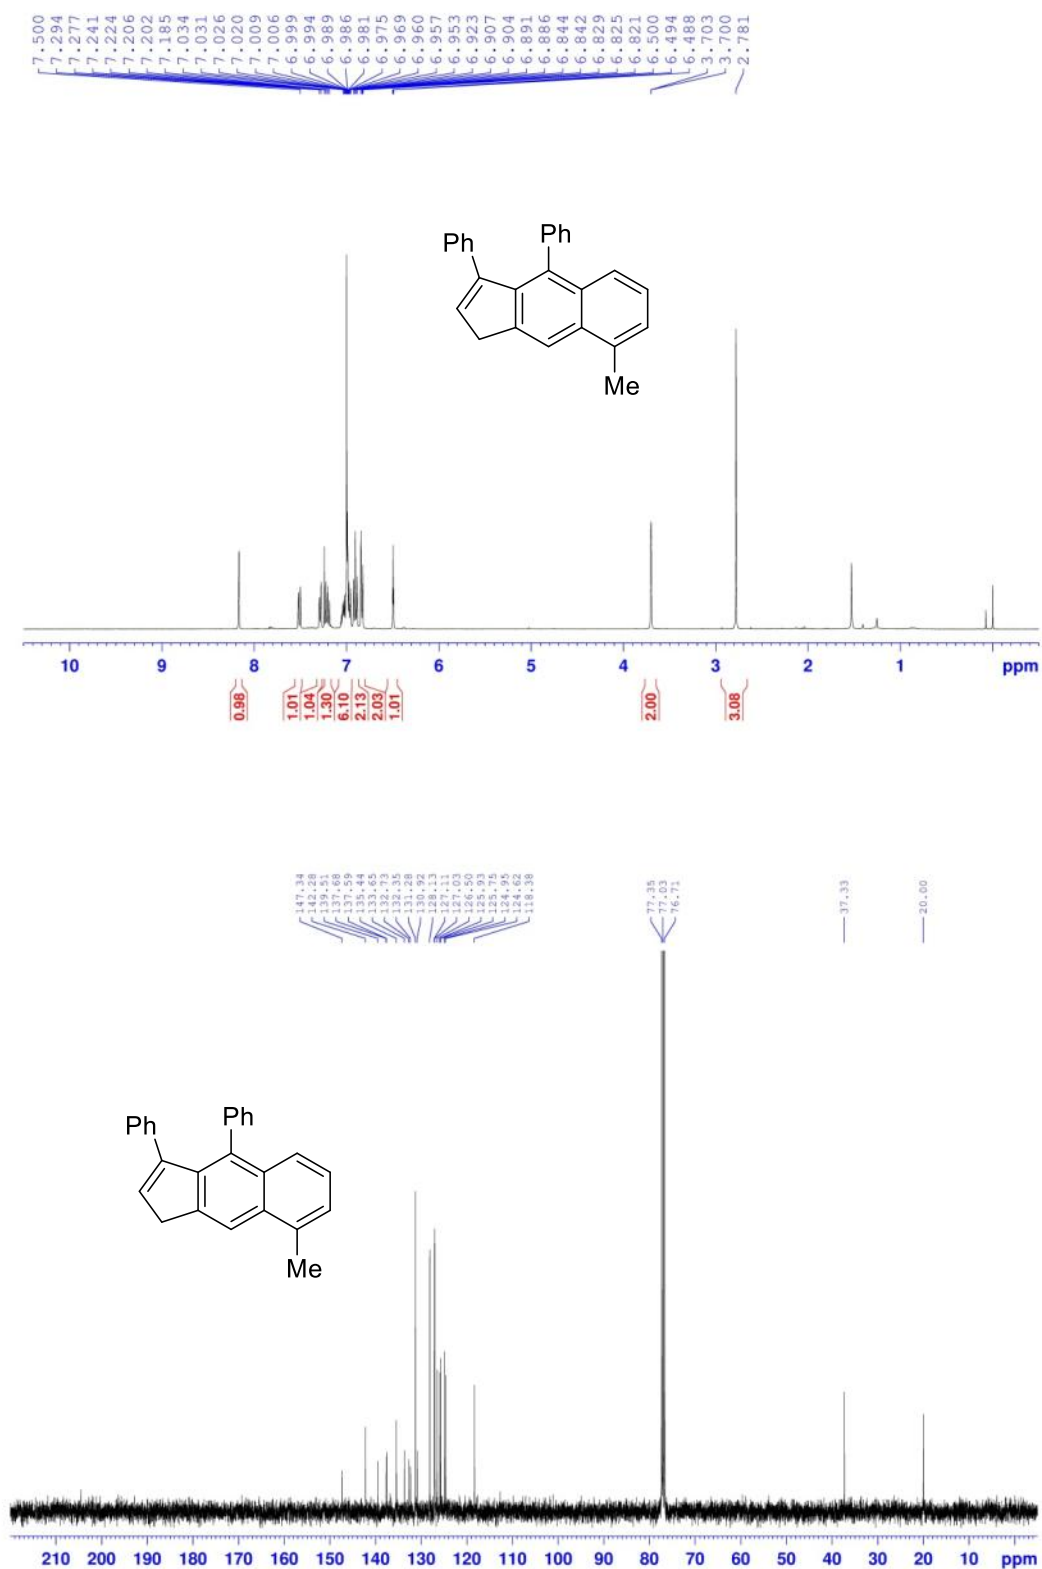

Figure S50.  $^1\text{H}$  and  $^{13}\text{C}\{^1\text{H}\}$  NMR spectra of 5,7-dimethyl-3,4-diphenyl-1*H*-cyclopenta[*b*]naphthalene (4p)

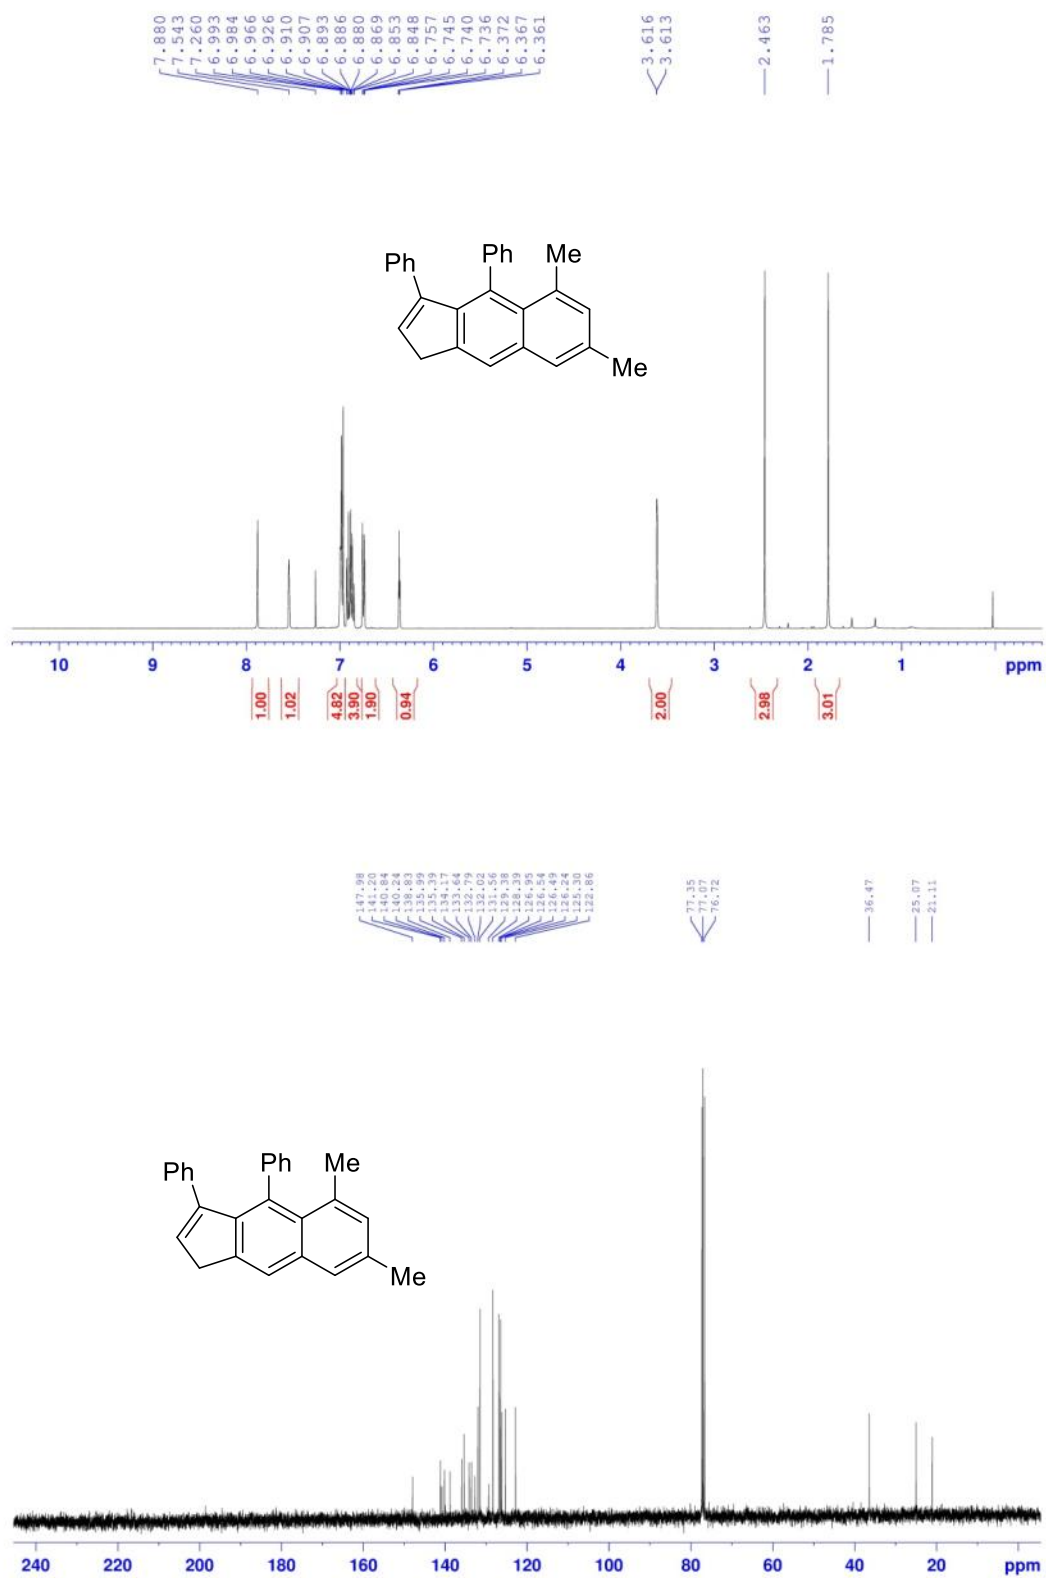

Figure S51.  $^1\text{H}$  and  $^{13}\text{C}\{^1\text{H}\}$  NMR spectra of 5,6,8-trimethyl-3,4-diphenyl-1*H*-cyclopenta[*b*]naphthalene (4q)

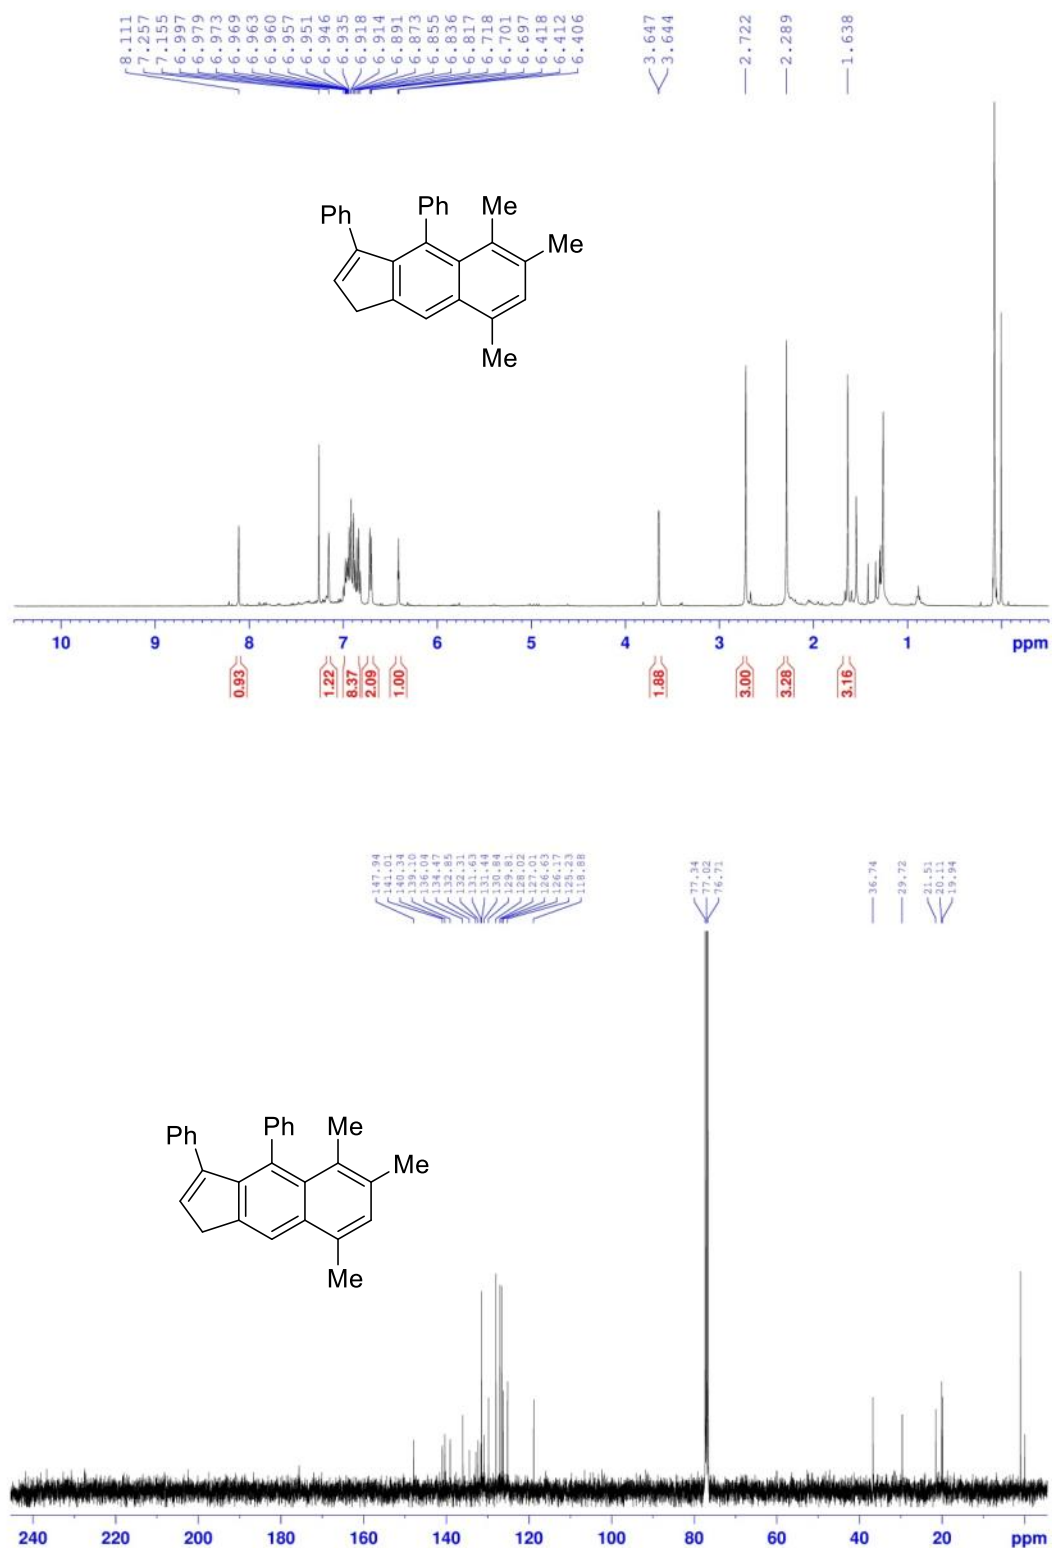

Figure S52.  $^1\text{H}$  and  $^{13}\text{C}\{^1\text{H}\}$  NMR spectra of 7,8-diphenyl-10*H*-cyclopenta[*b*]phenanthrene (4r)

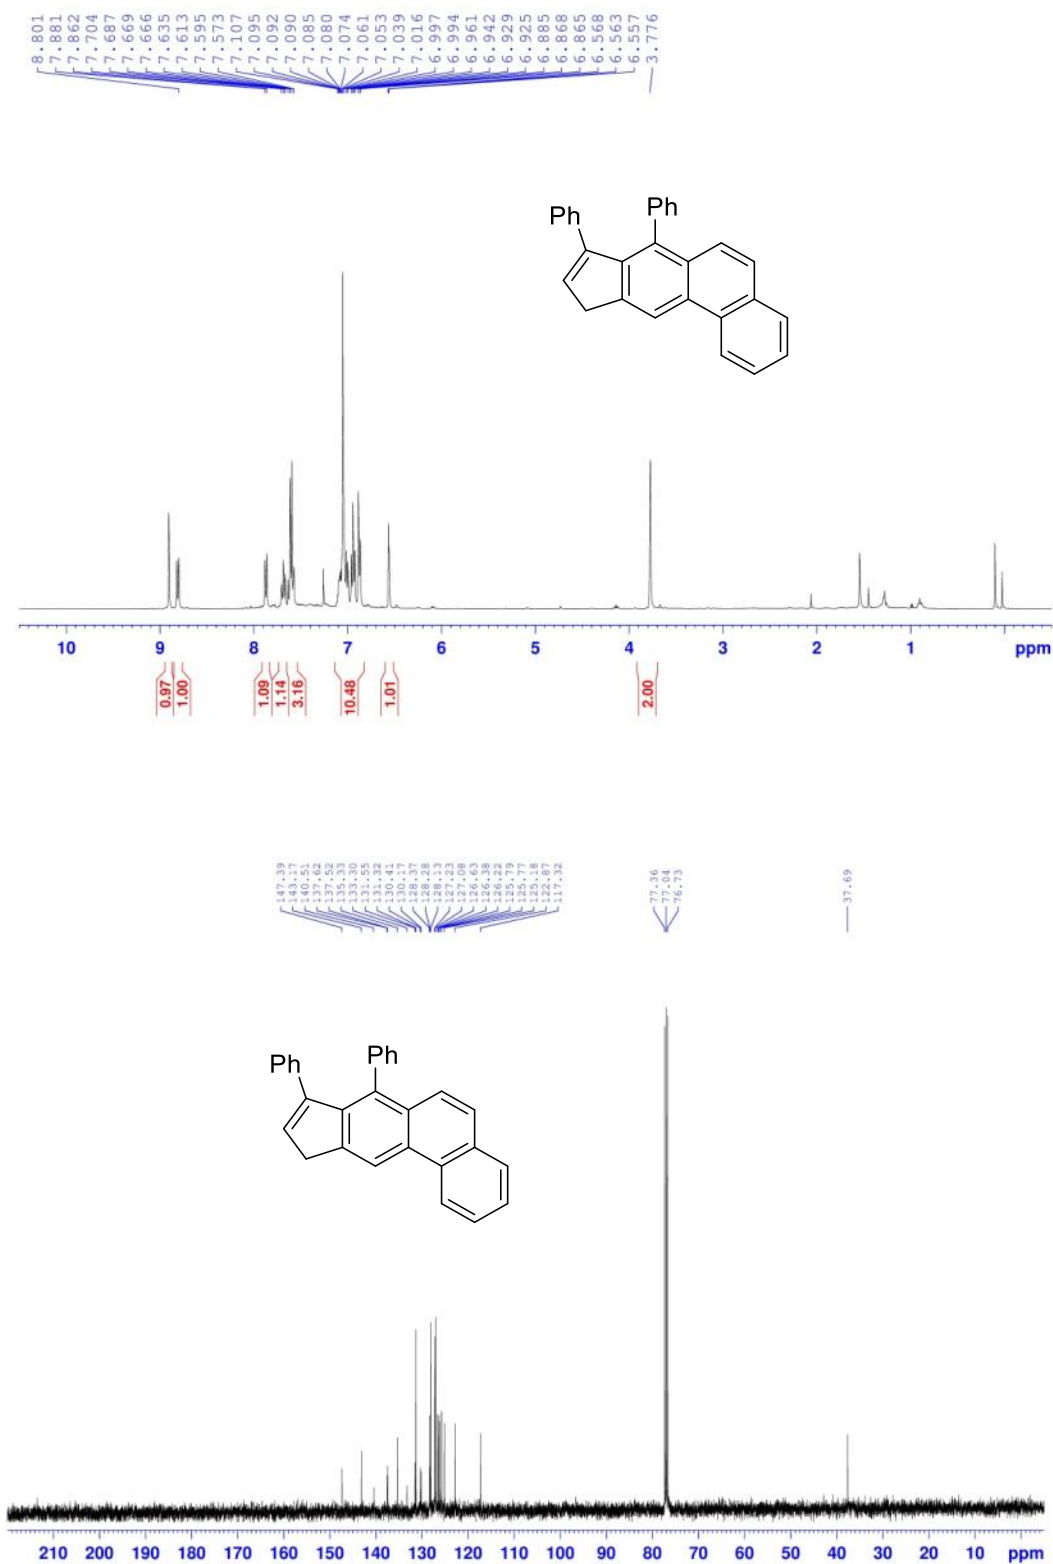

Figure S53.  $^1\text{H}$  and  $^{13}\text{C}\{^1\text{H}\}$  NMR spectra of 7,8-diphenyl-5*H*-indeno[5,6-*b*]thiophene (4s)

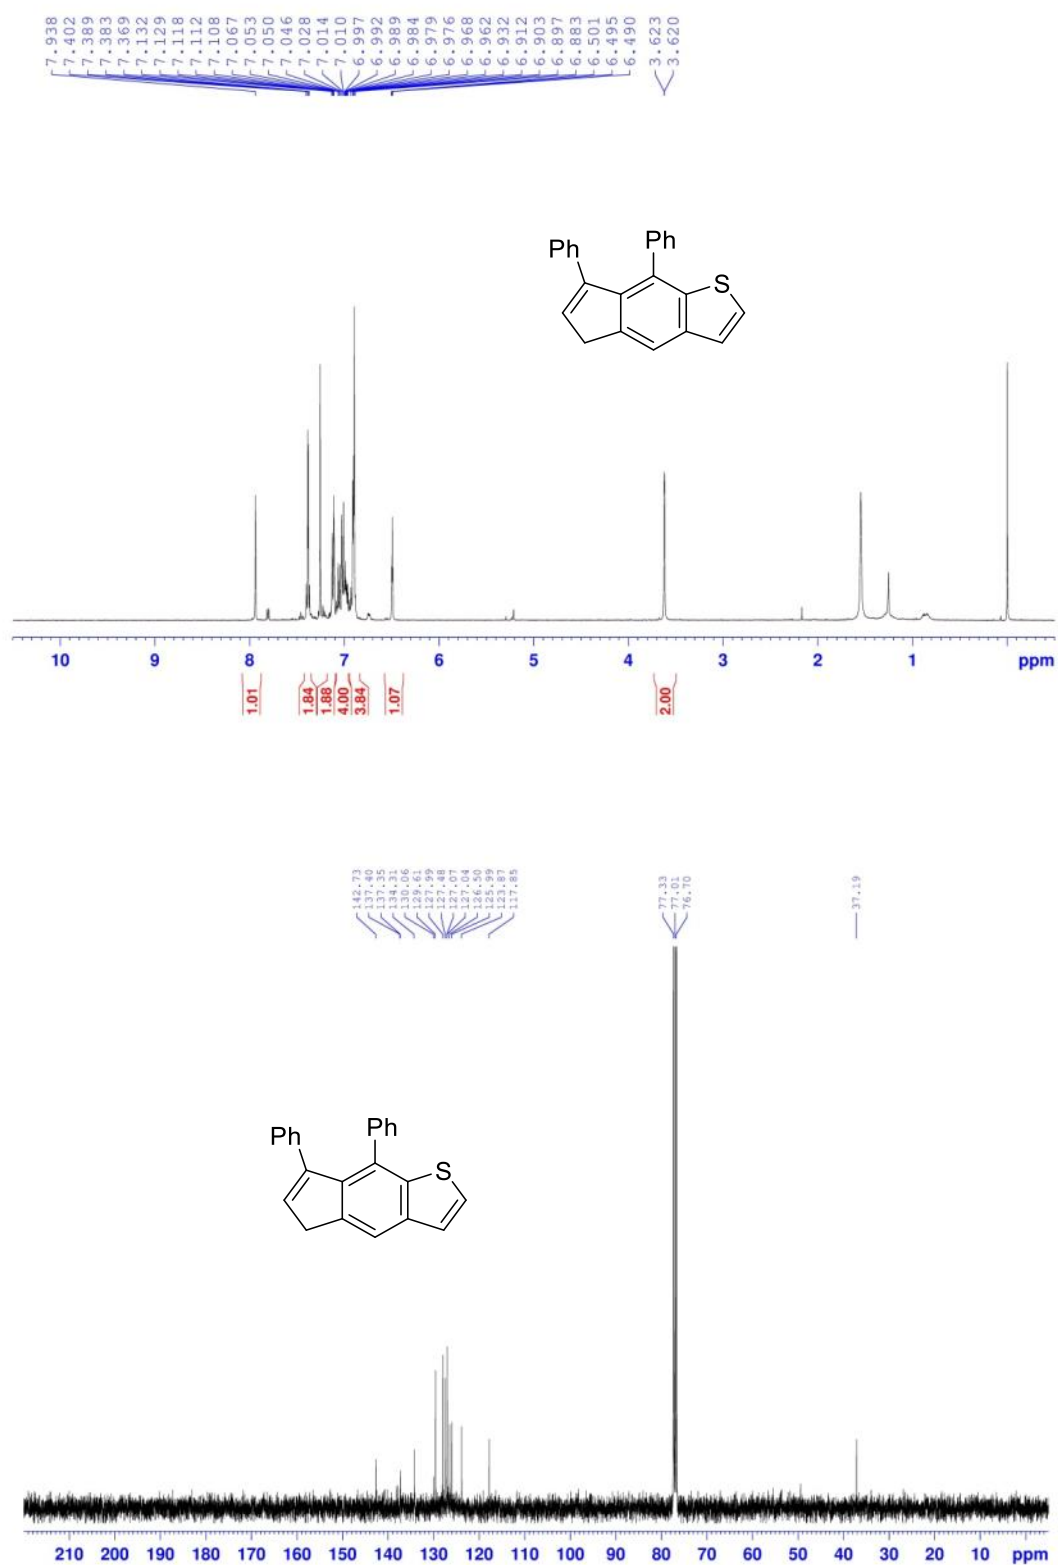

Figure S54.  $^1\text{H}$  and  $^{13}\text{C}\{^1\text{H}\}$  NMR spectra of 4,5-diphenyl-7*H*-indeno[5,6-*b*]thiophene (4t)

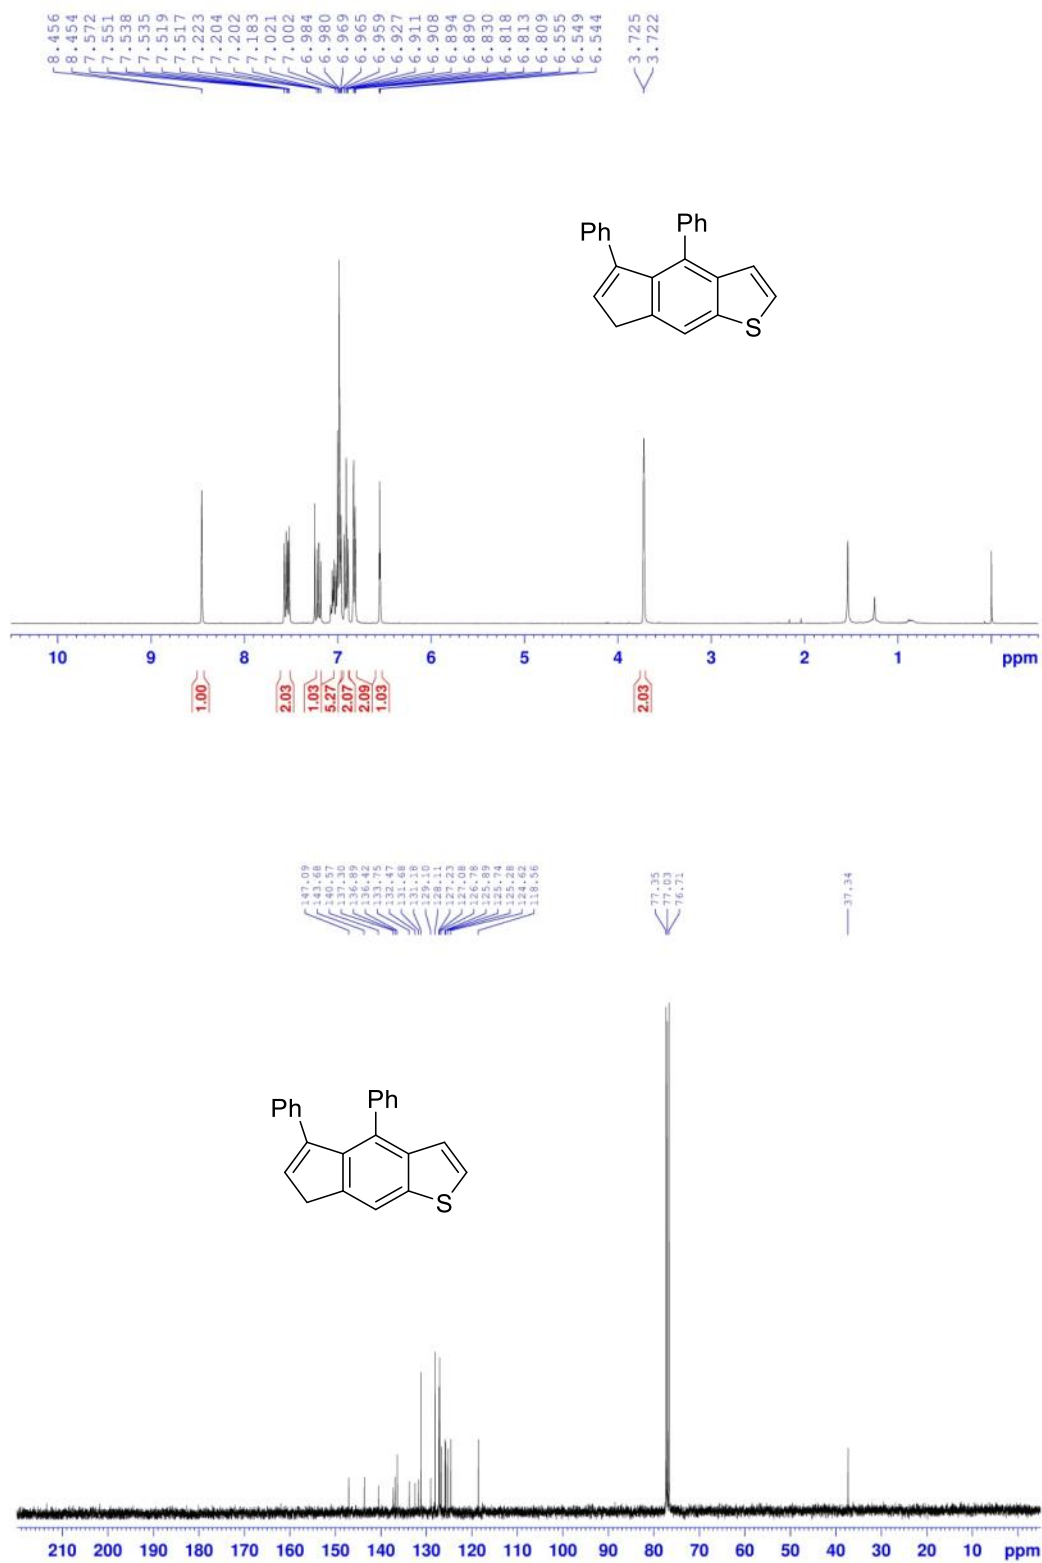

Supplement: Supplementary file 1 [file 3864016]
